# Supplementary material for: Coupling plant litter quantity to a novel metric for litter quality explains C storage changes in a thawing permafrost peatland
Source: PubMed Central journal article supplement — Glob Chang Biol. 2021 Nov 17;28(3):950–68. doi: 10.1111/gcb.15970 (PMC9298822; doi:10.1111/gcb.15970), 2021-11-17

# Supplemental Figures

# Figure S1: leaf nutrients across habitats

a)

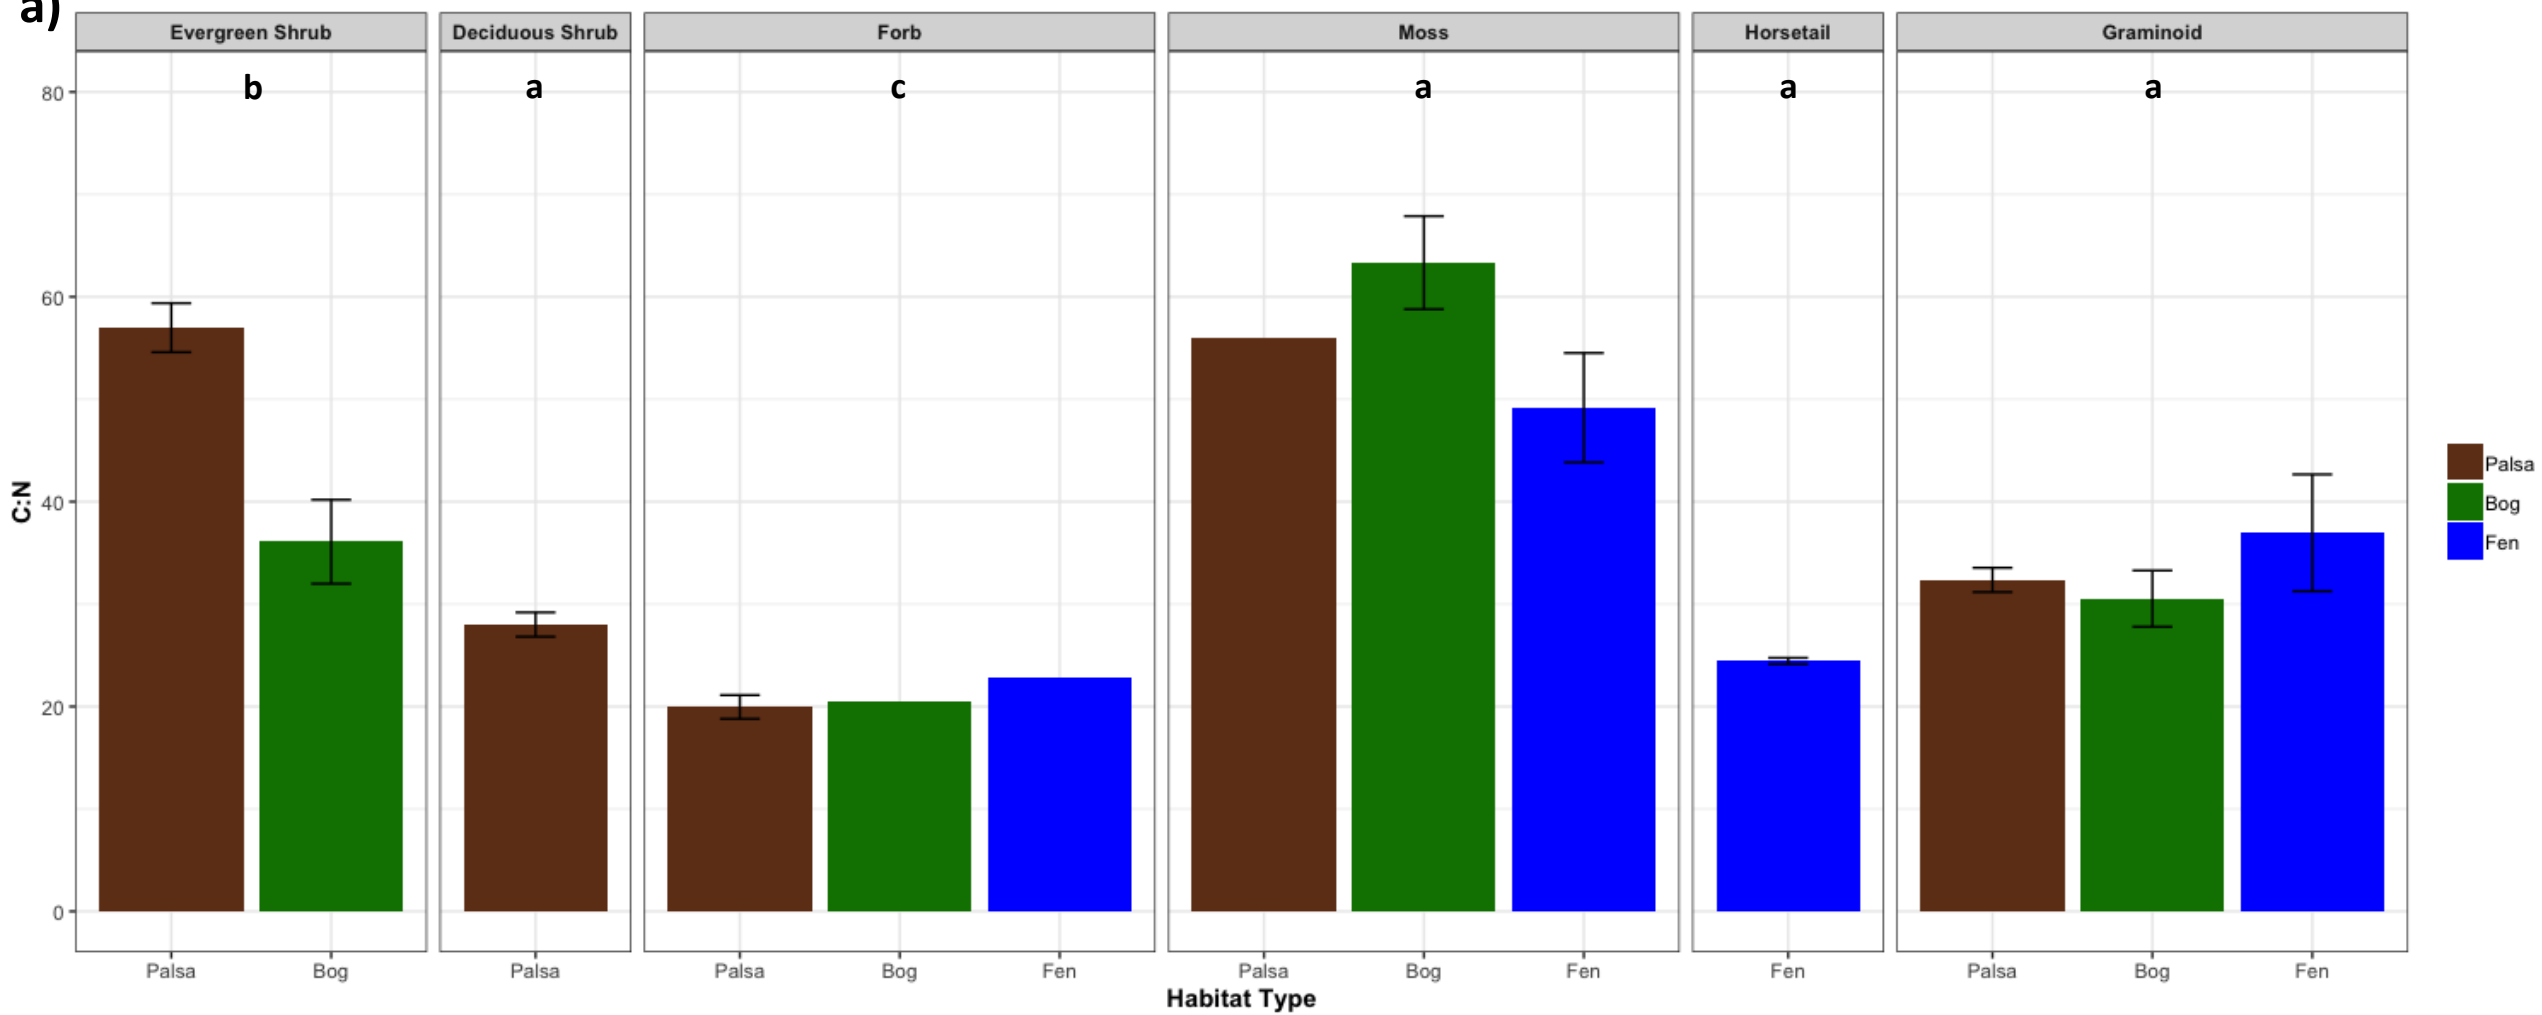

b)

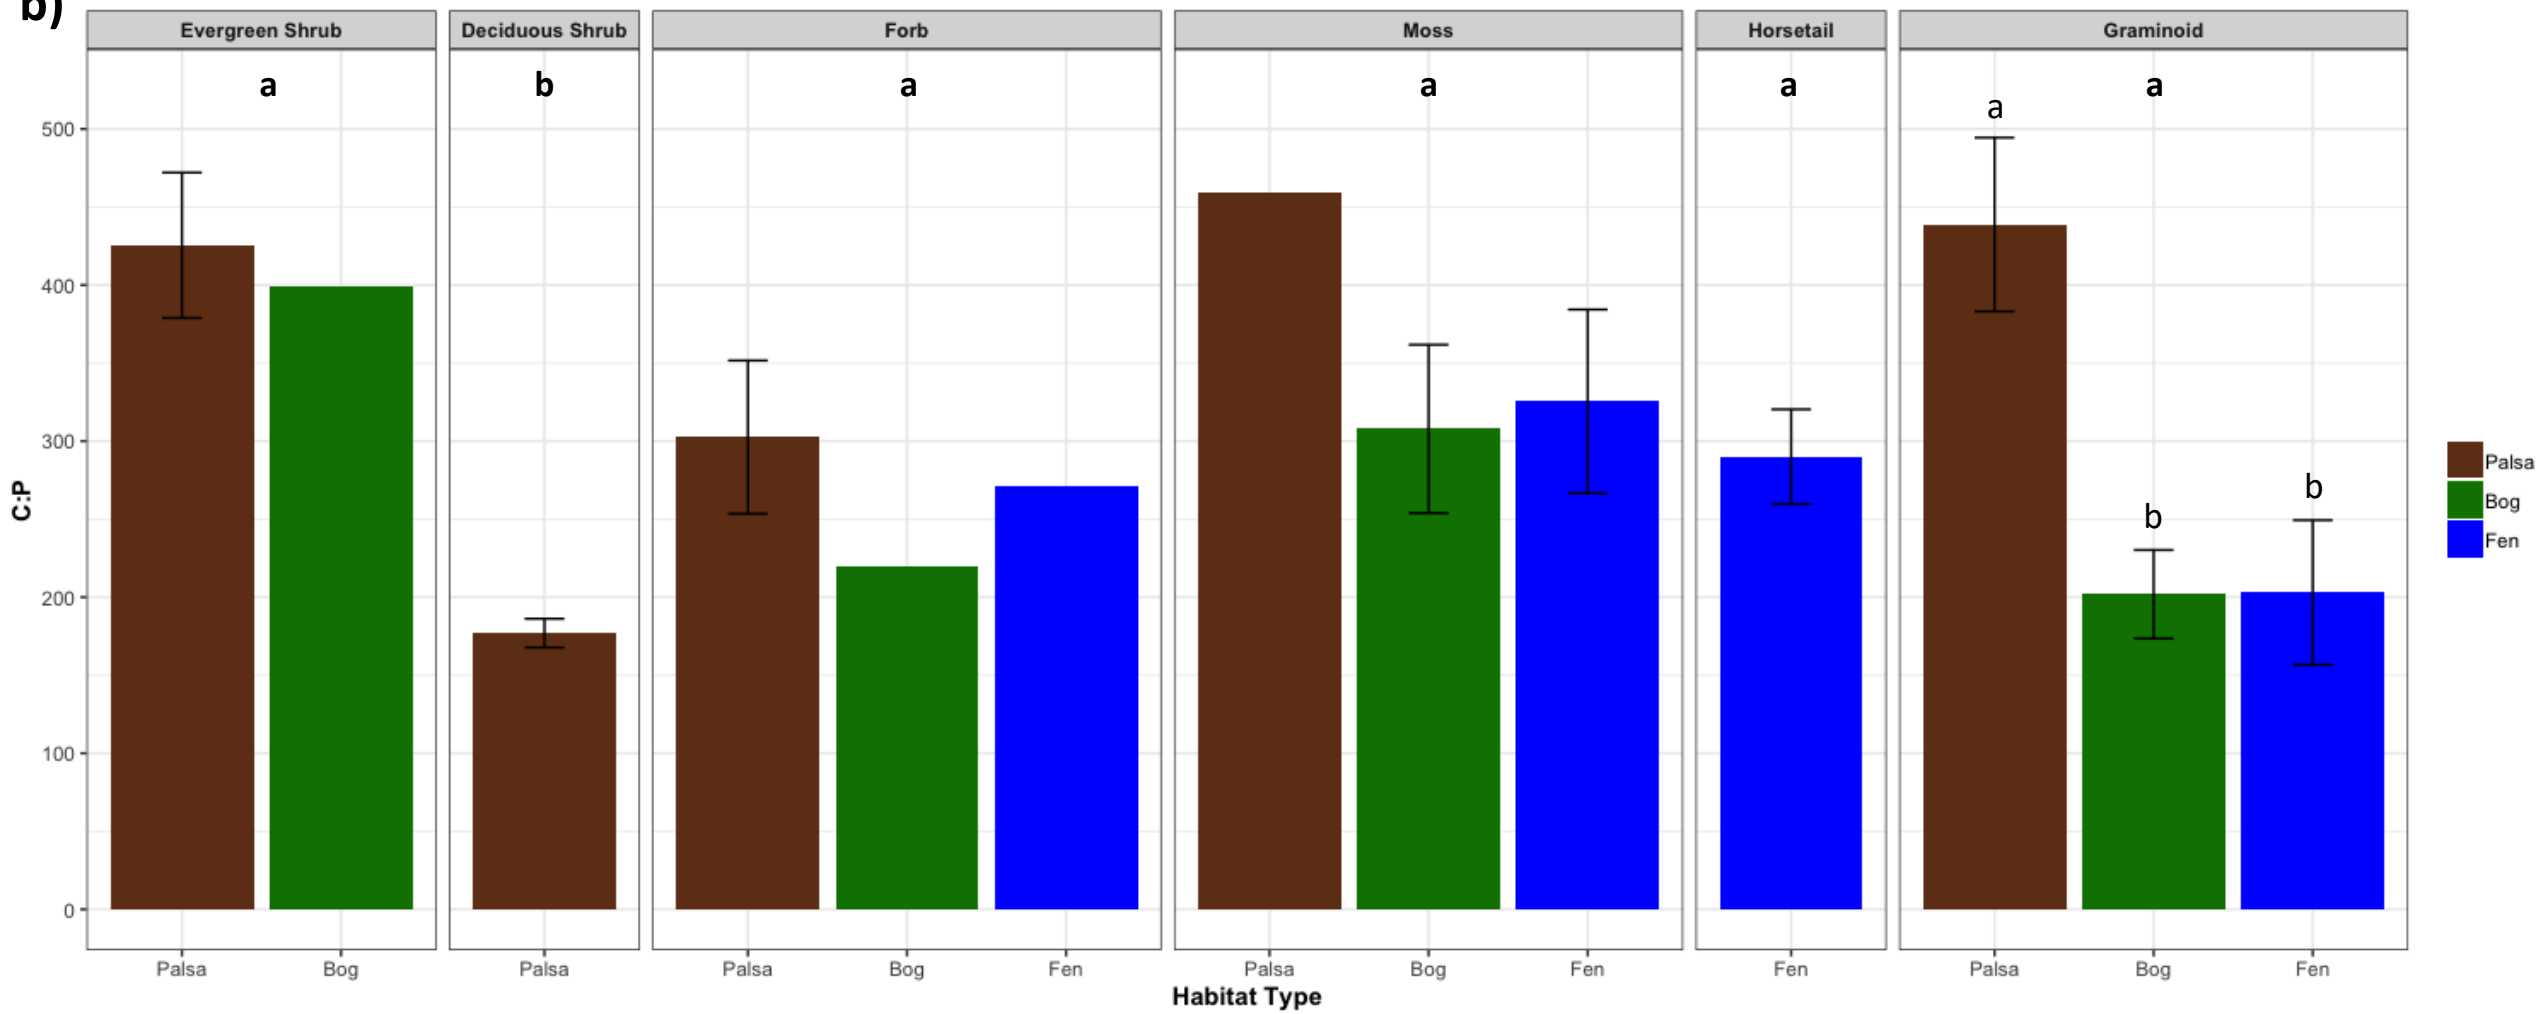

c)

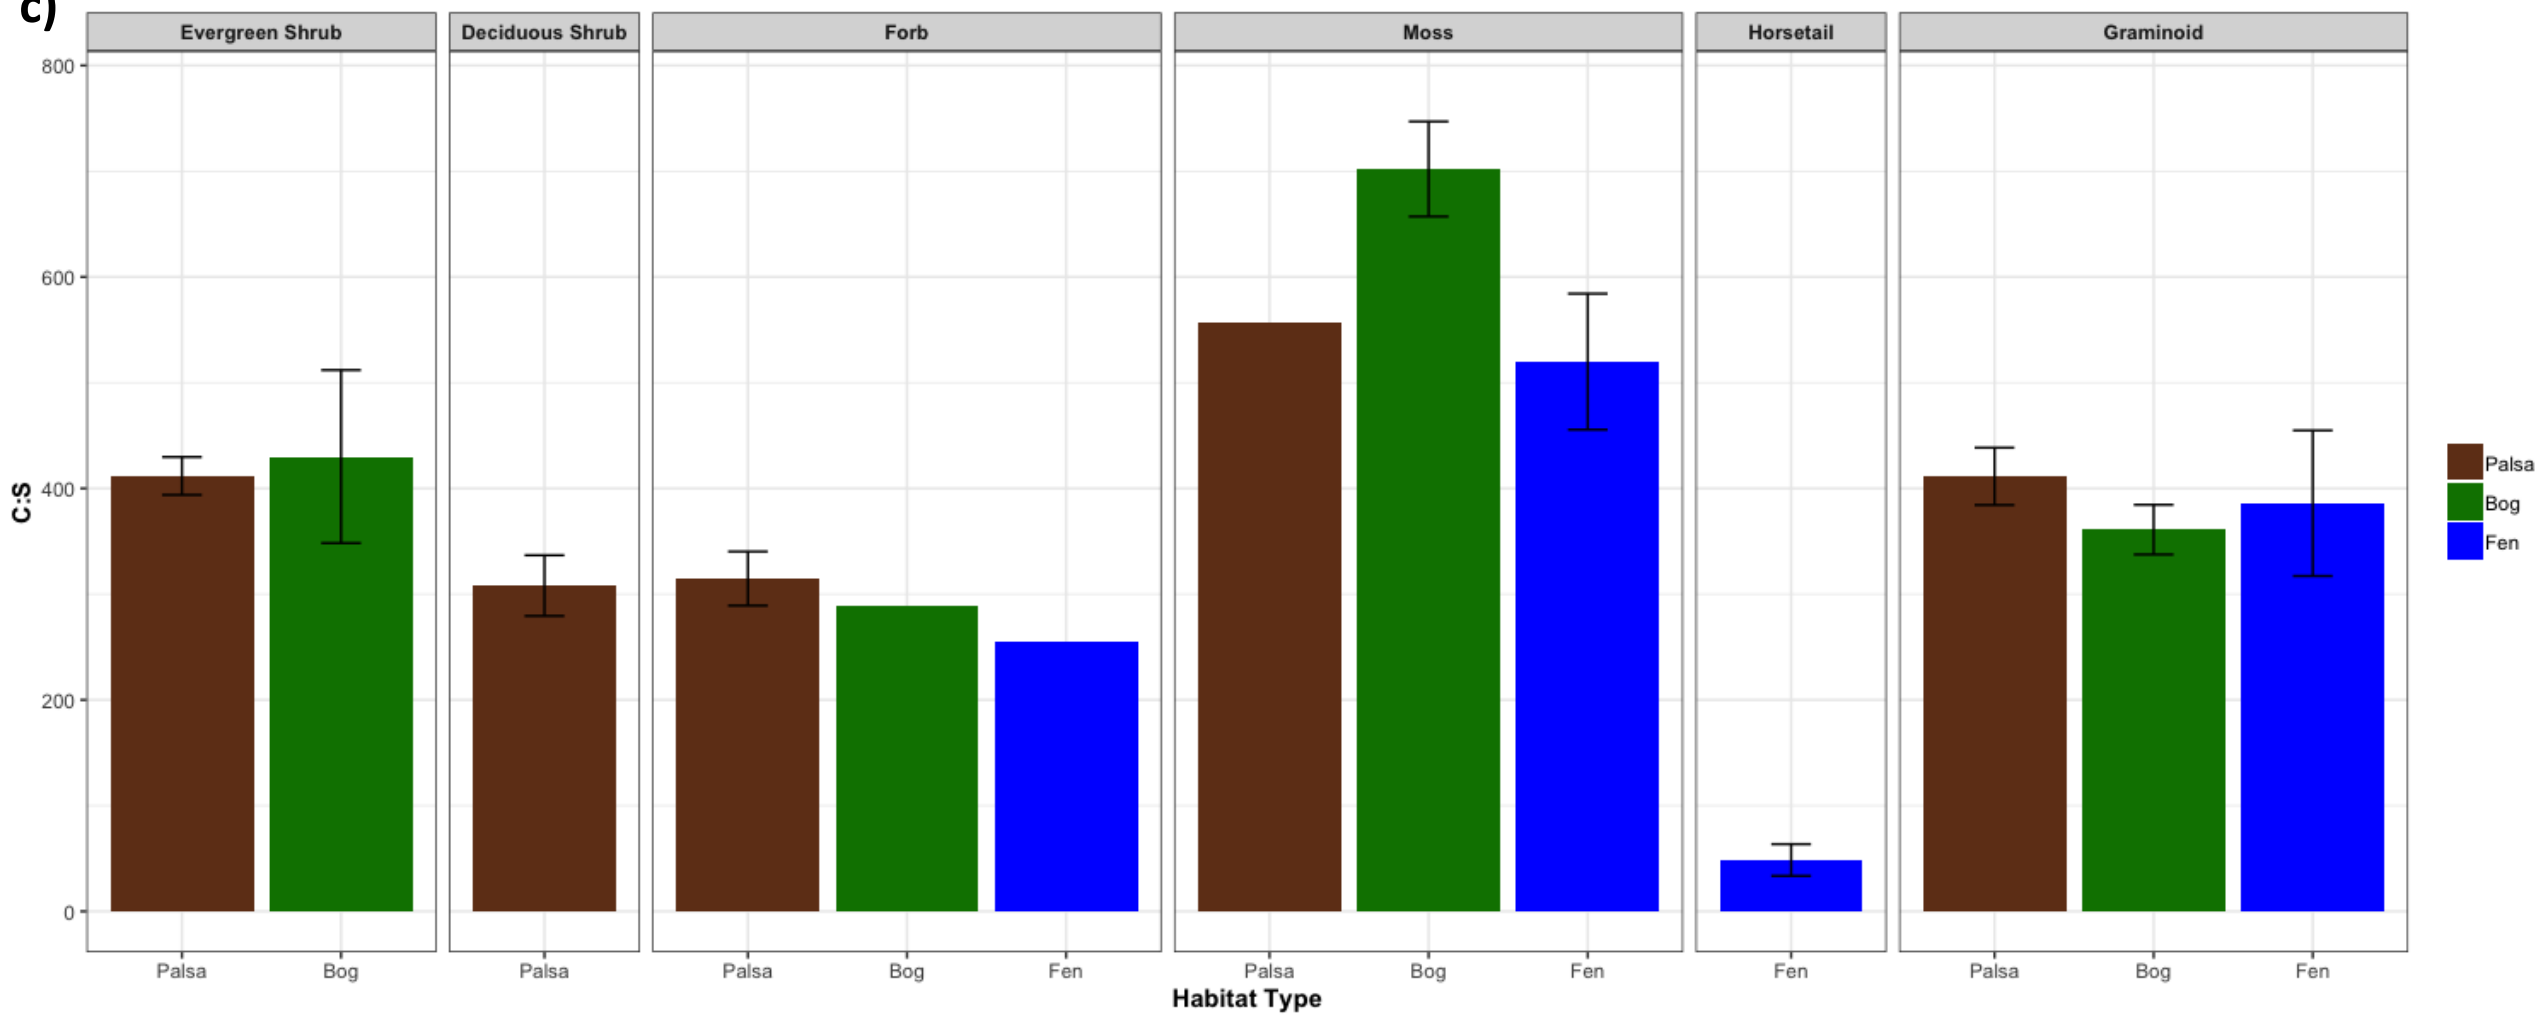

d)

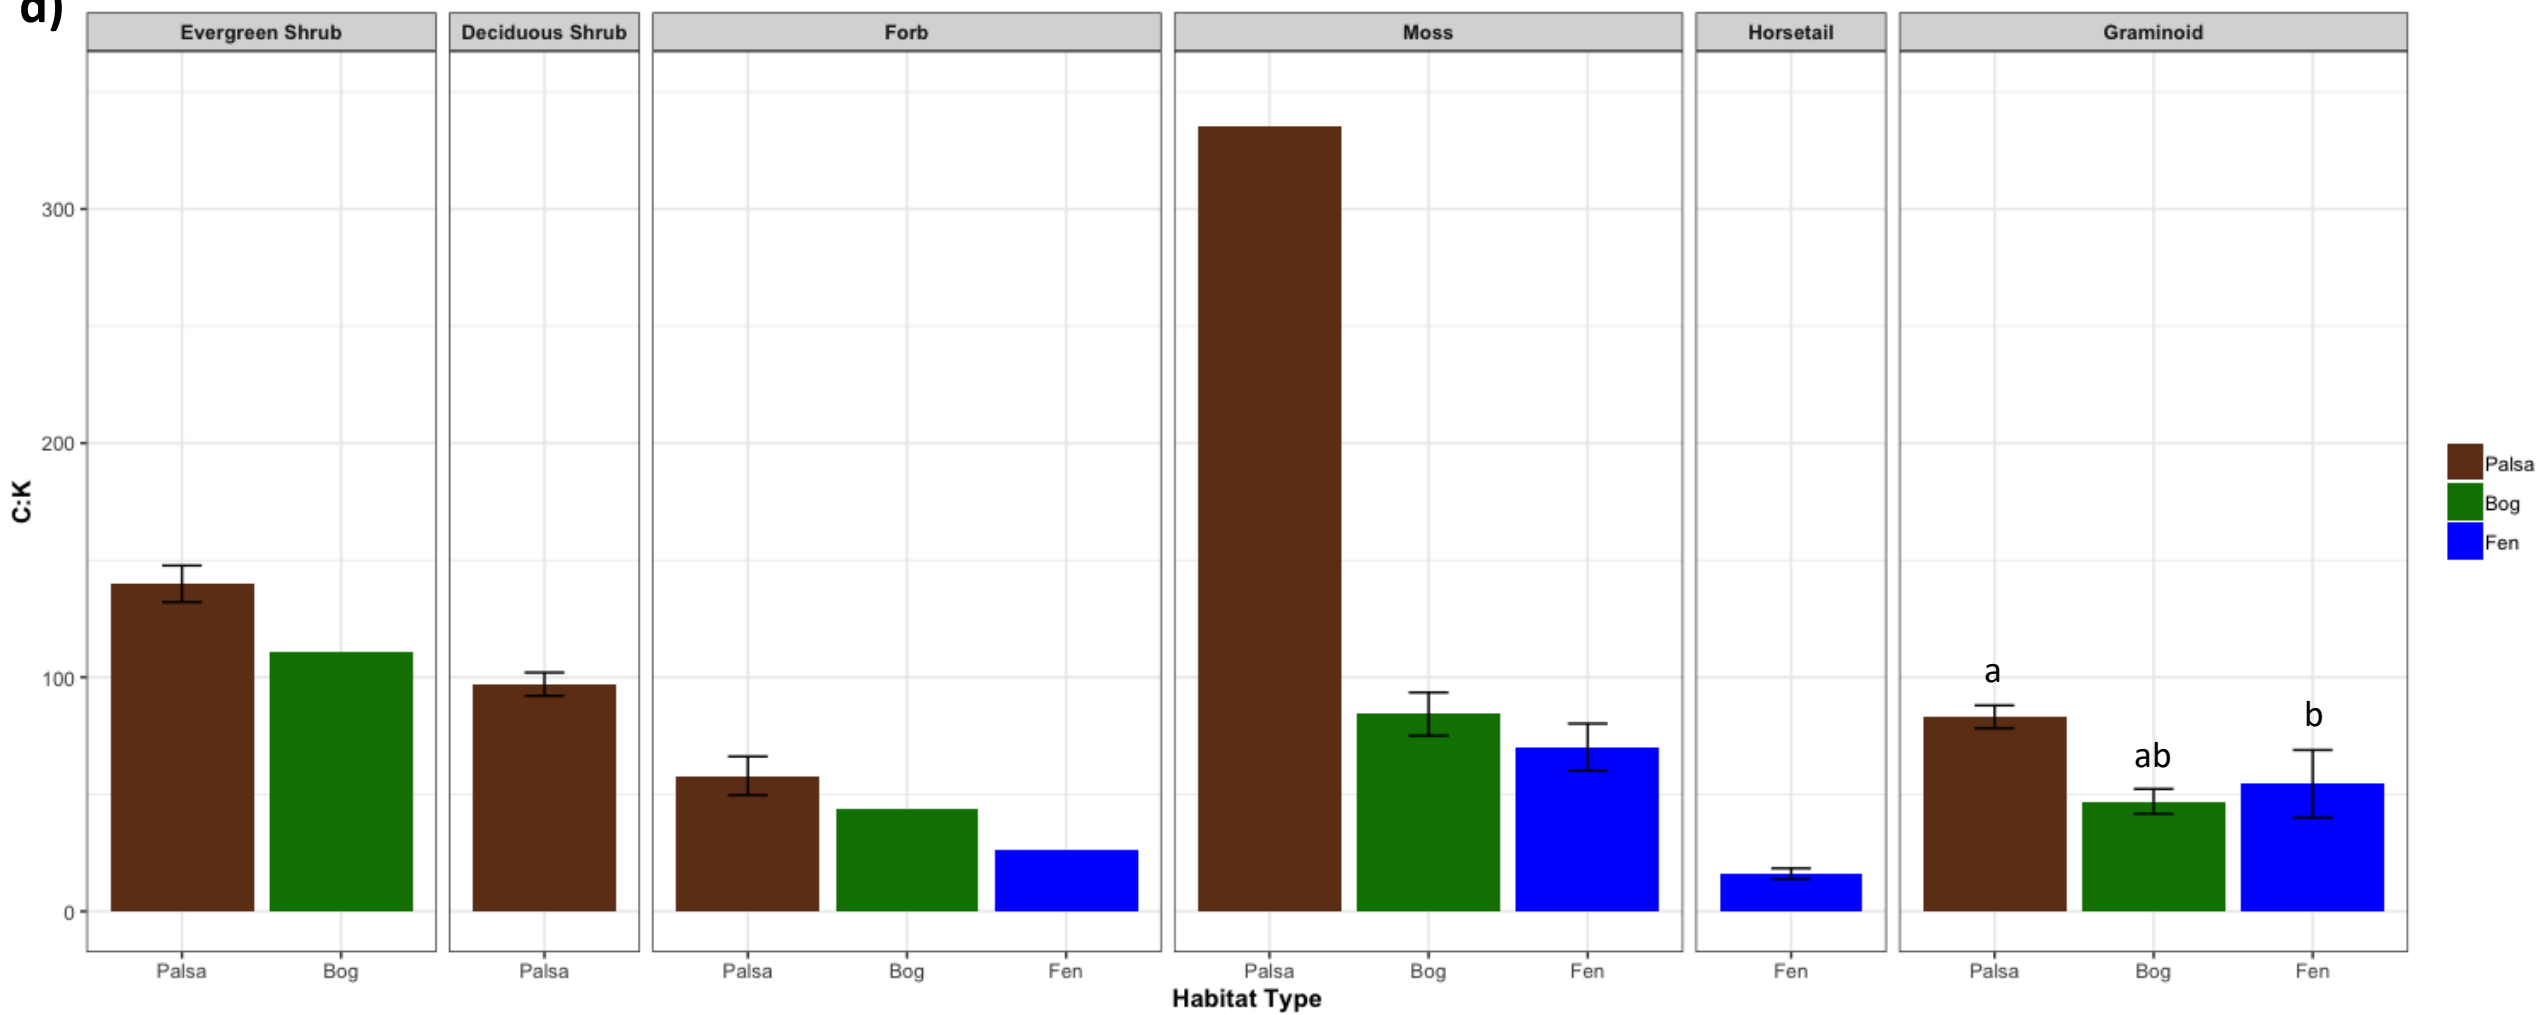

# Figure S2: Litter pfts and nutrients

a)

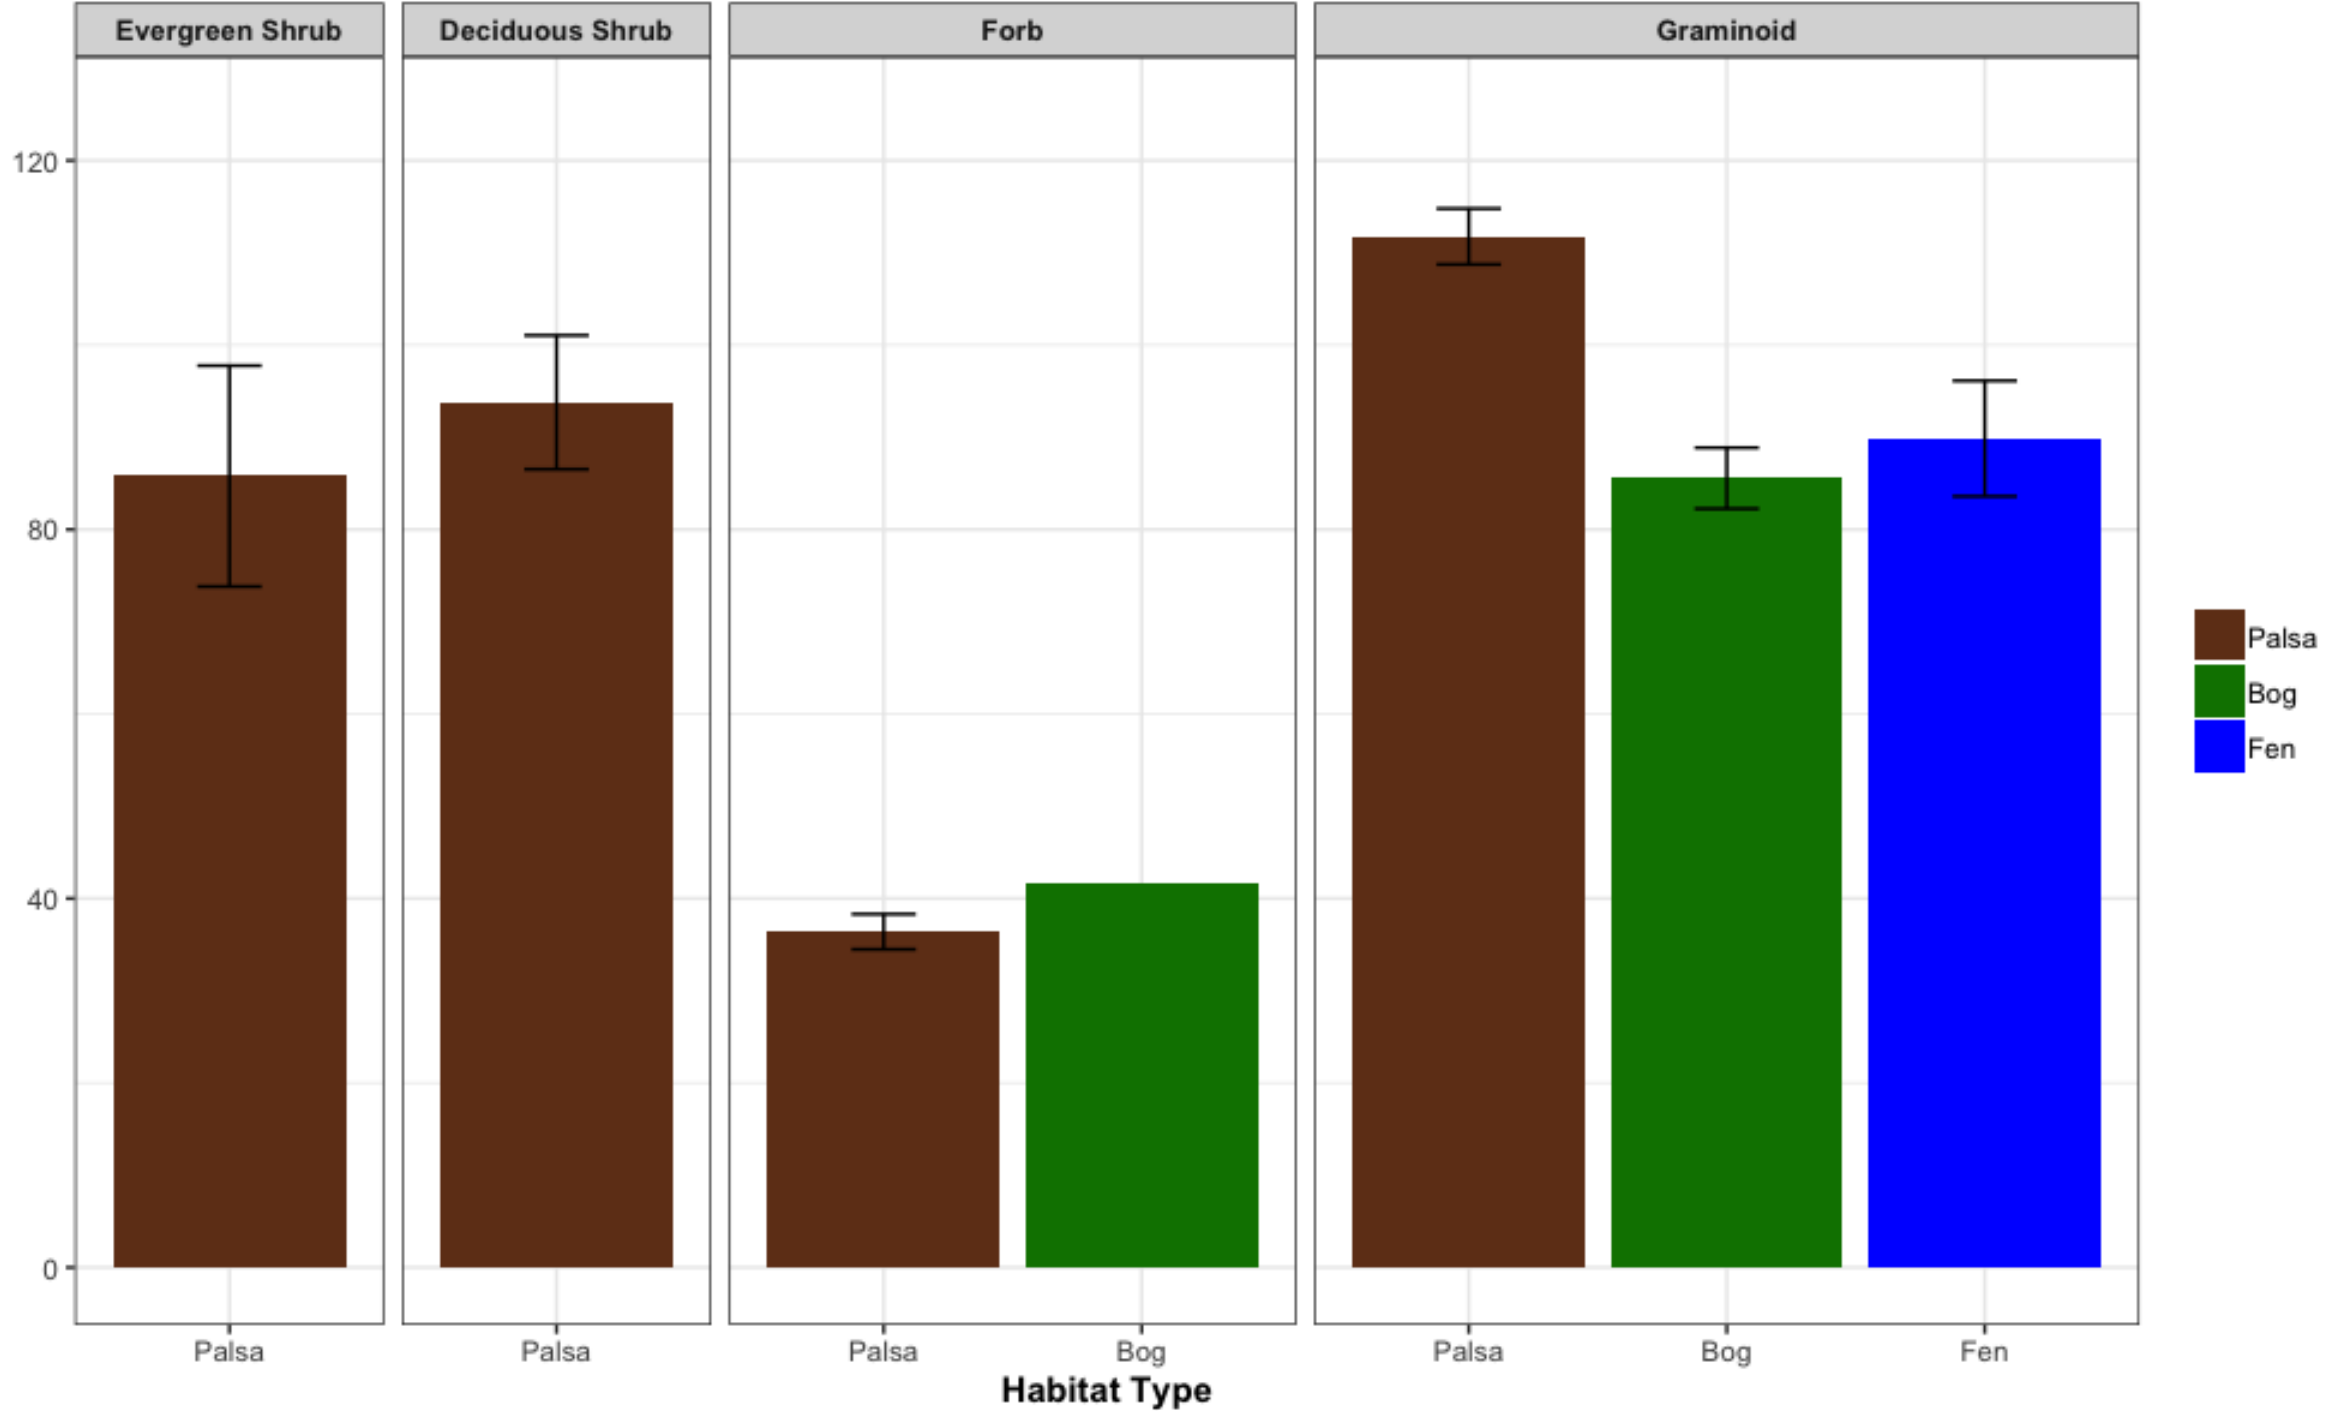



b)

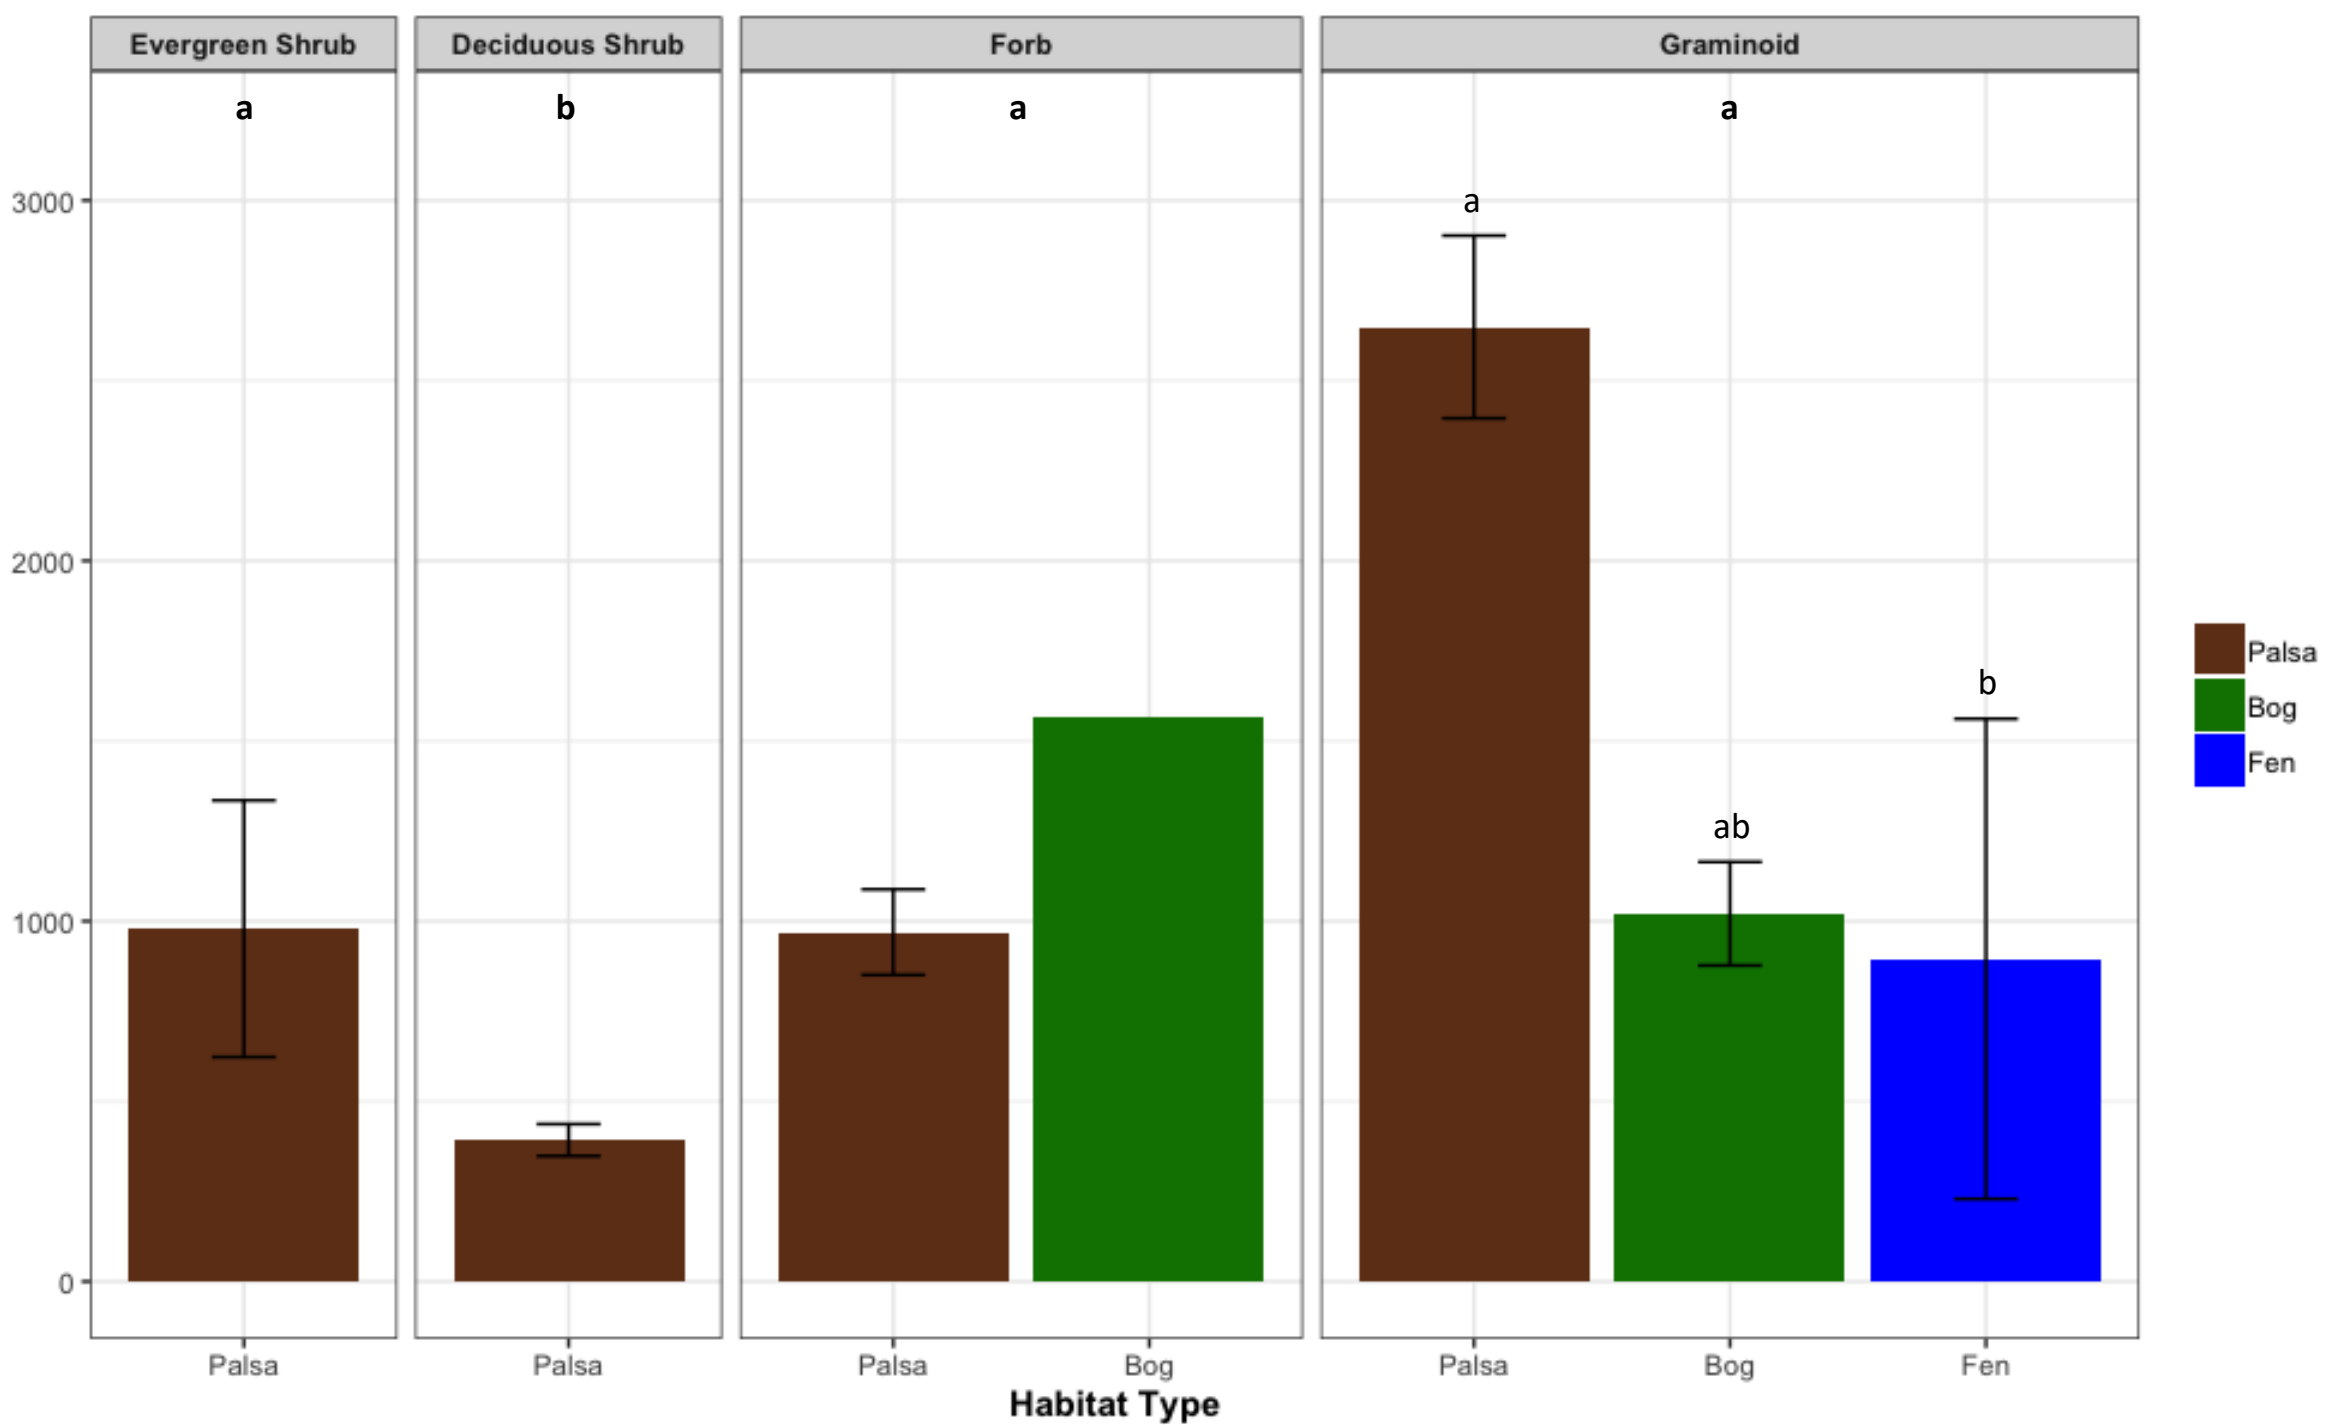

c)

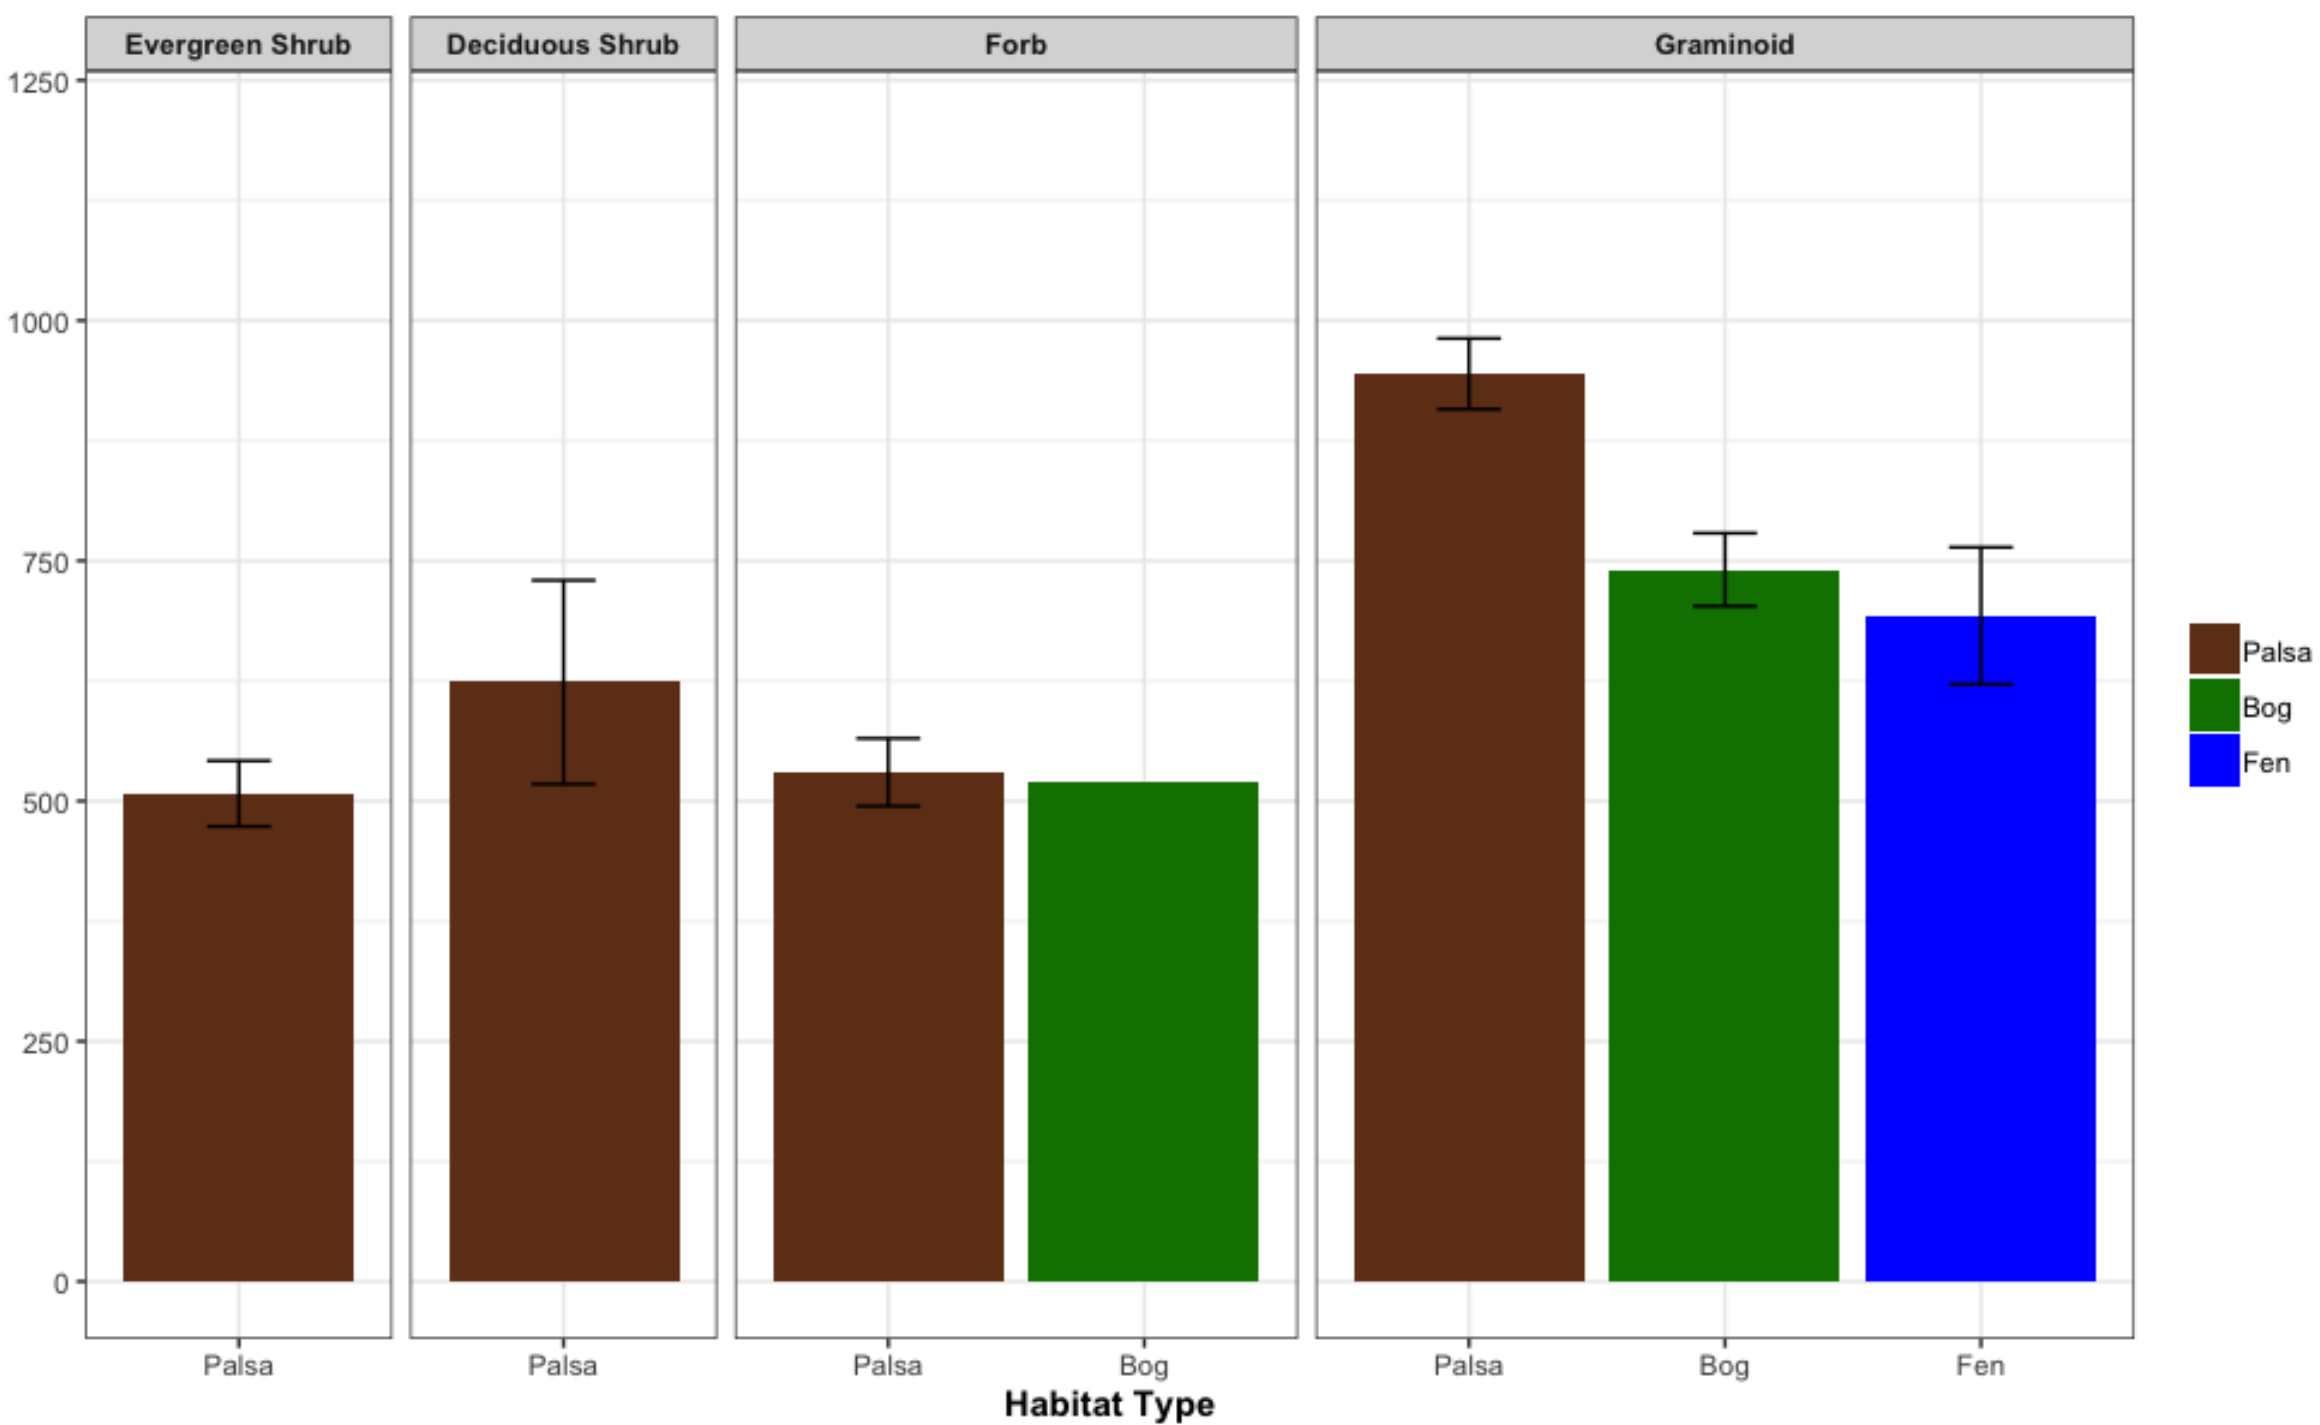

d)

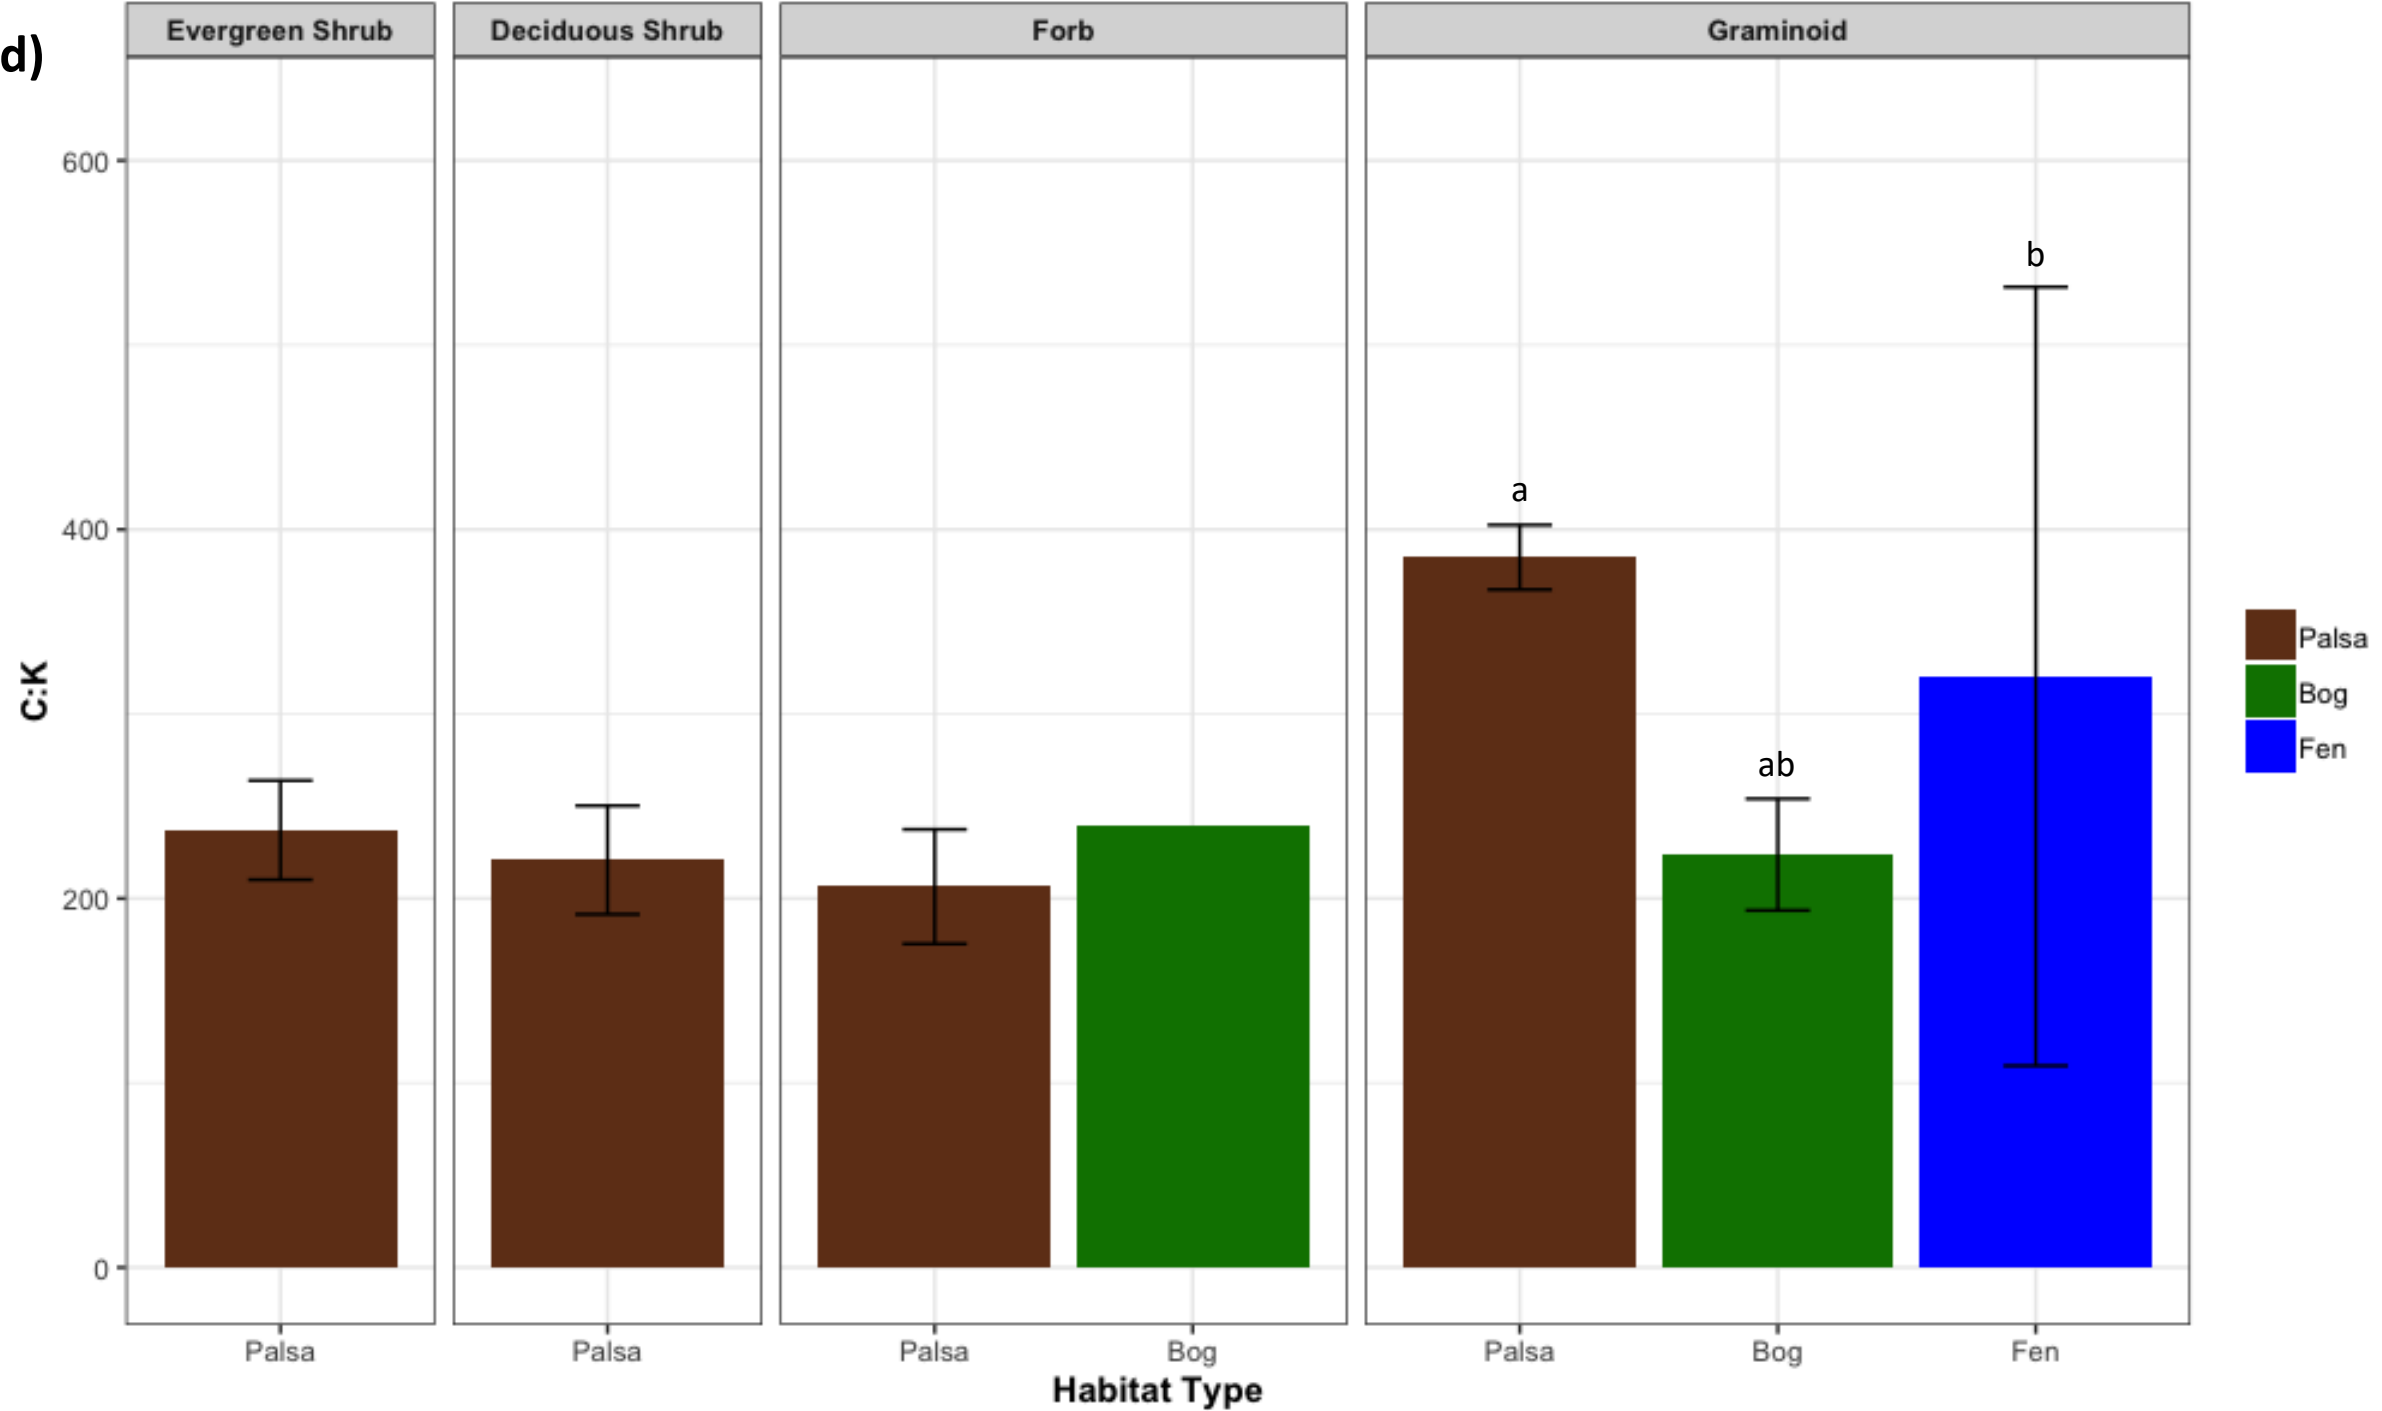

# Figure S3: Root PFTs and nutrients

a)

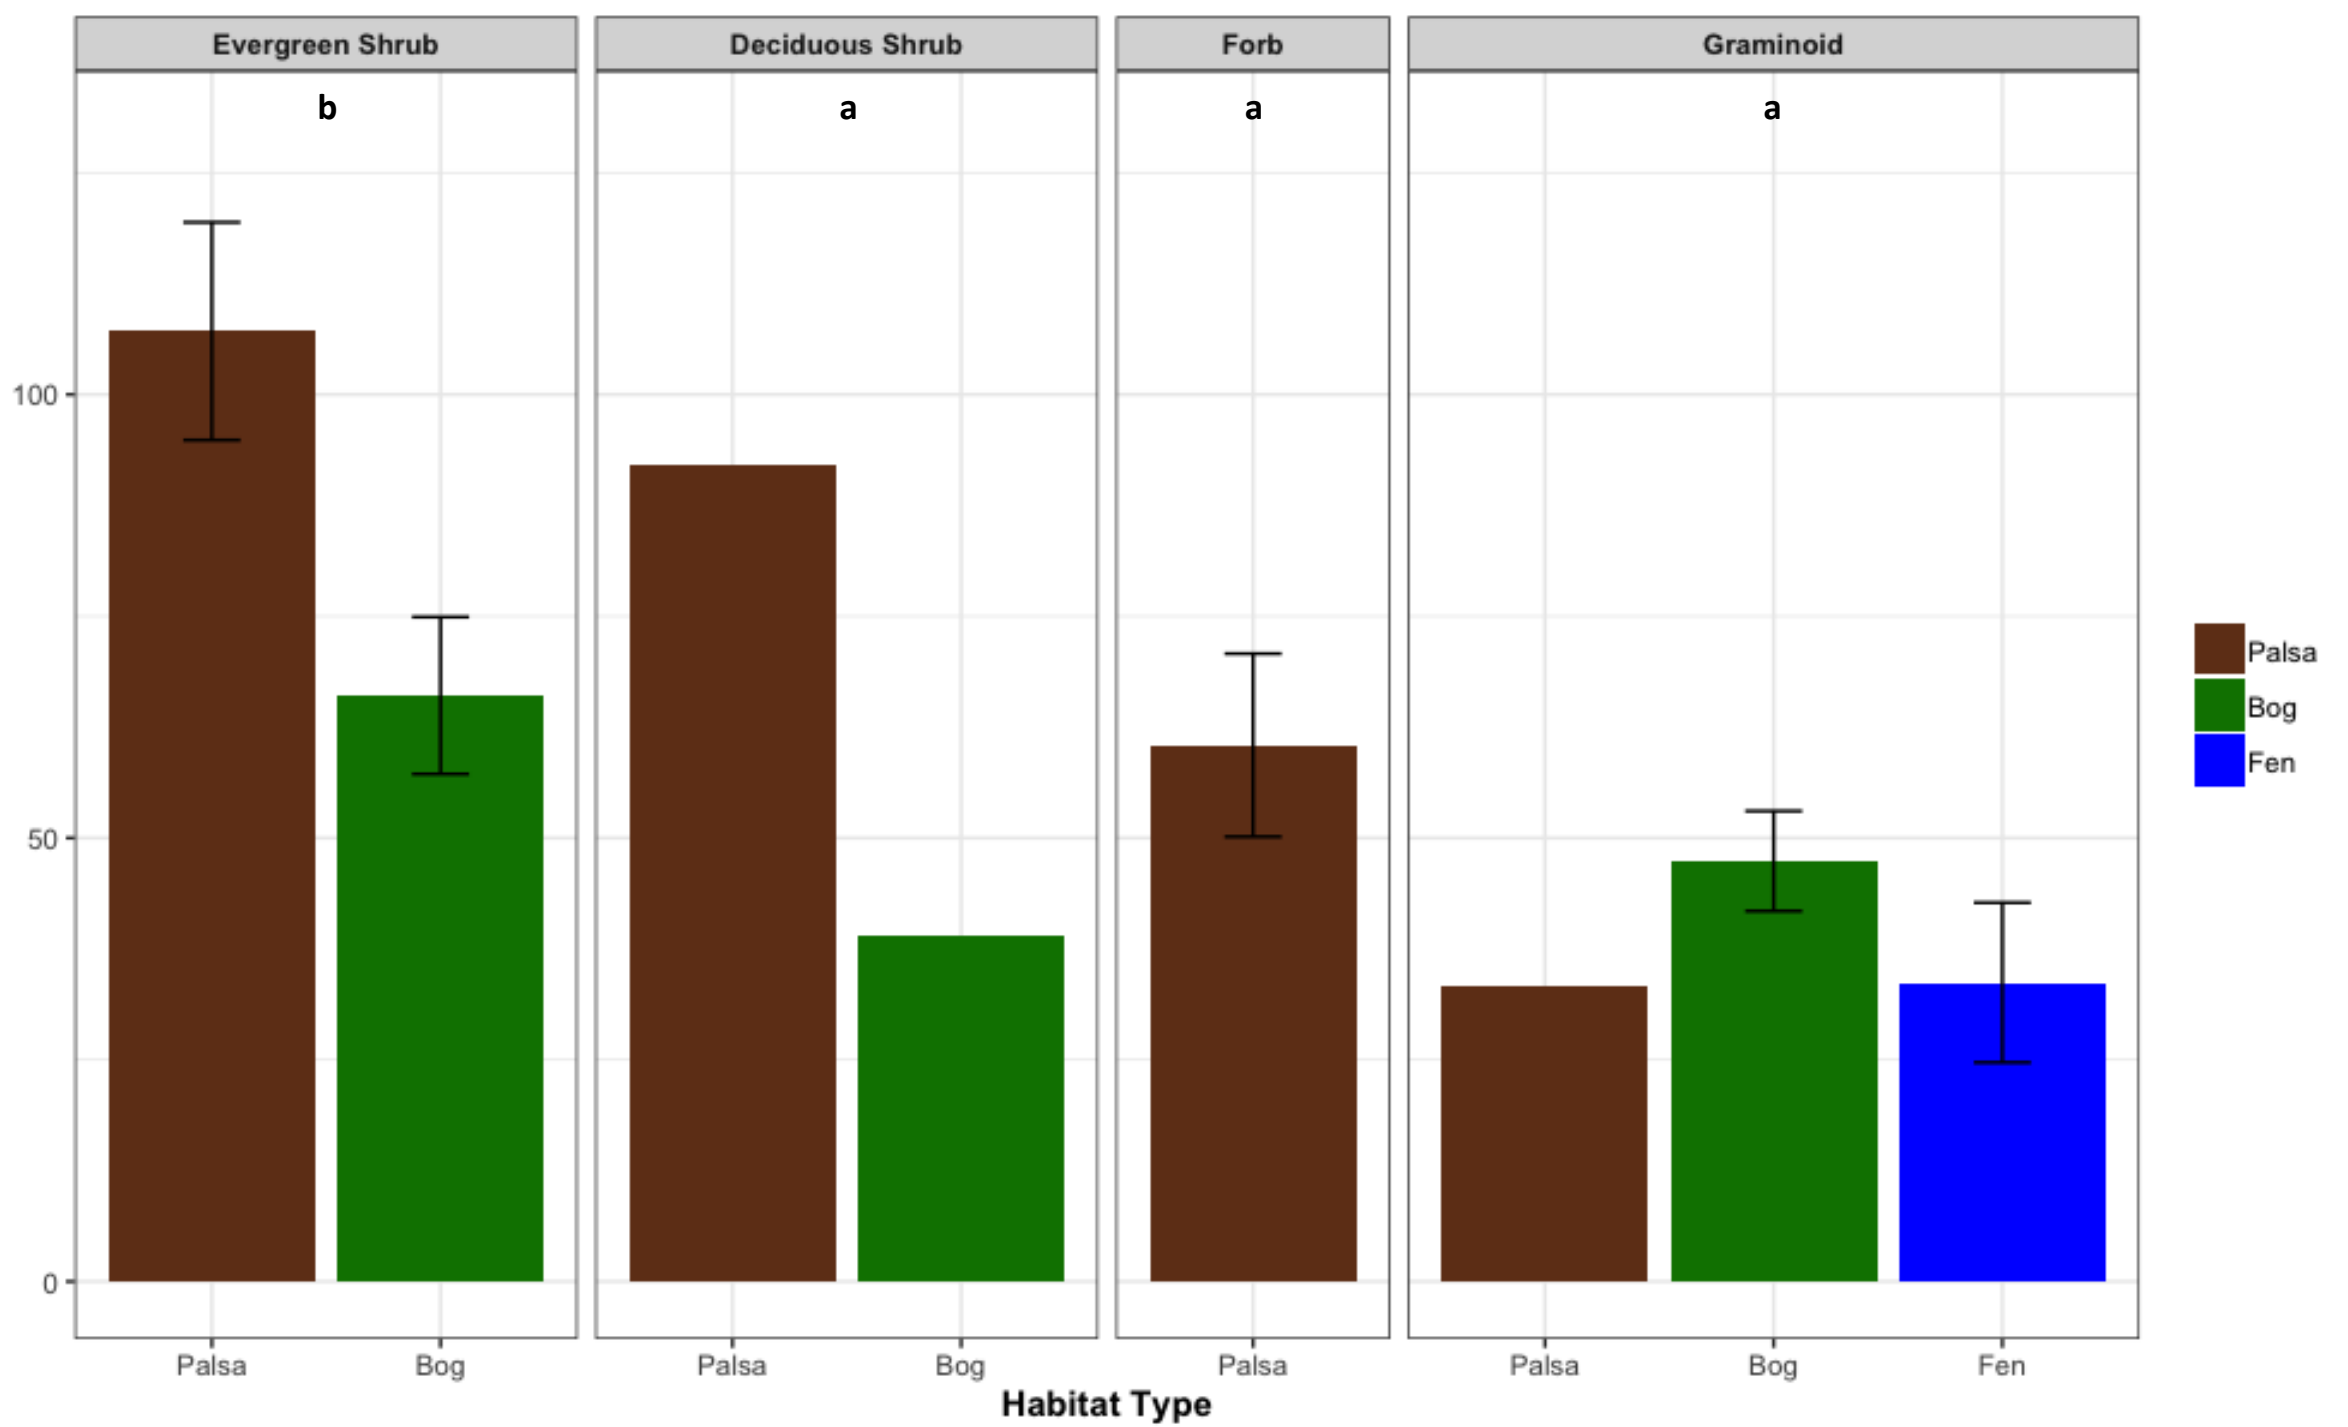

**b)**

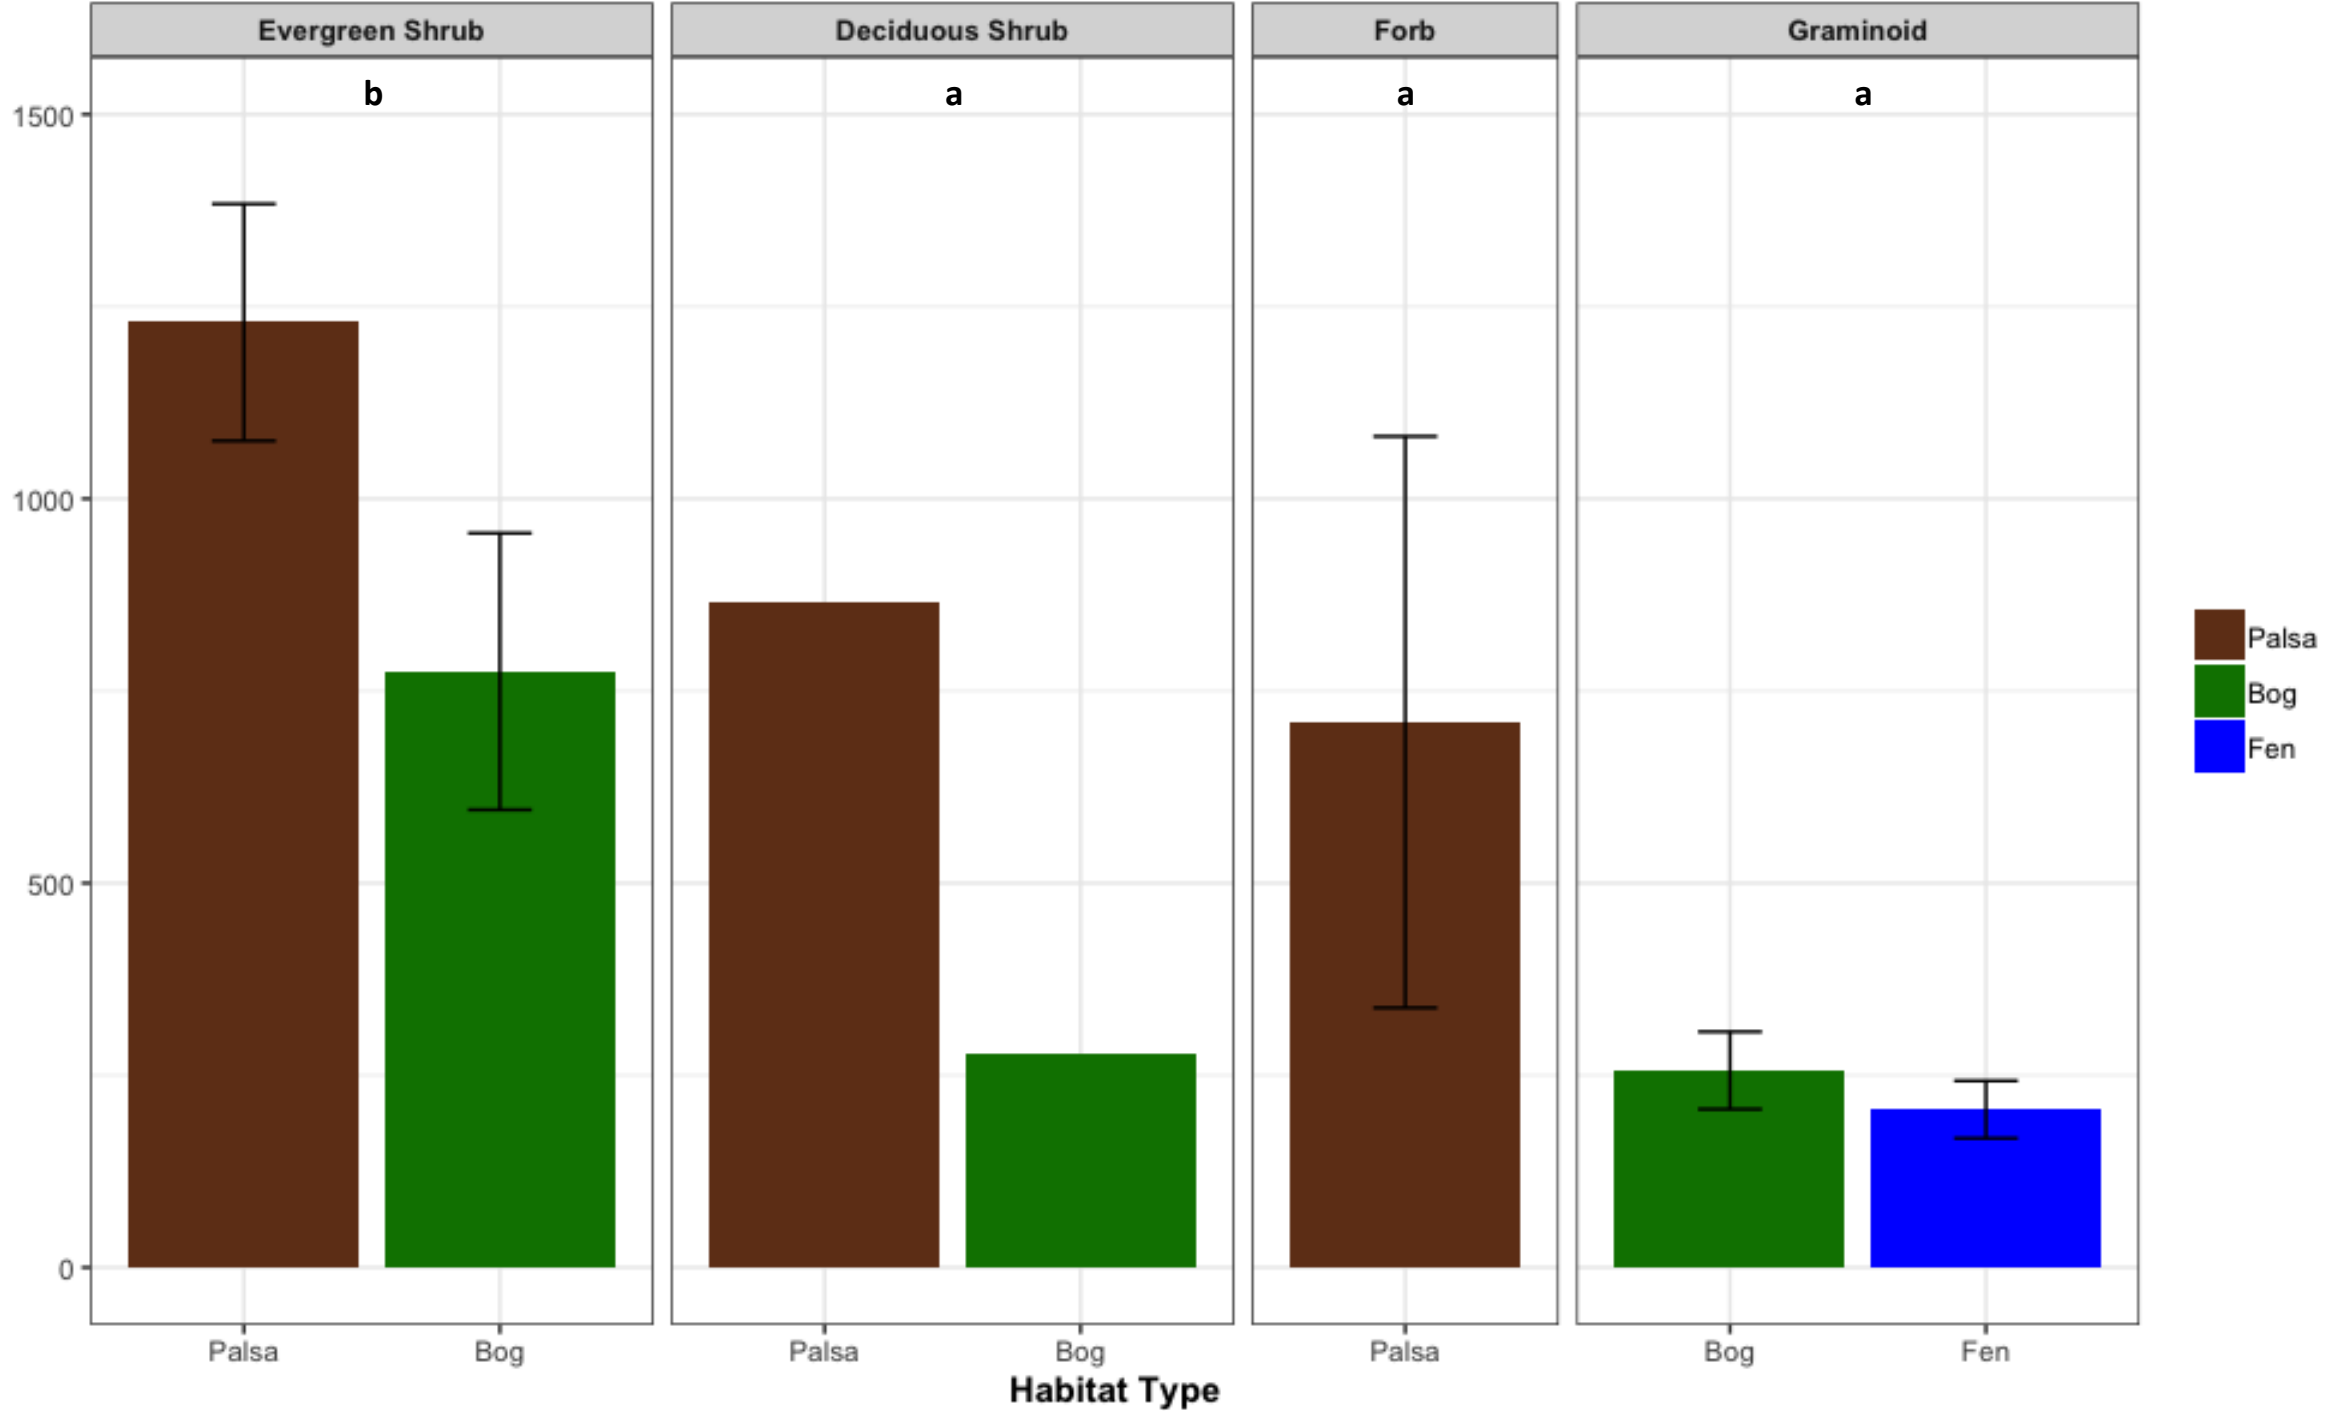

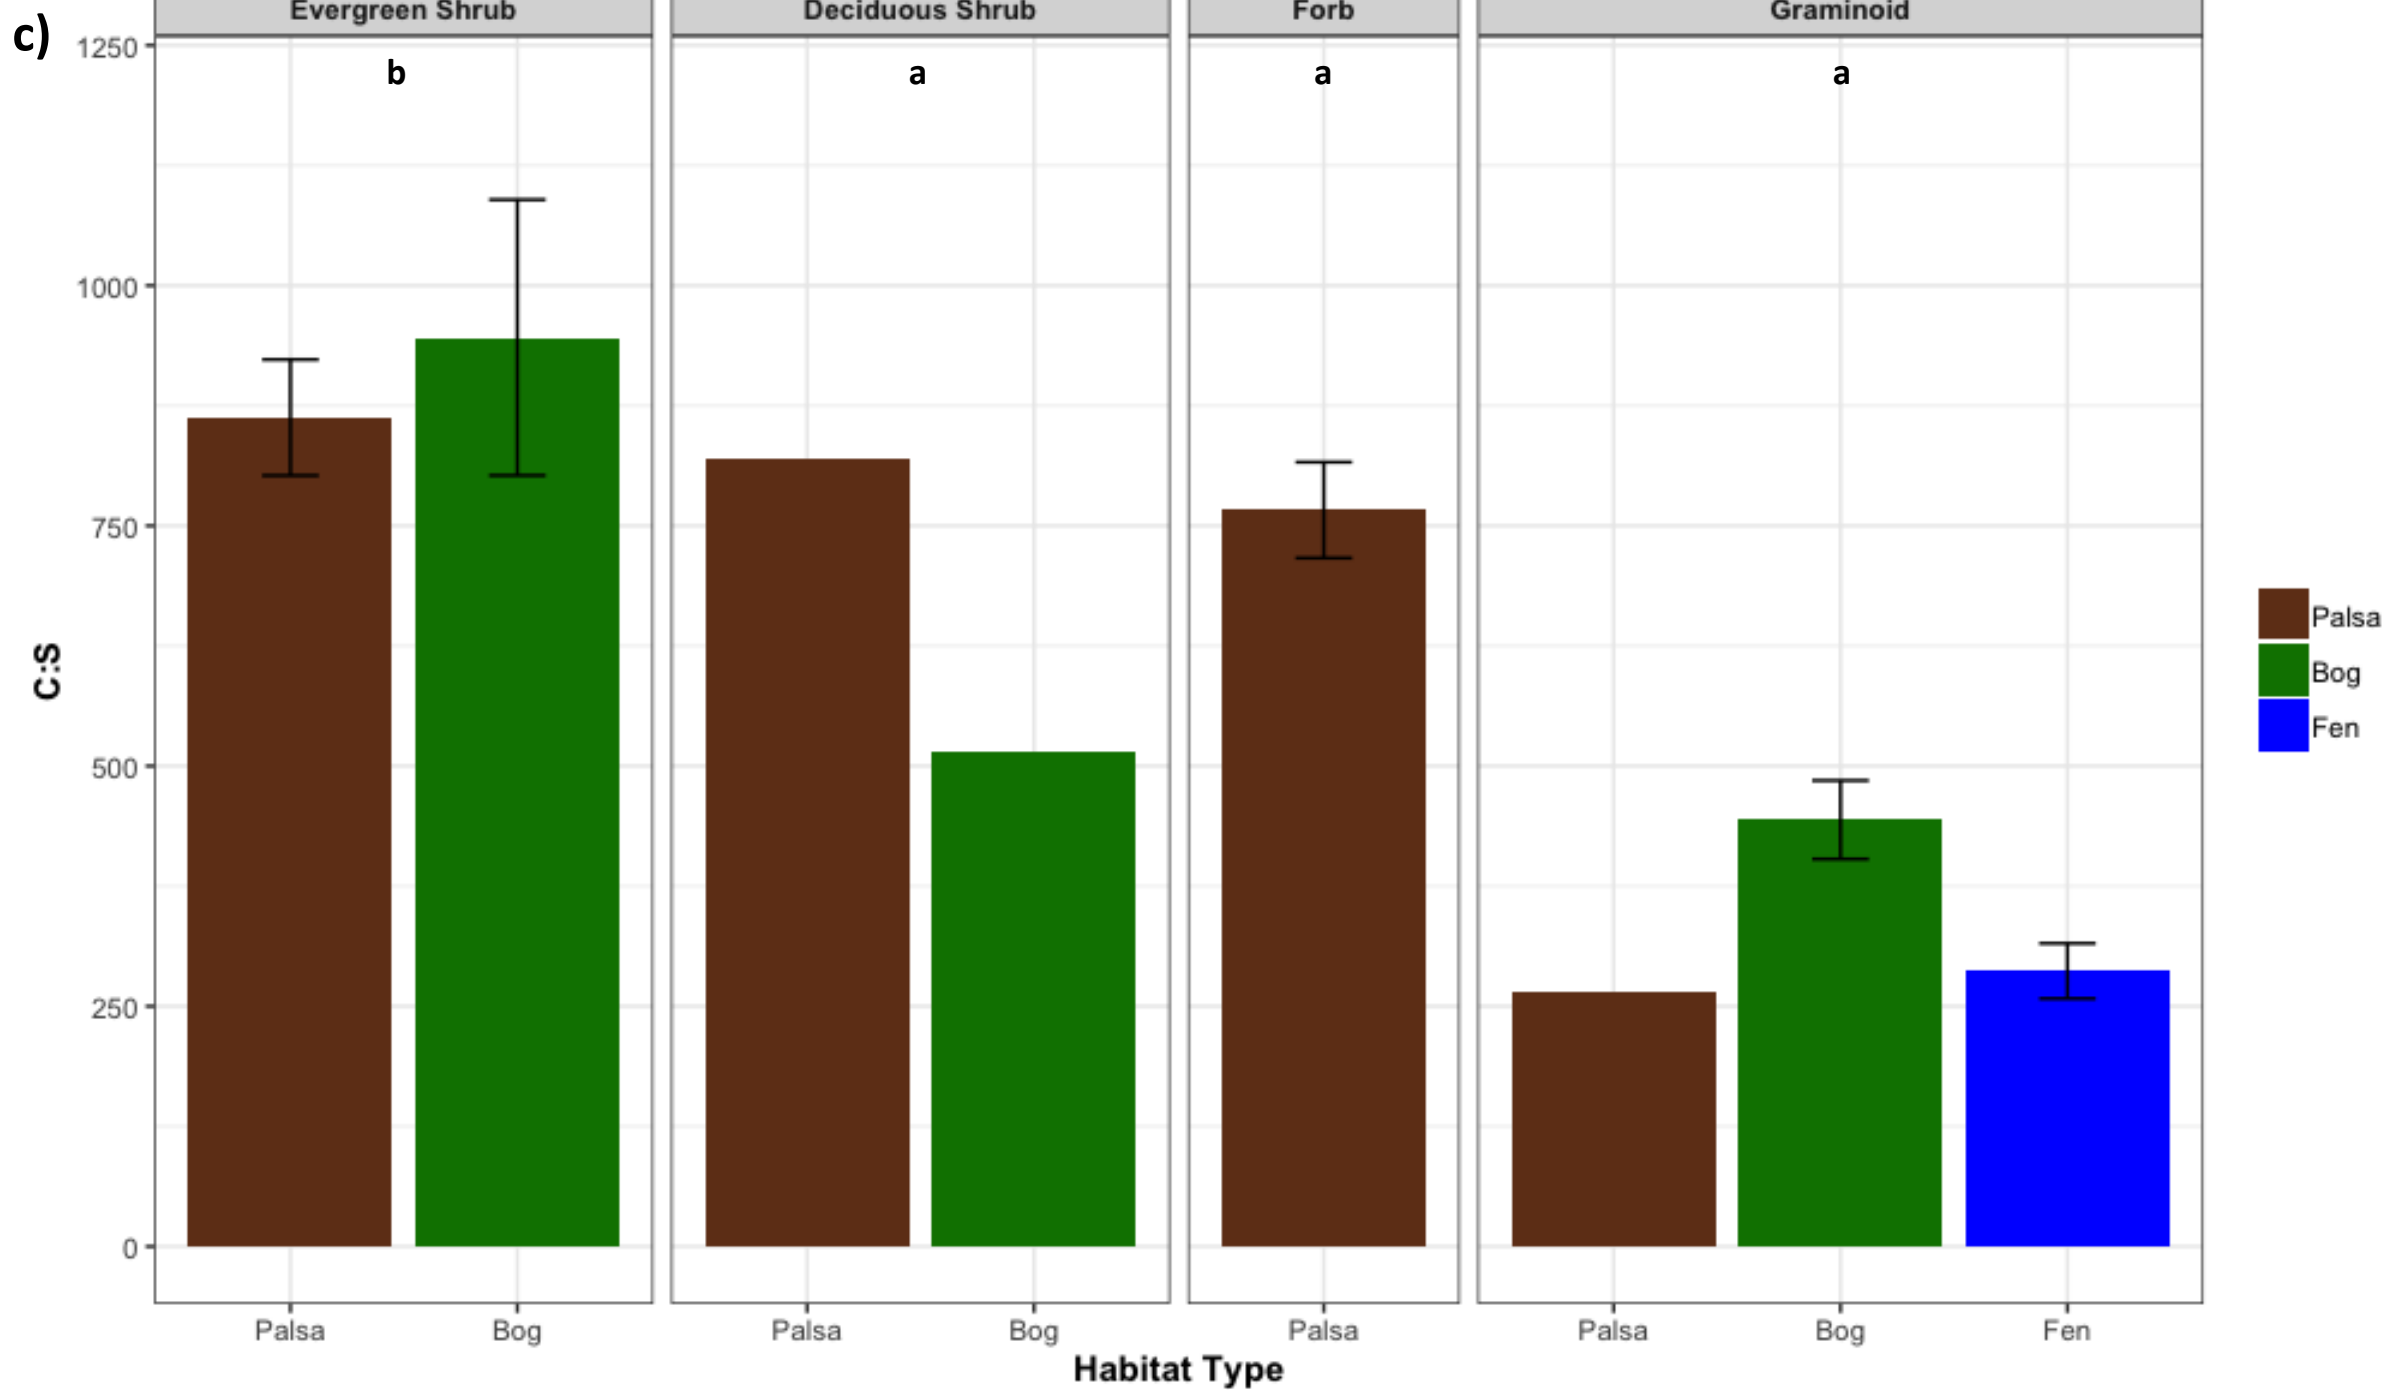

d)

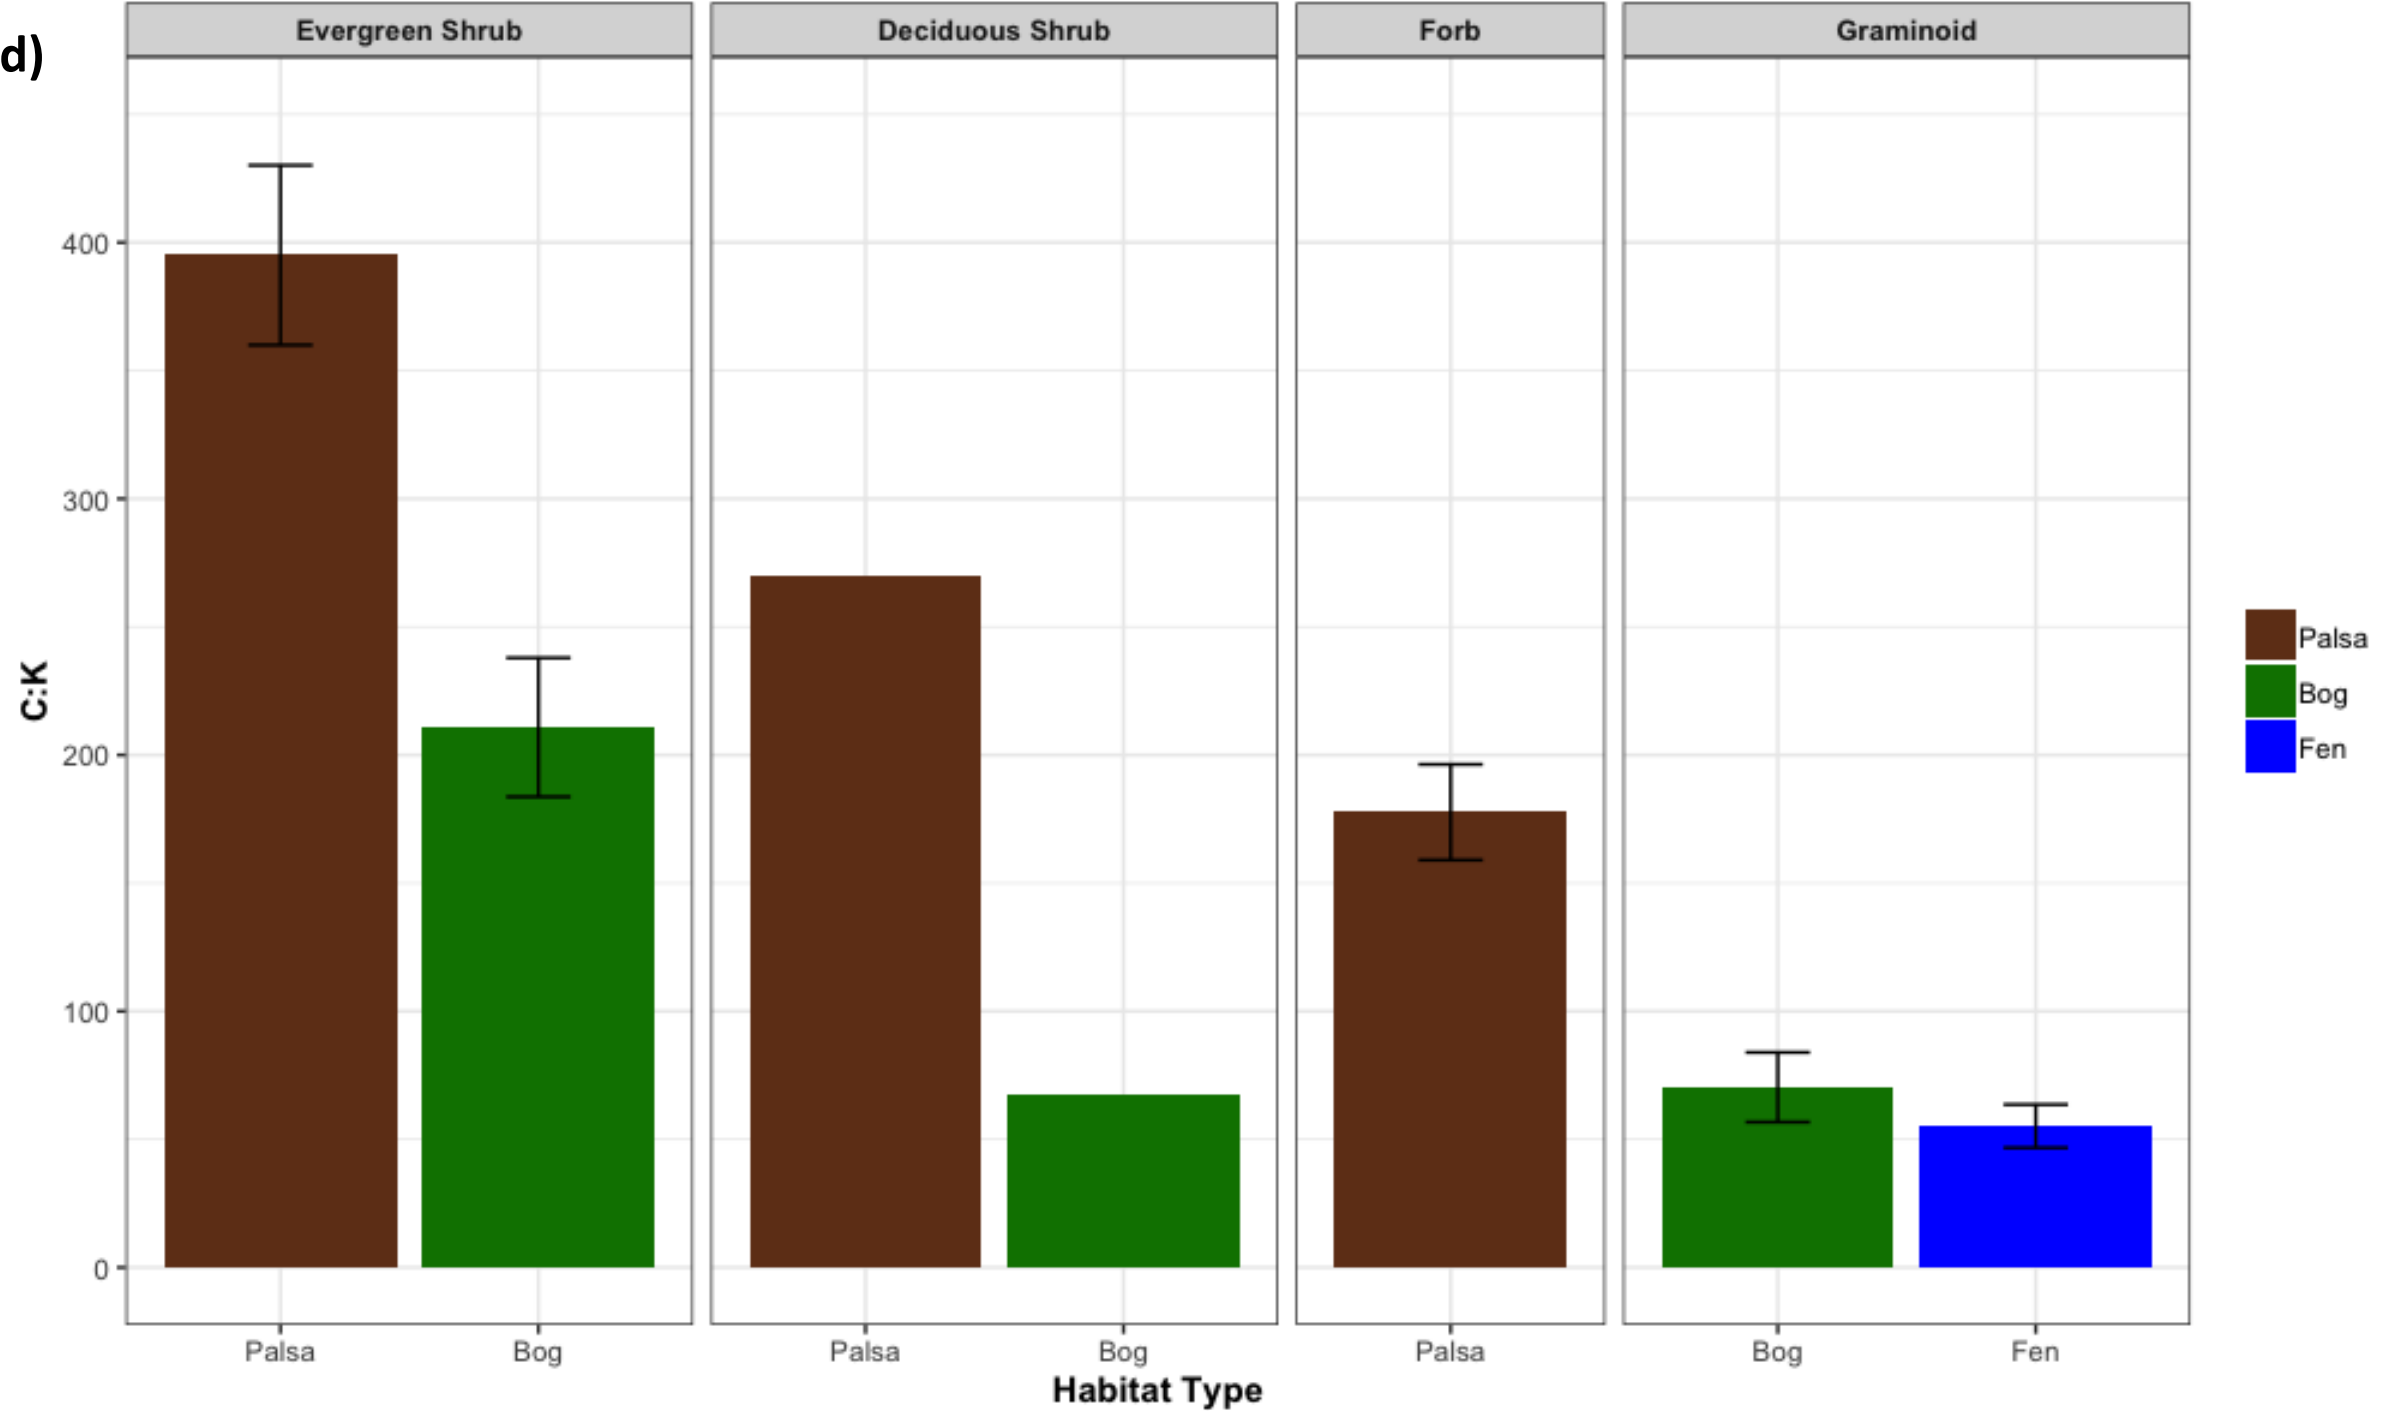



# Figure S4: Leaf nutrient stoichiometry of PFTs

**a)**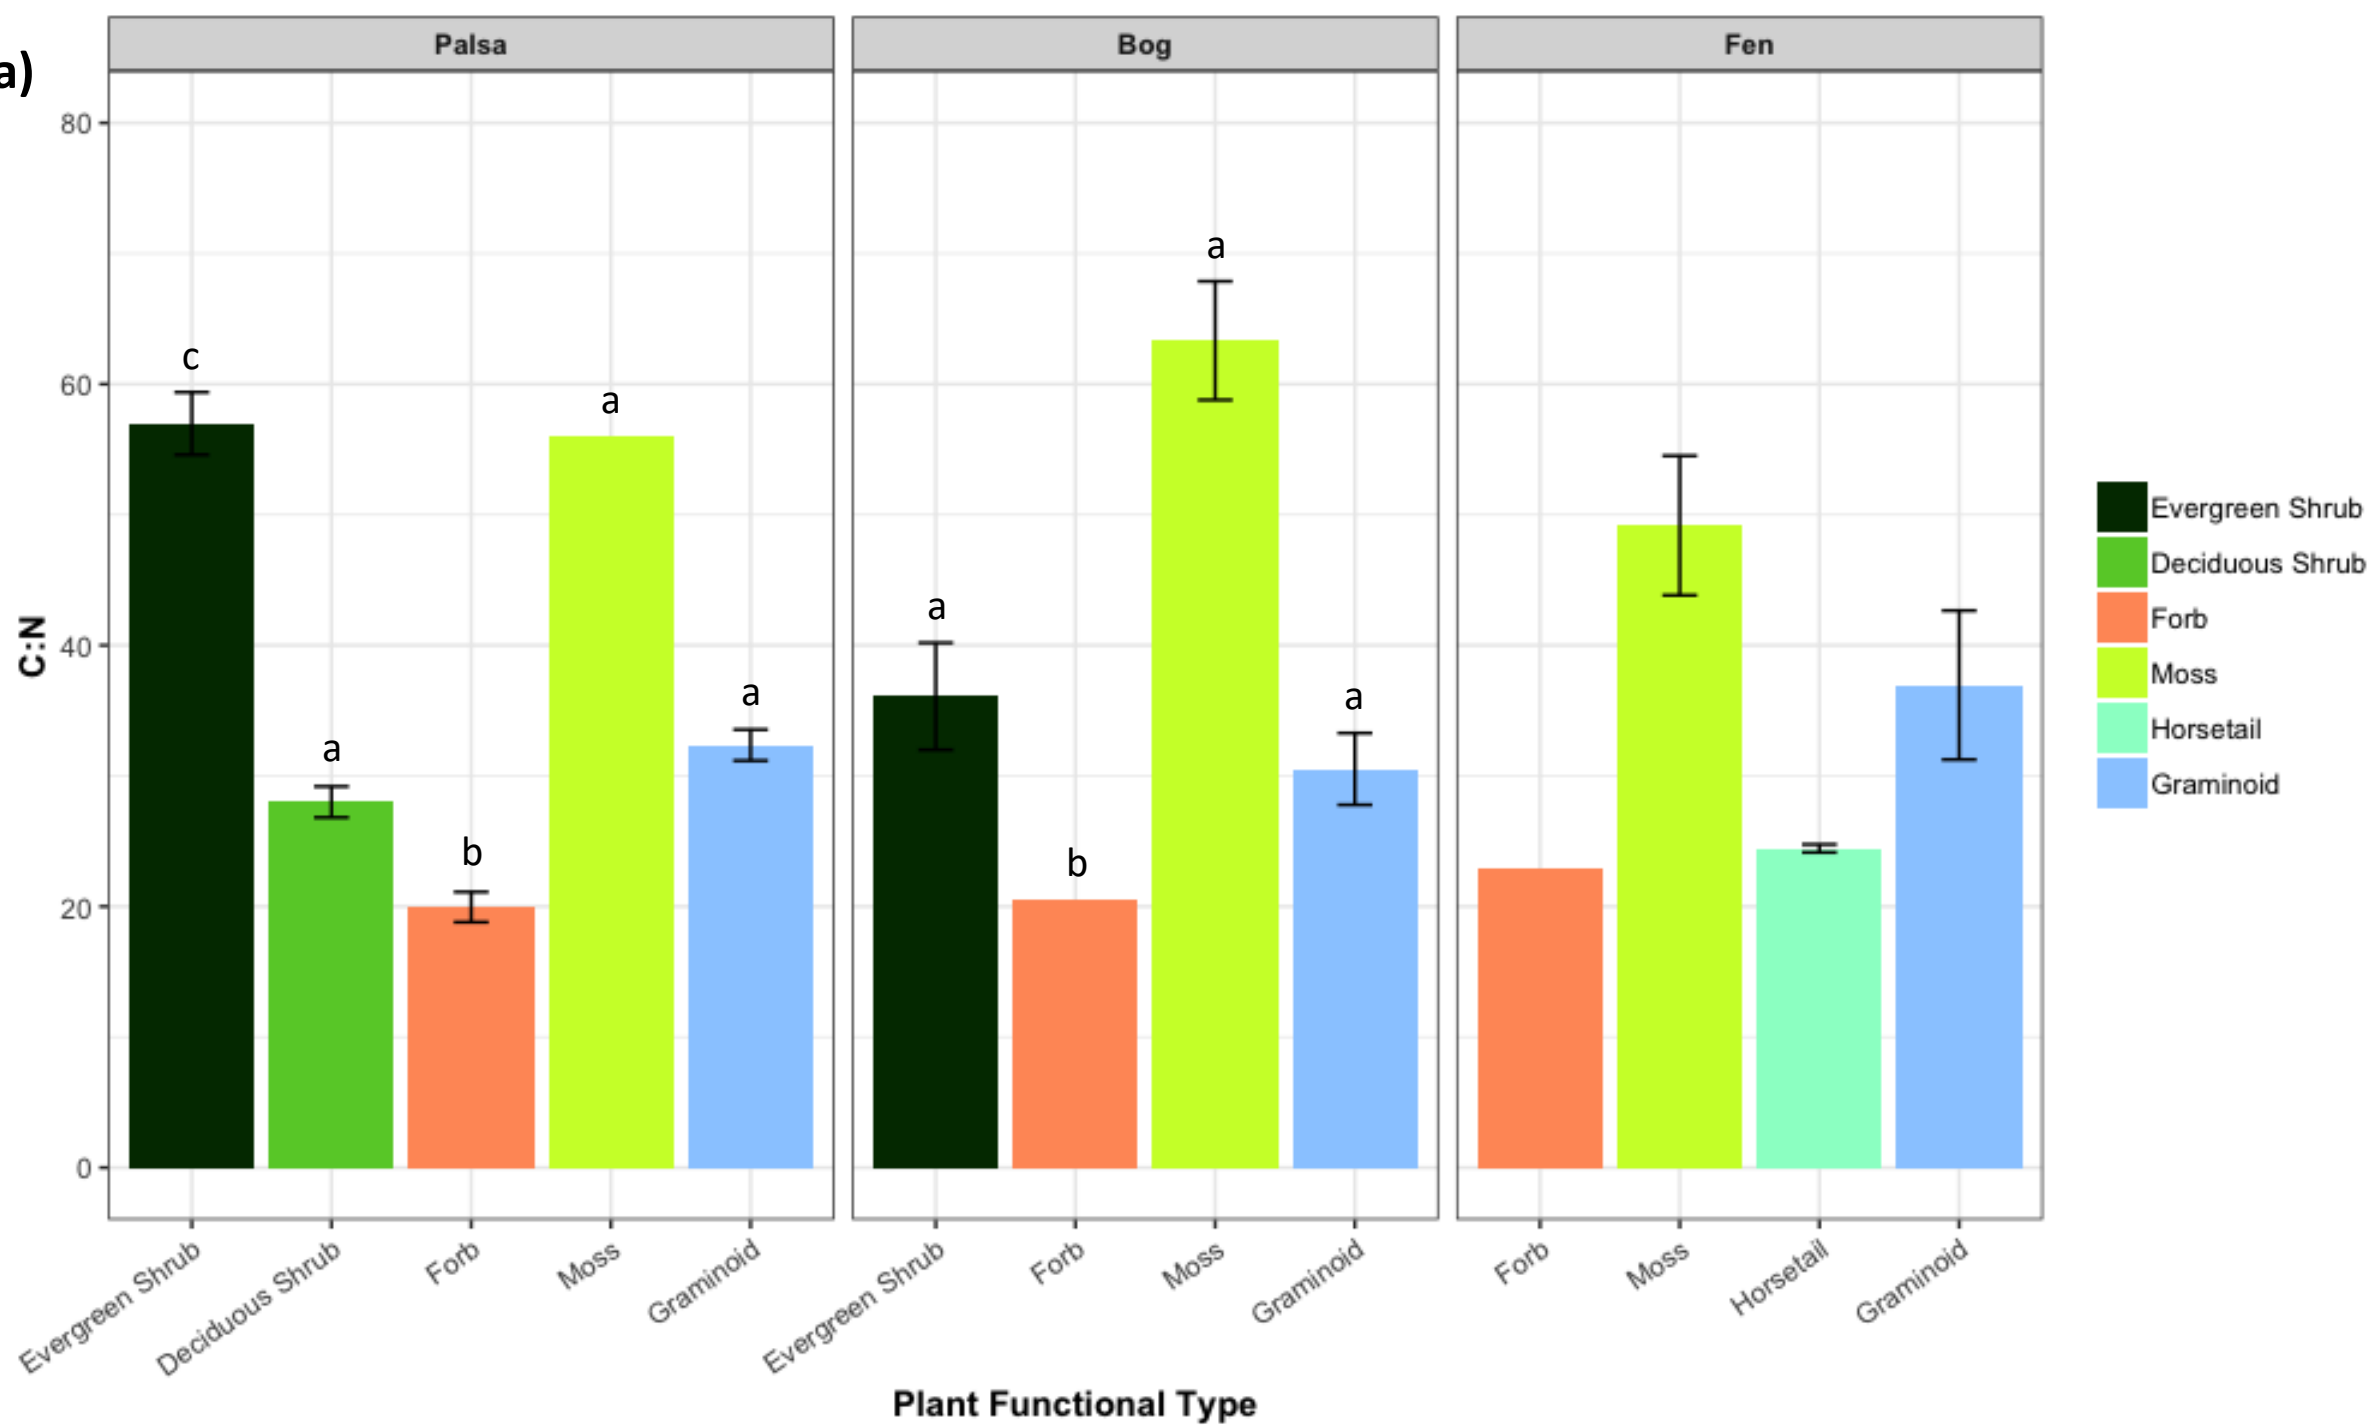

**b)**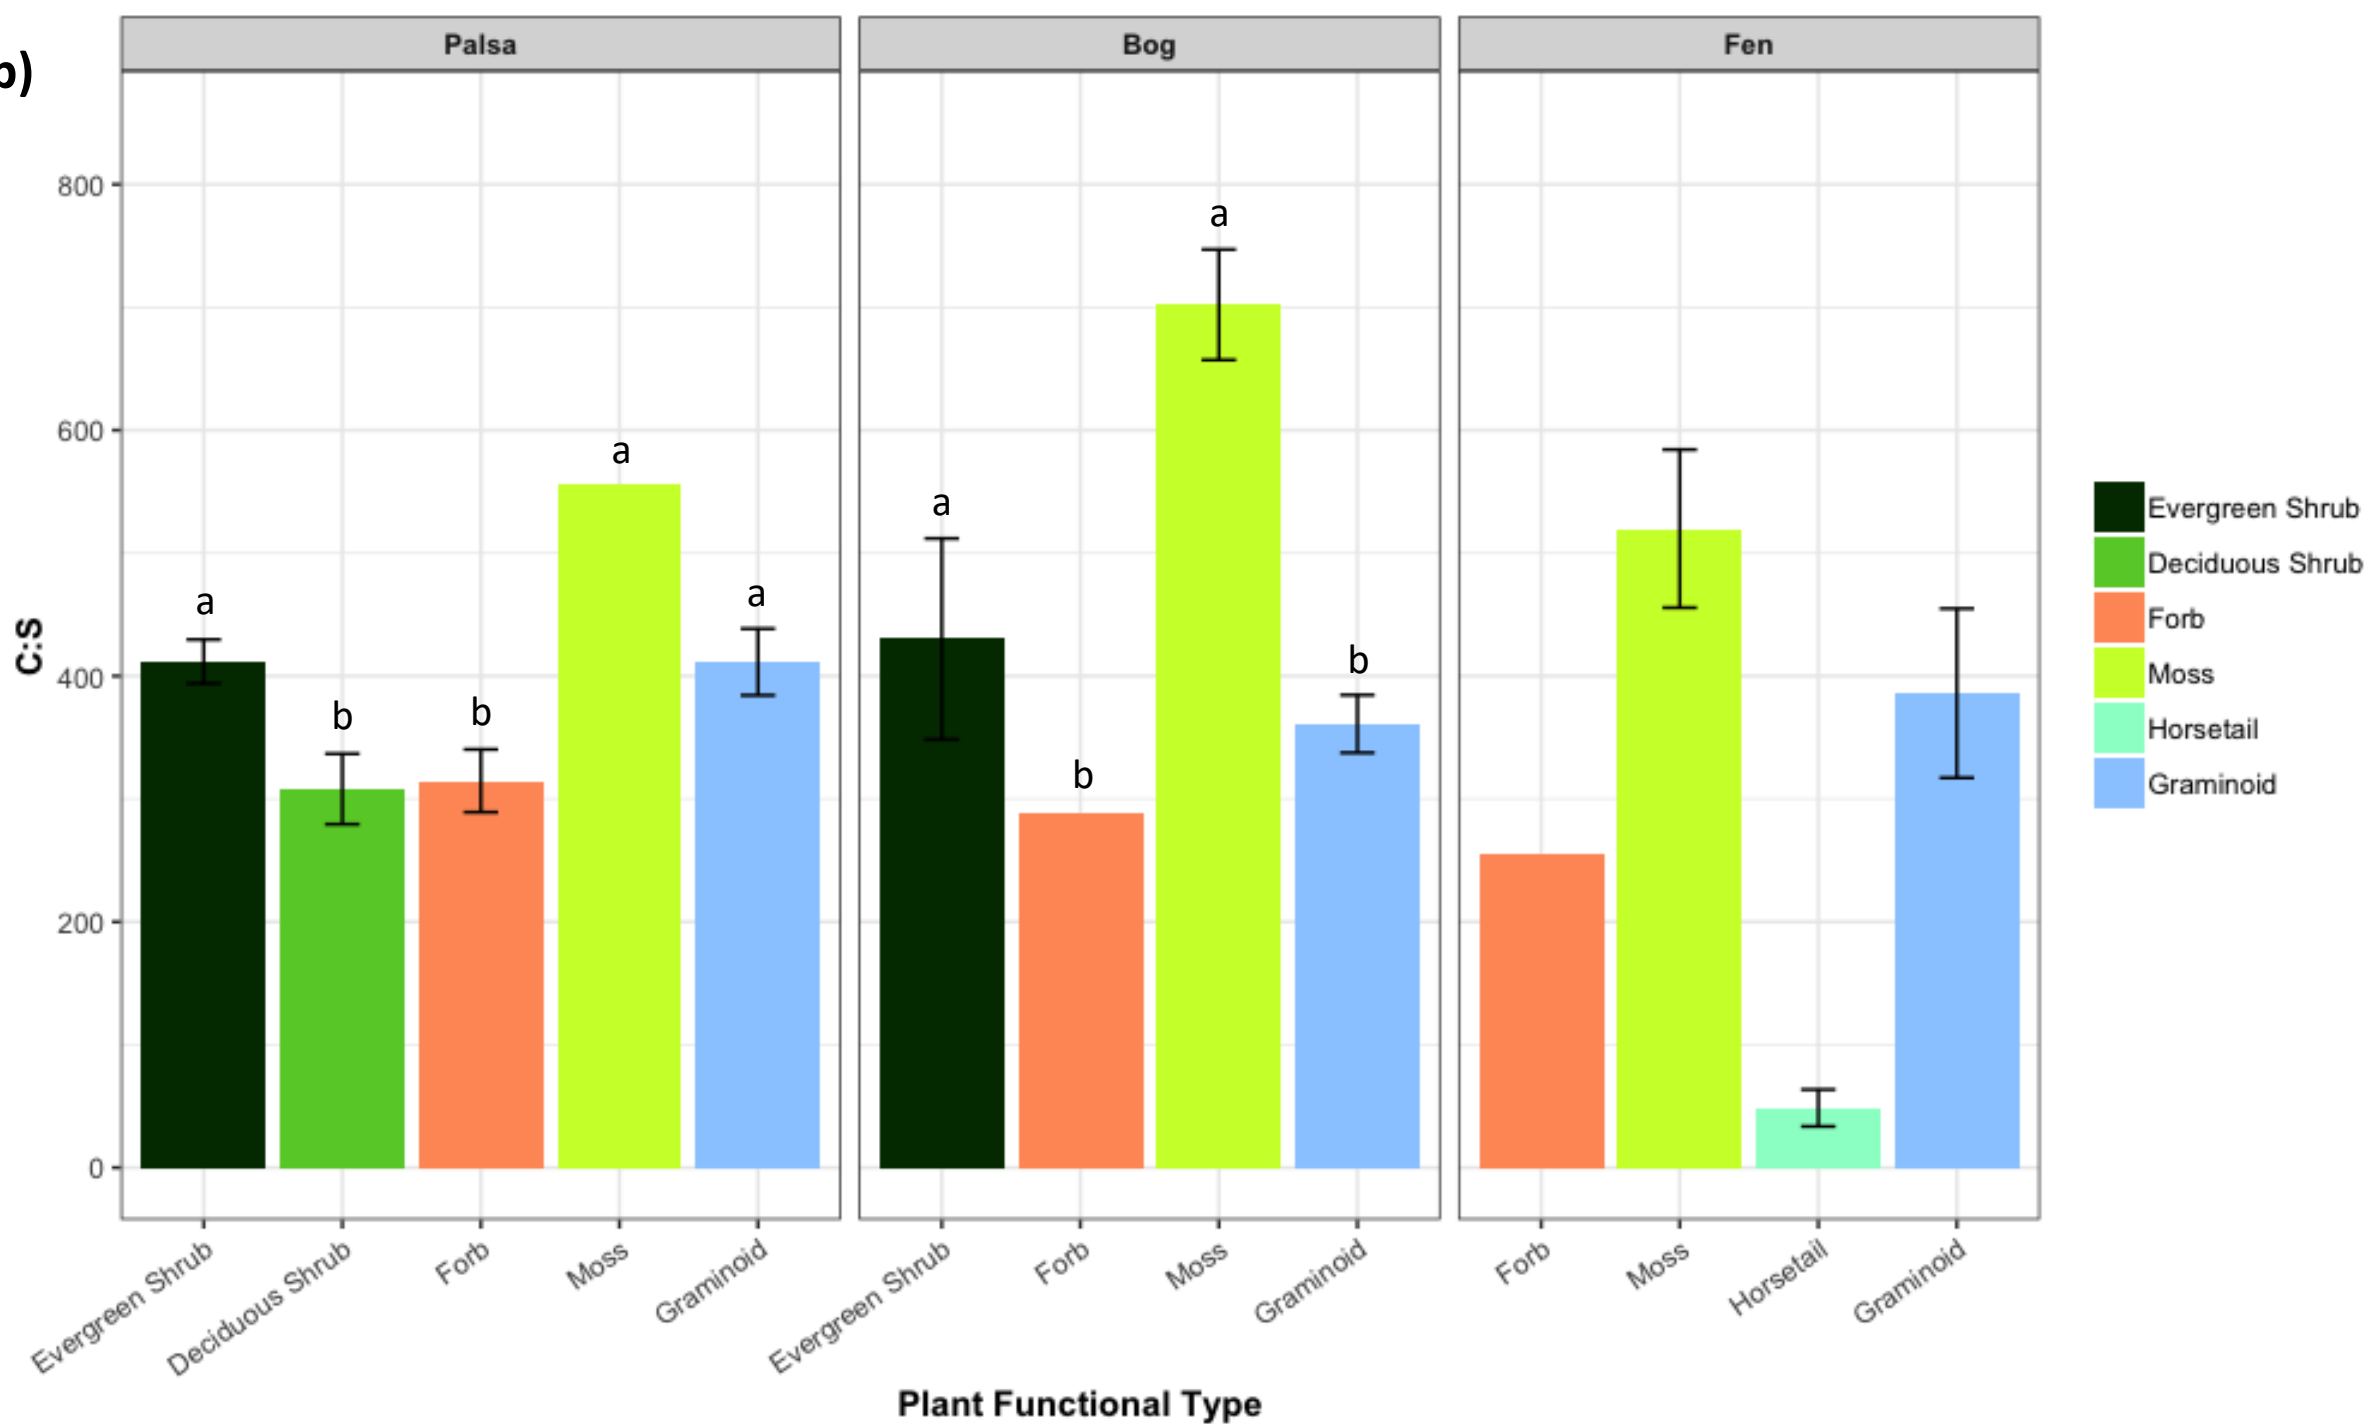

c)

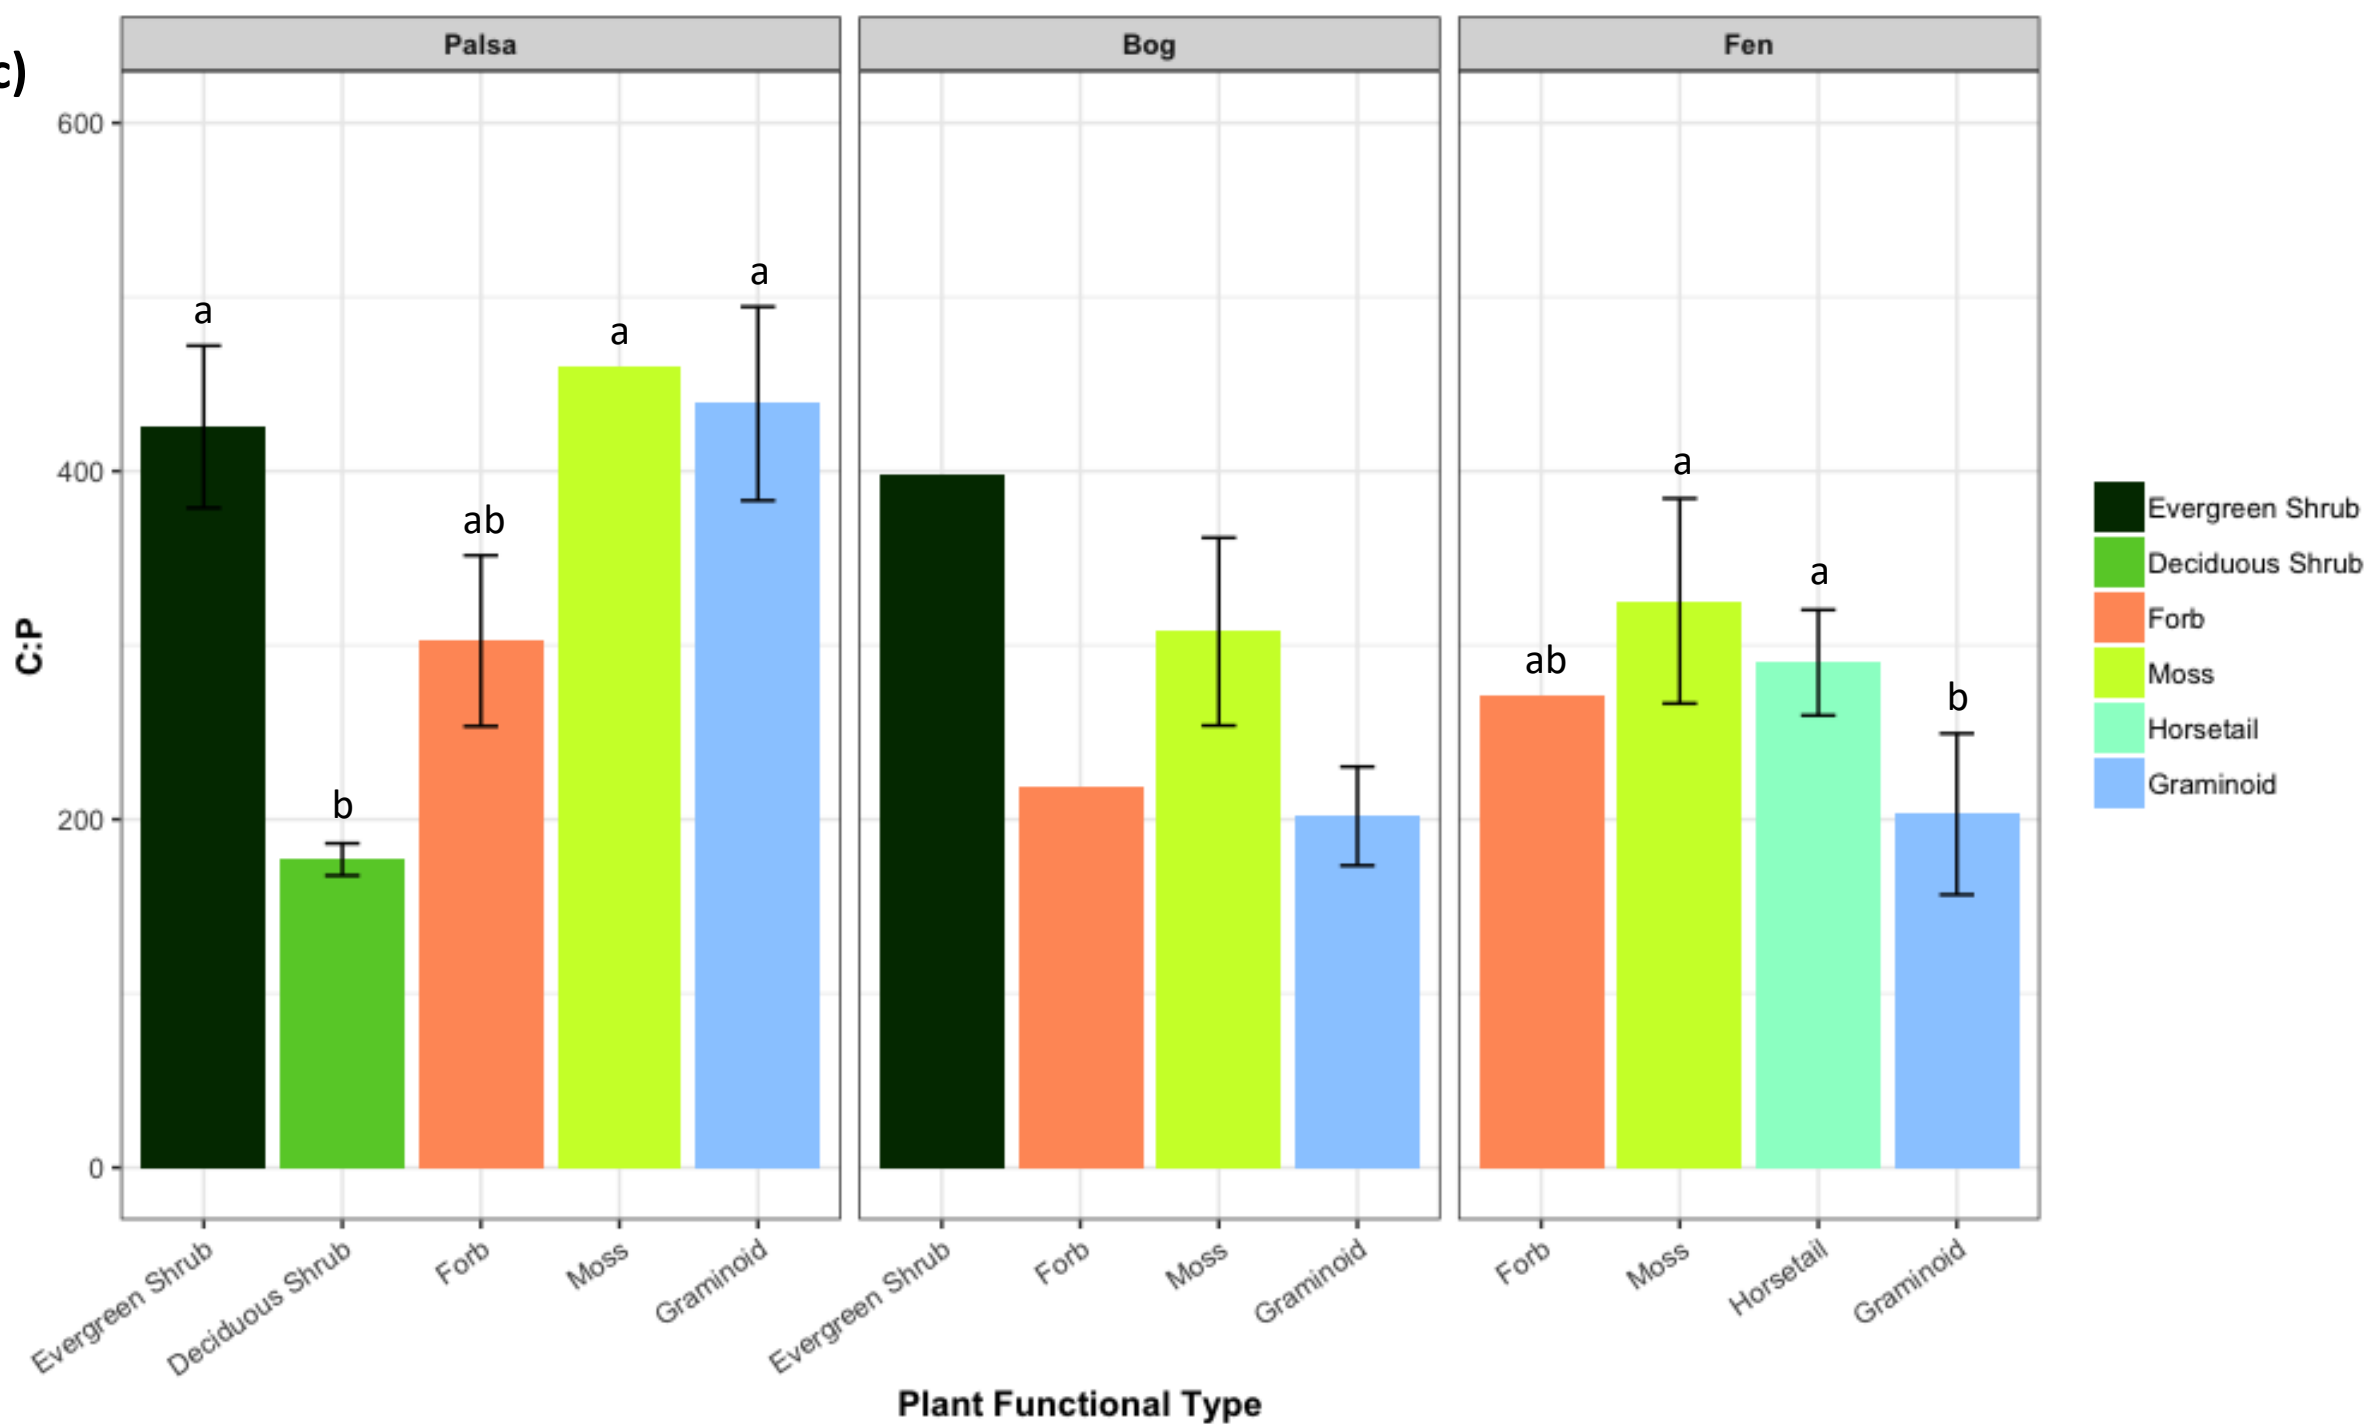

d)

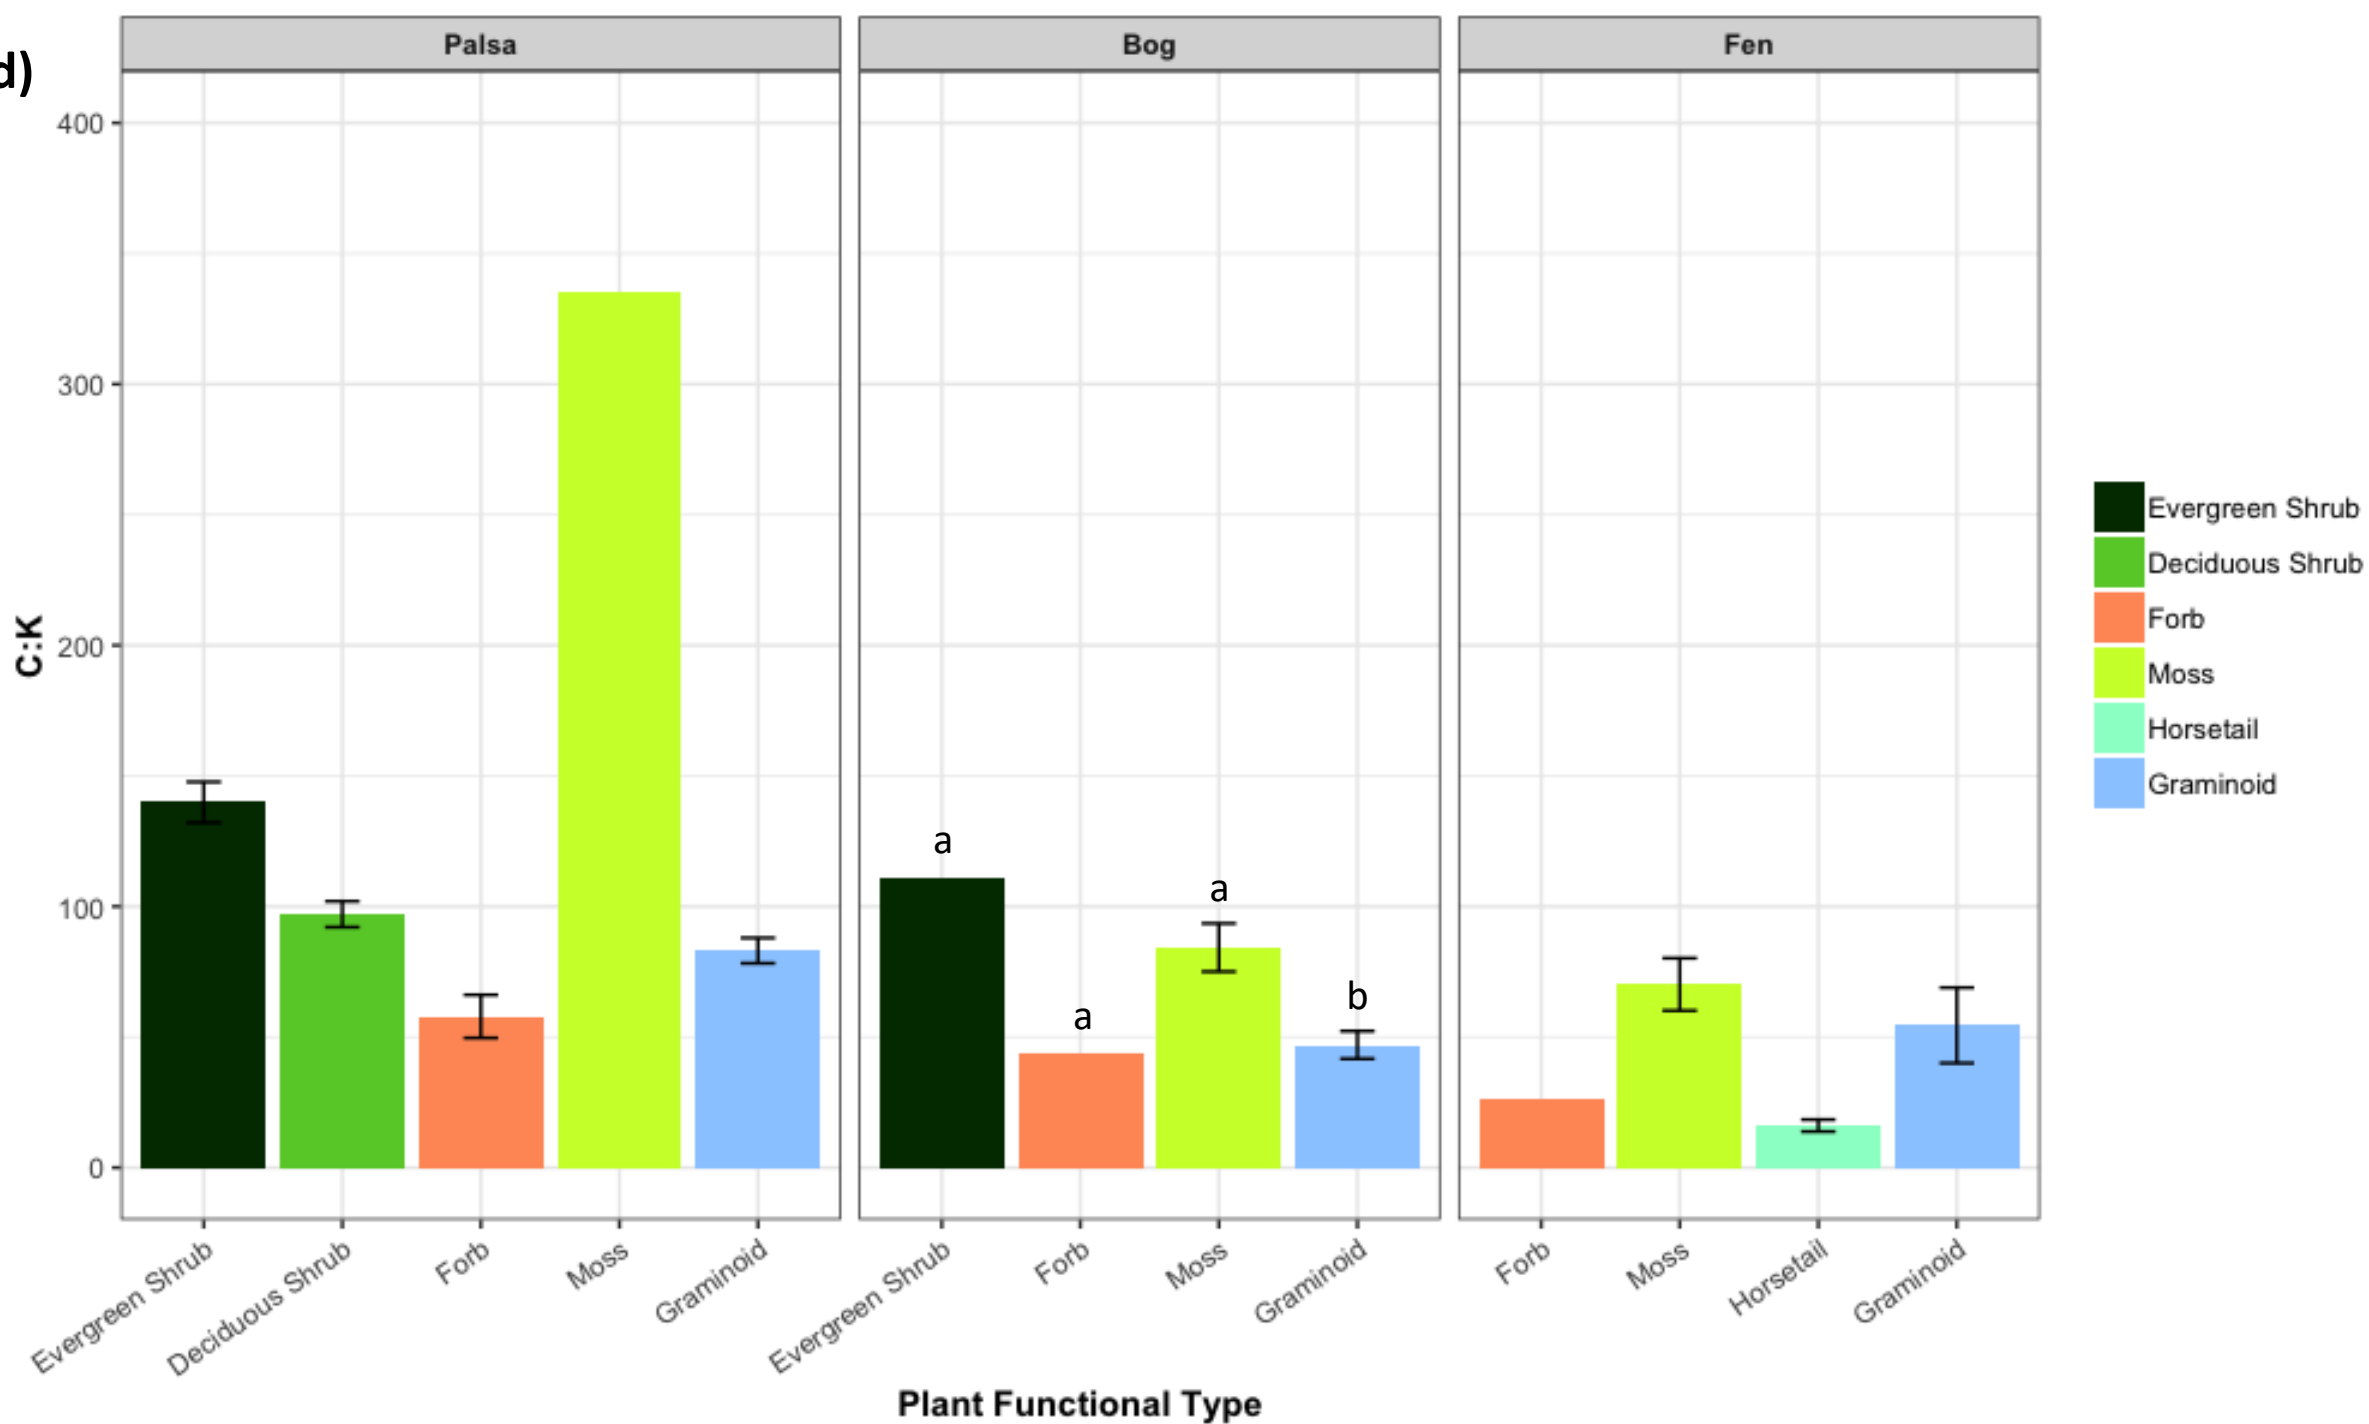

# Figure S5: Litter Stoichiometry of pfts

a)

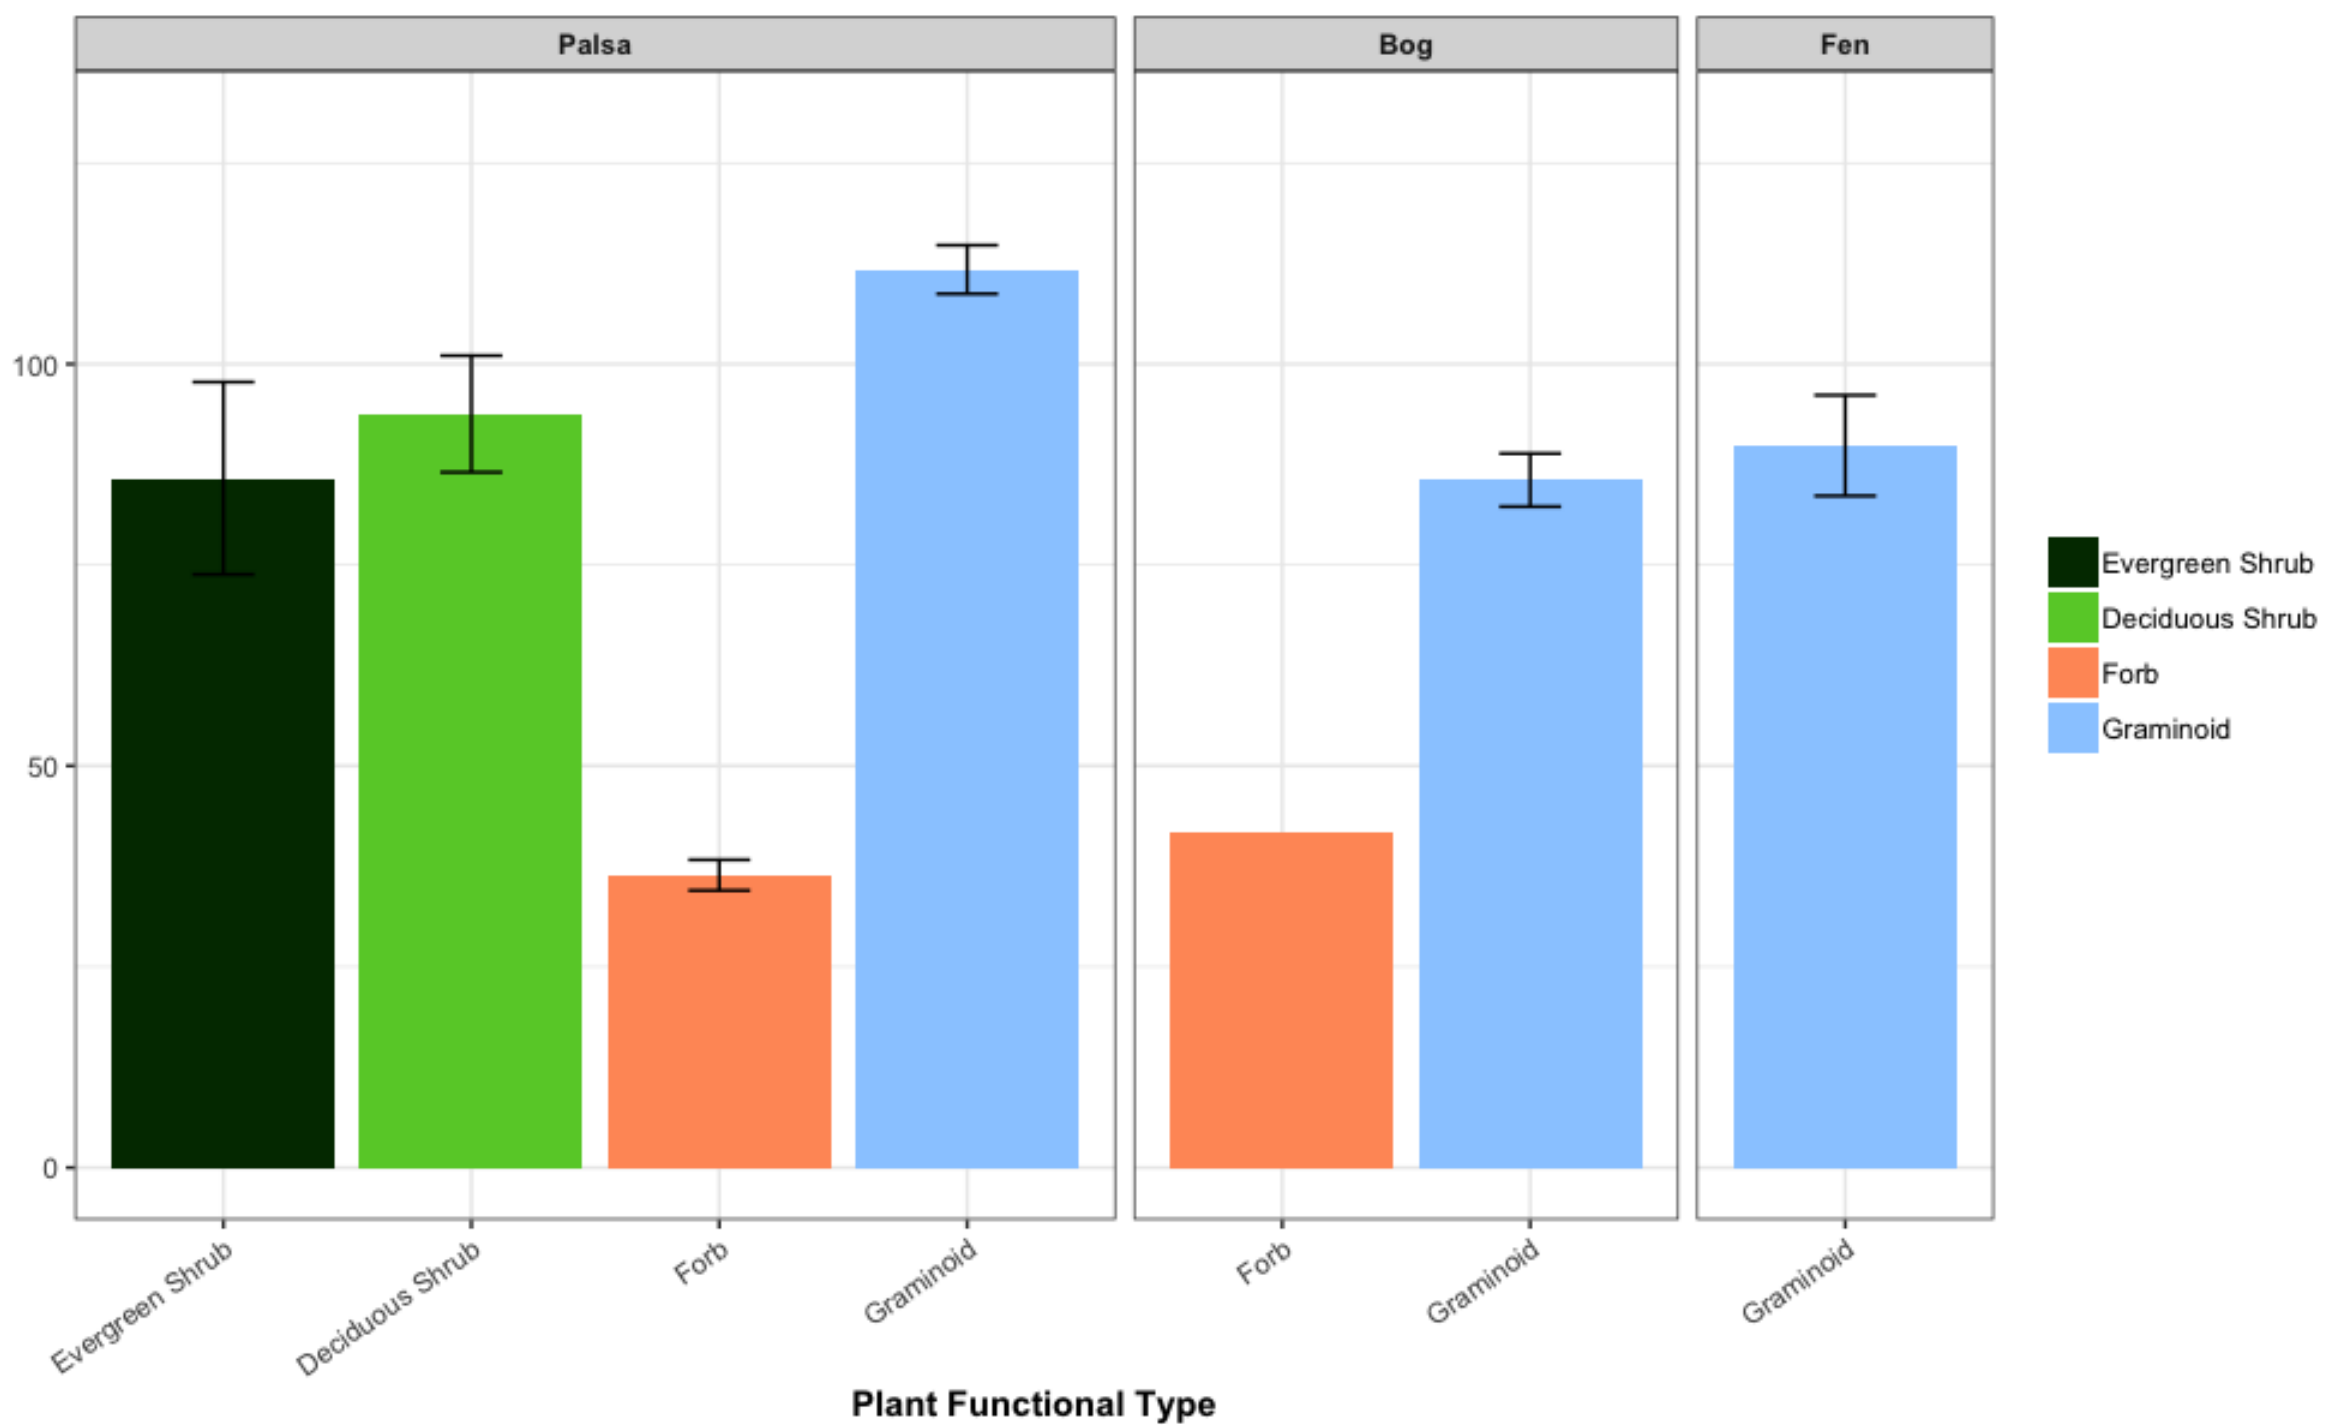

**b)**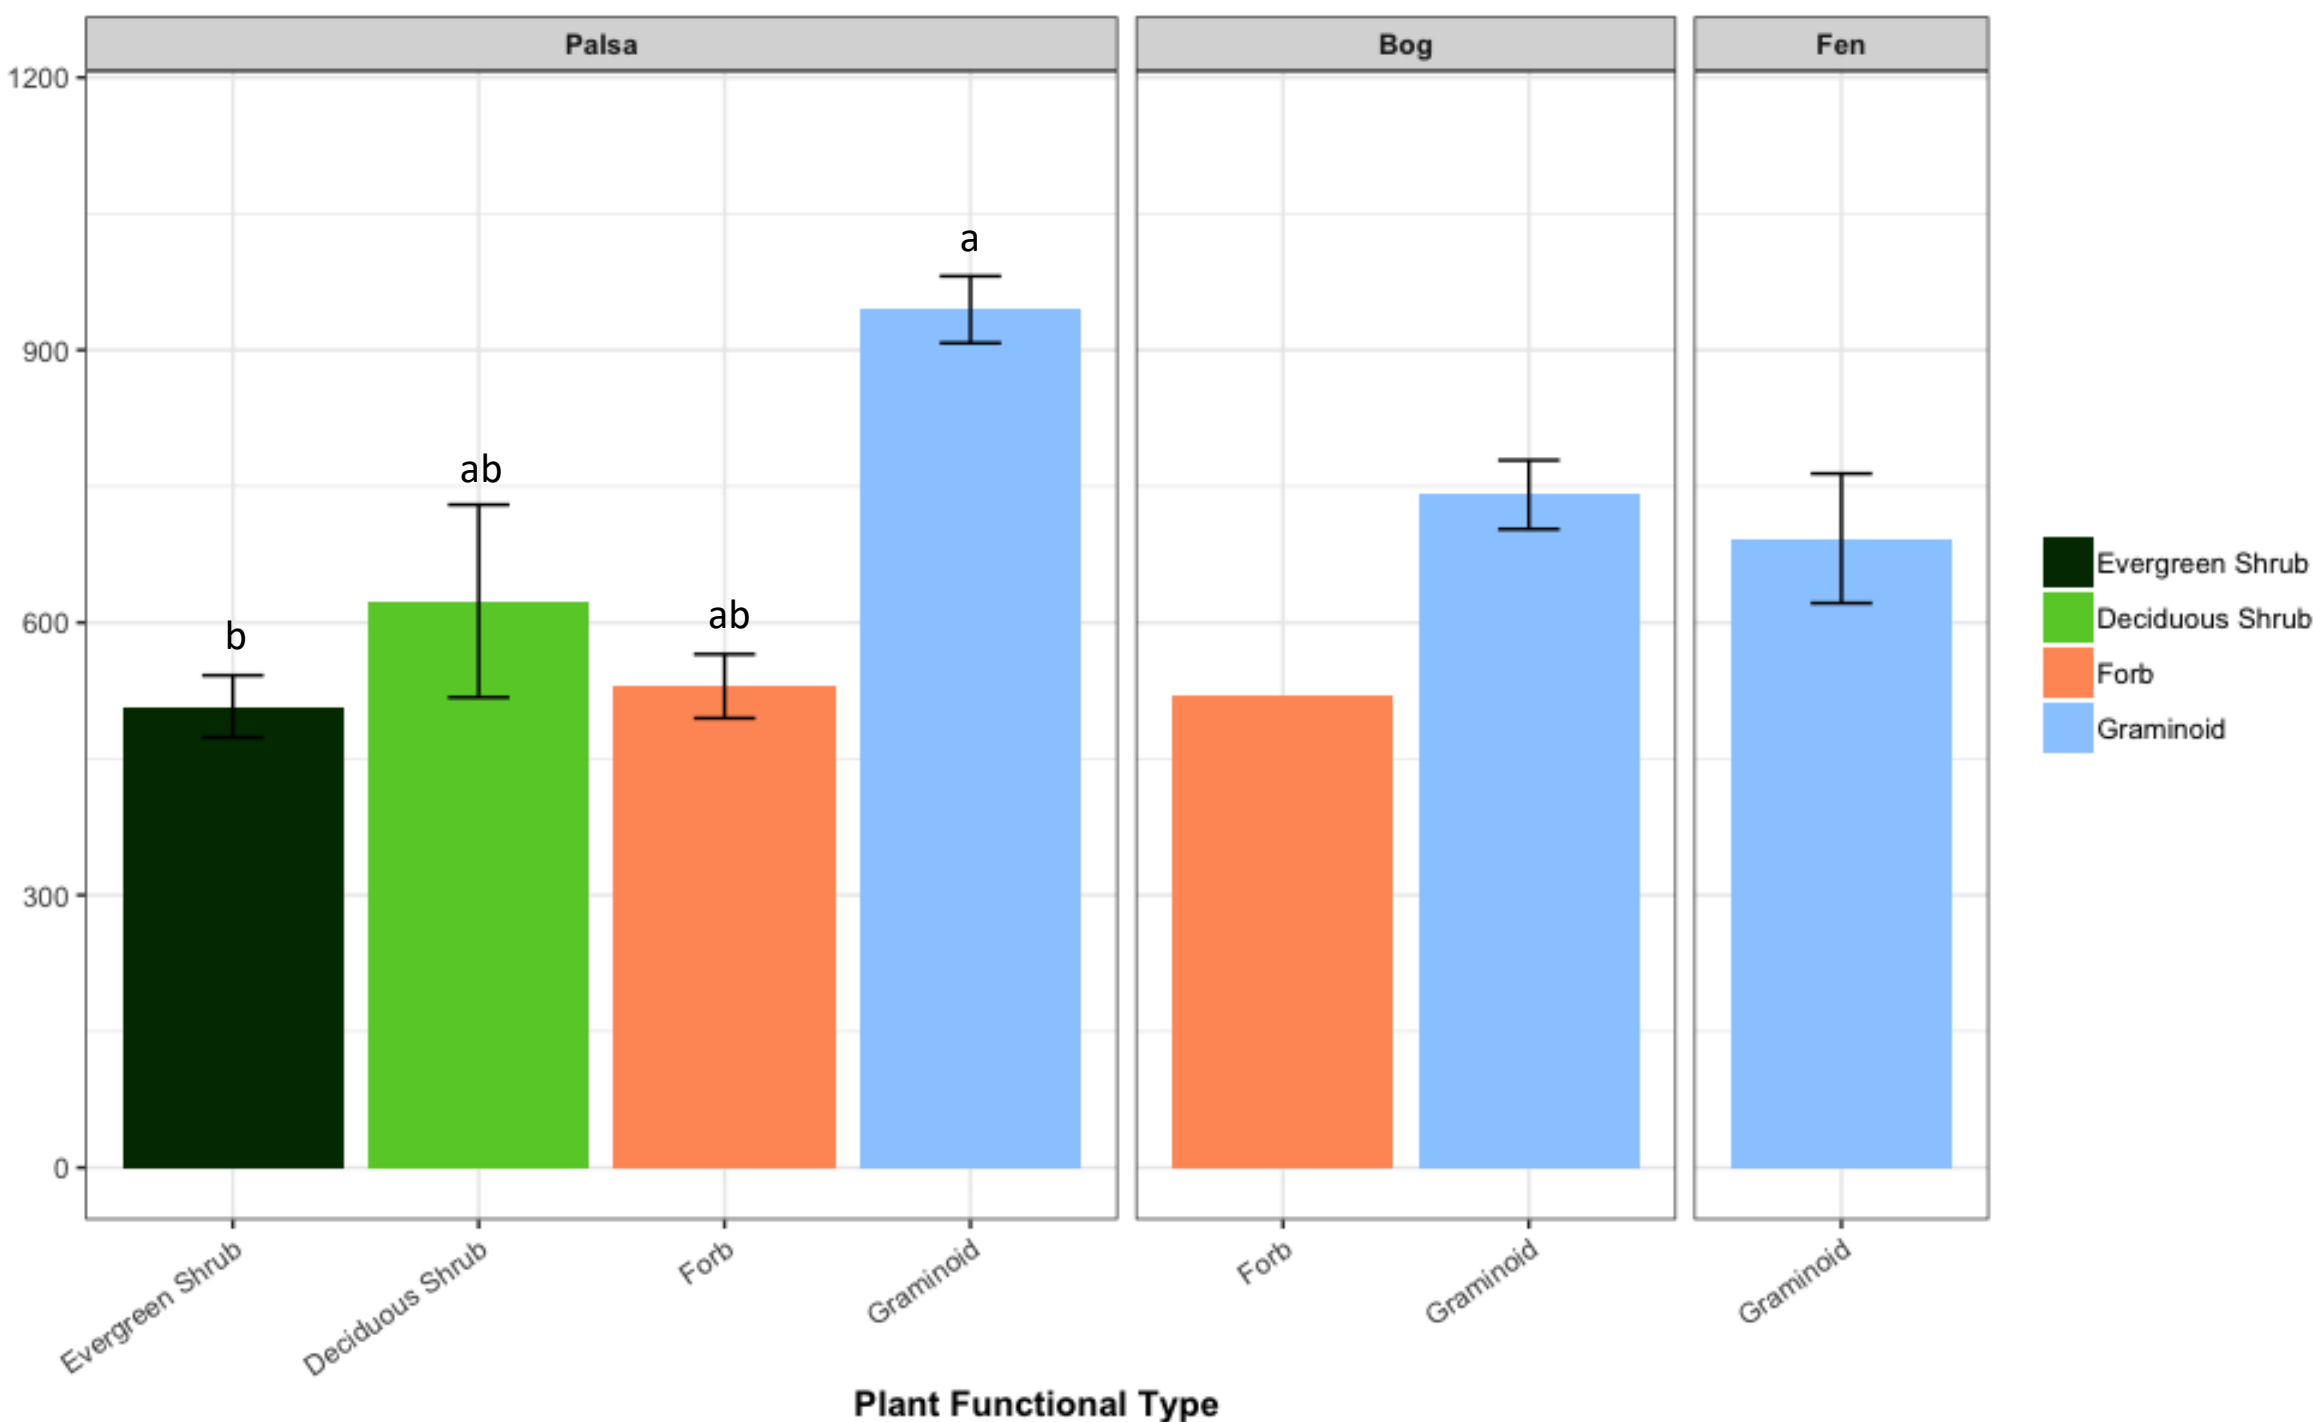



c)

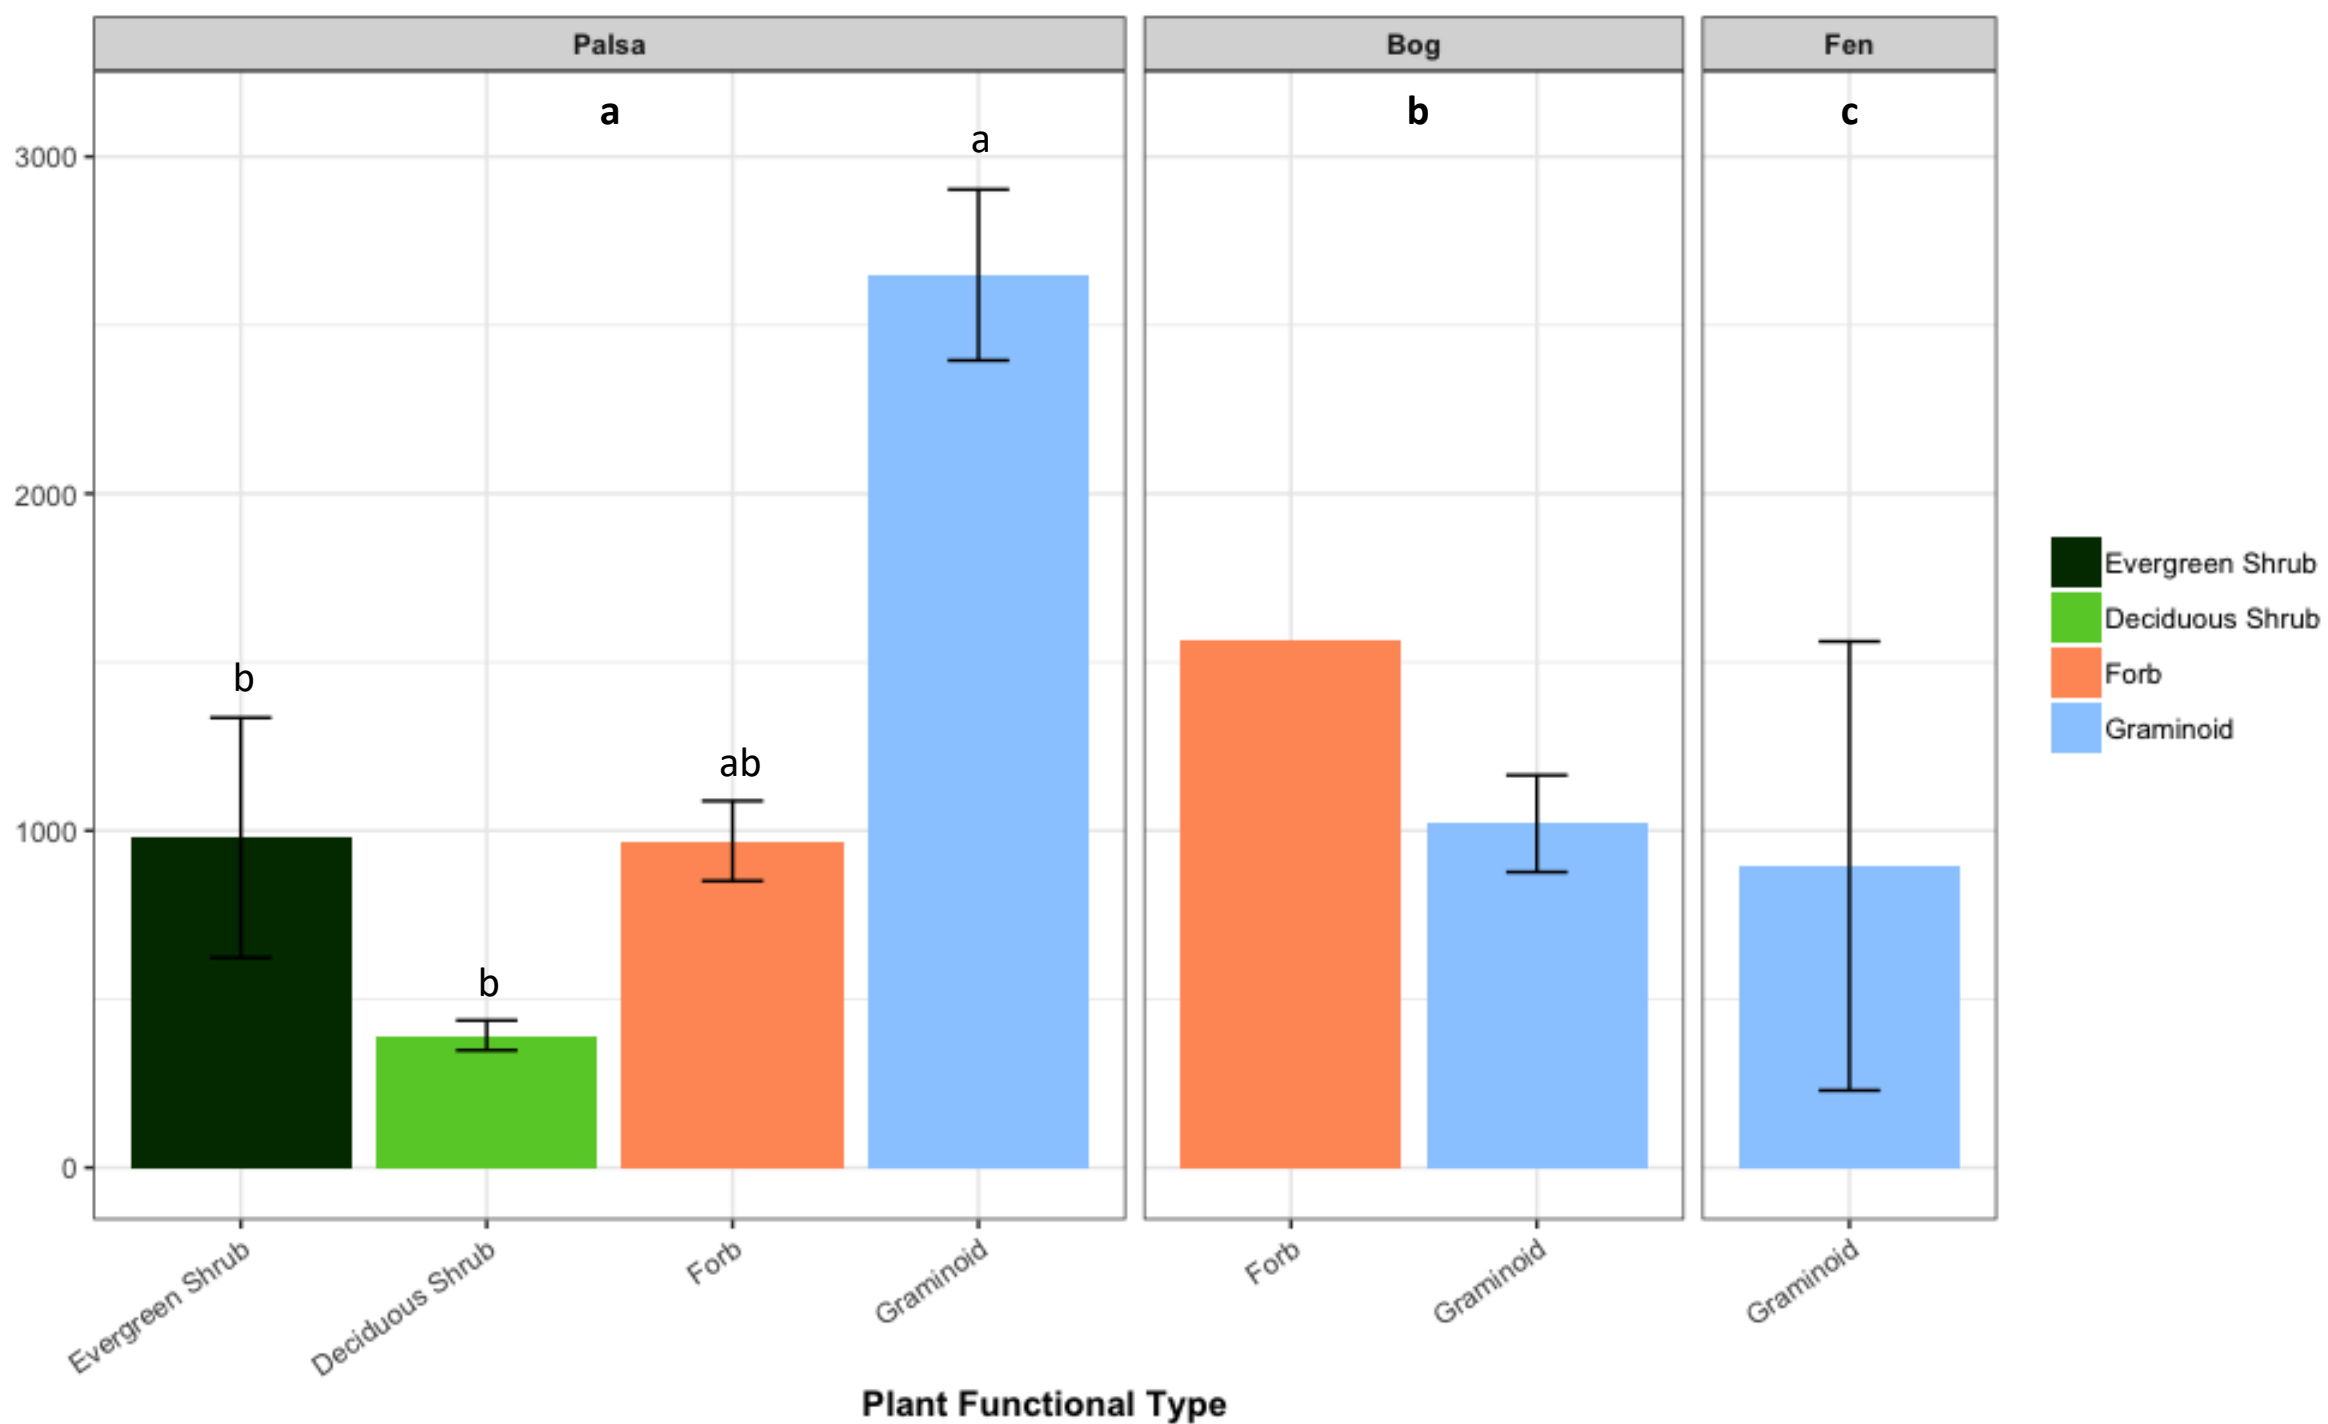

d)

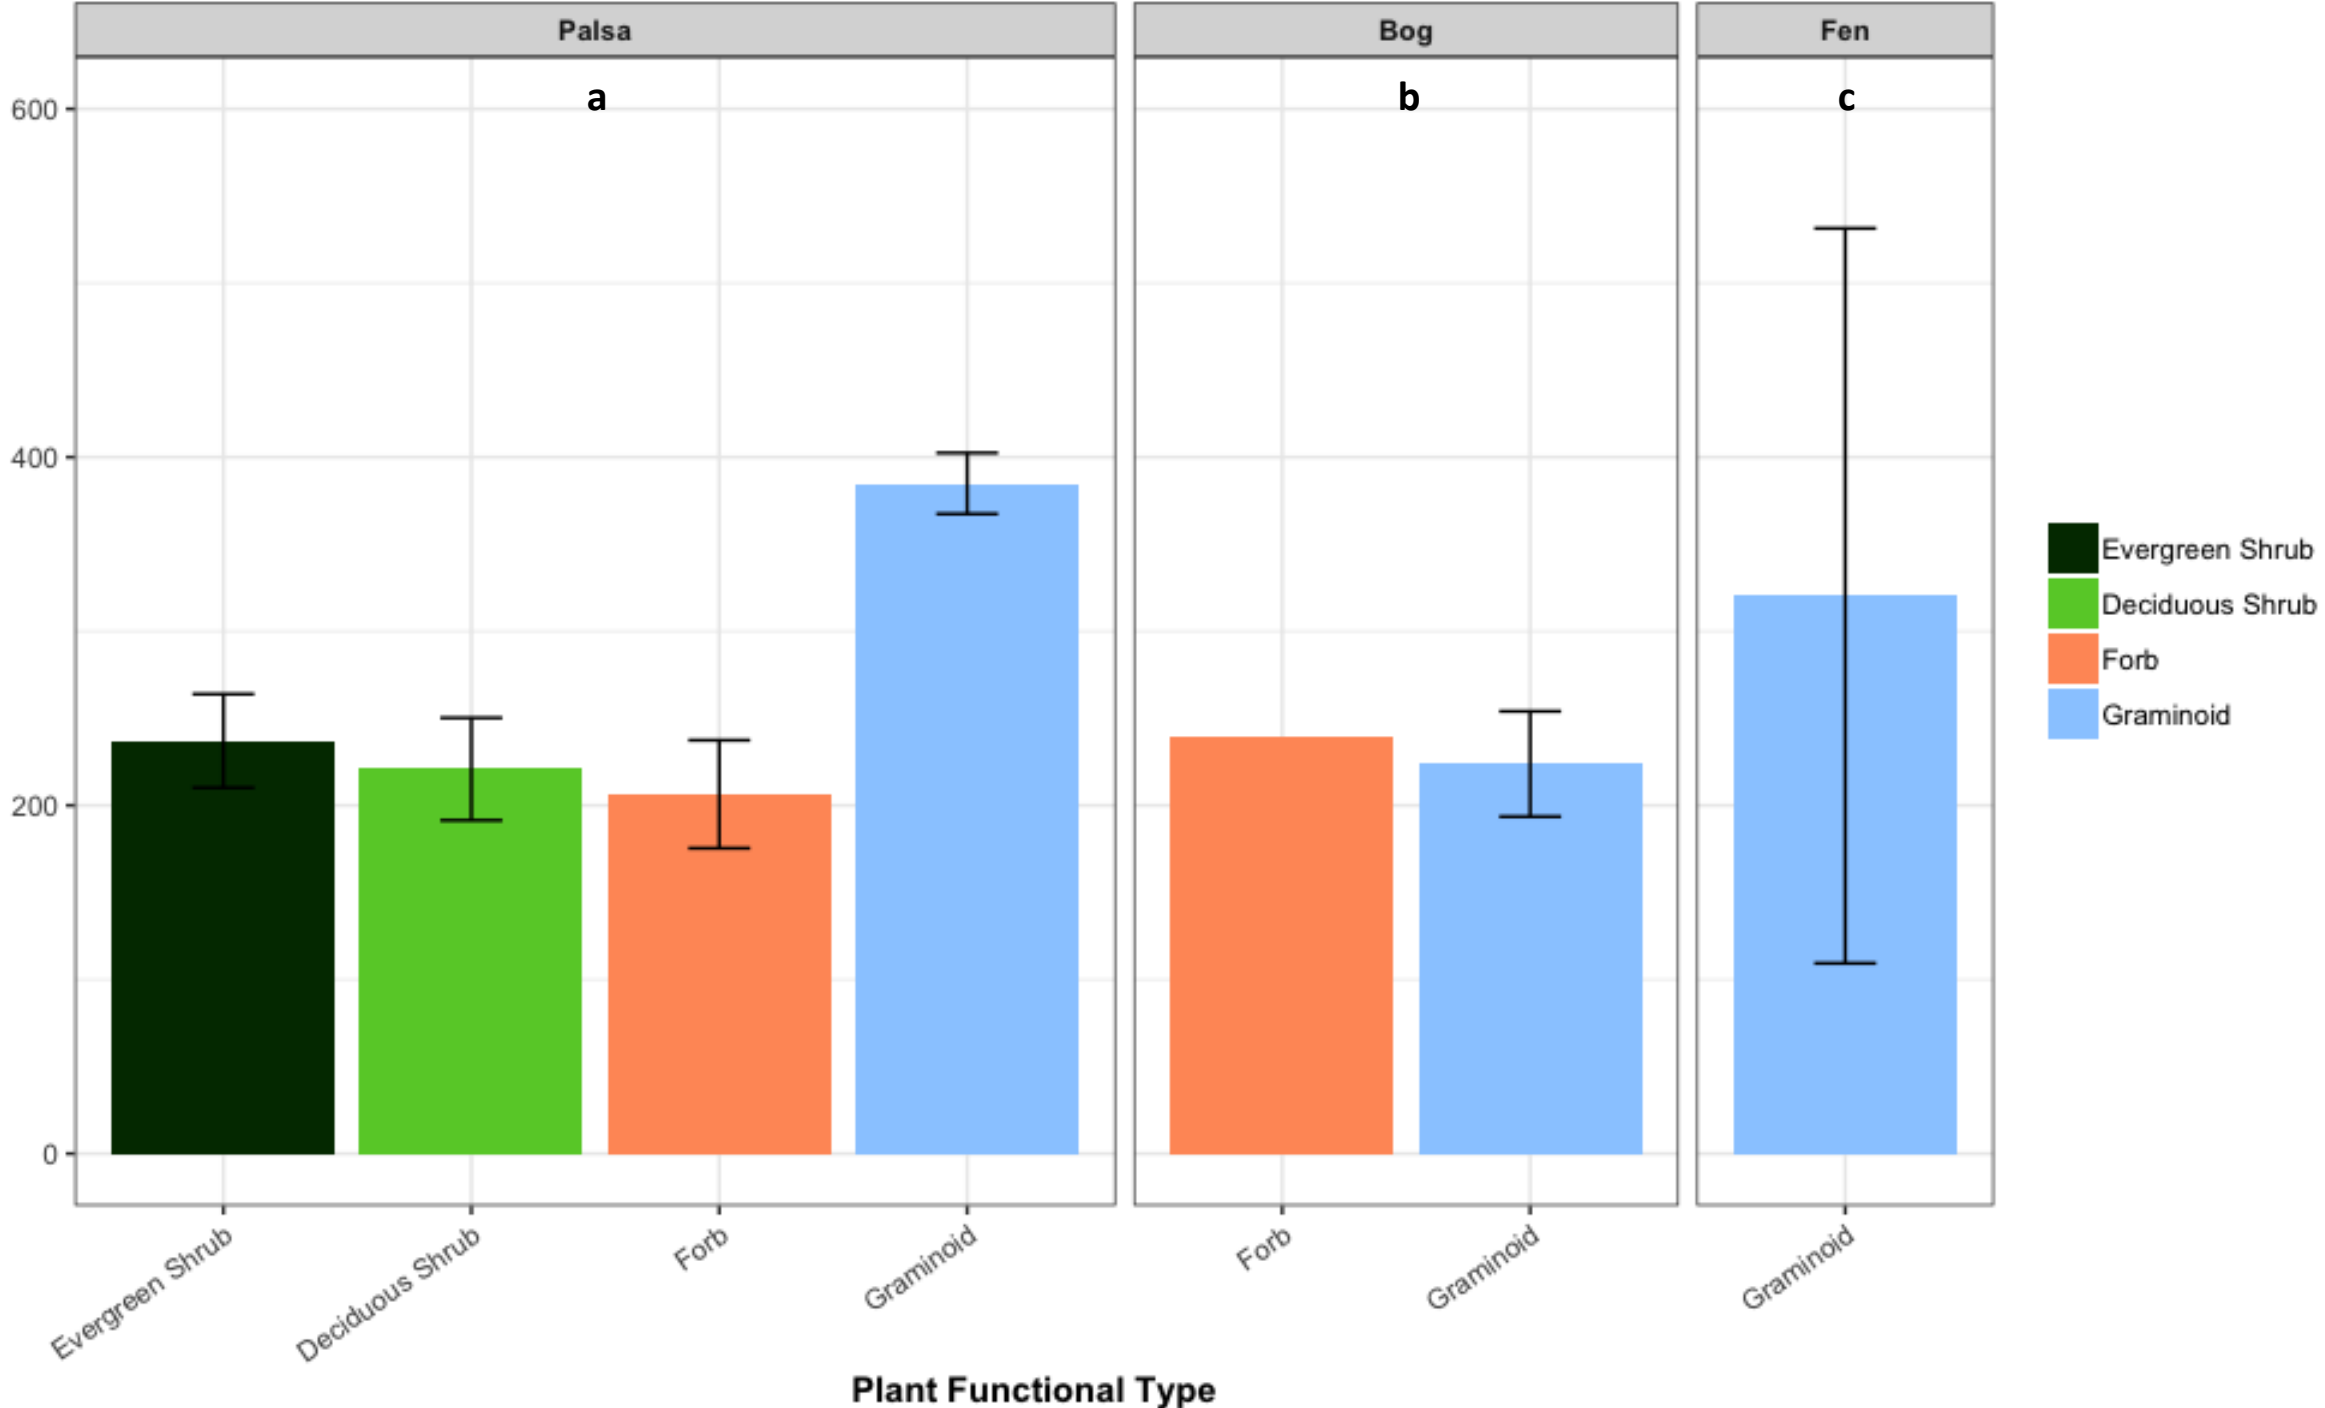

# Figure S6: Root stoichiometry of pfts

a)

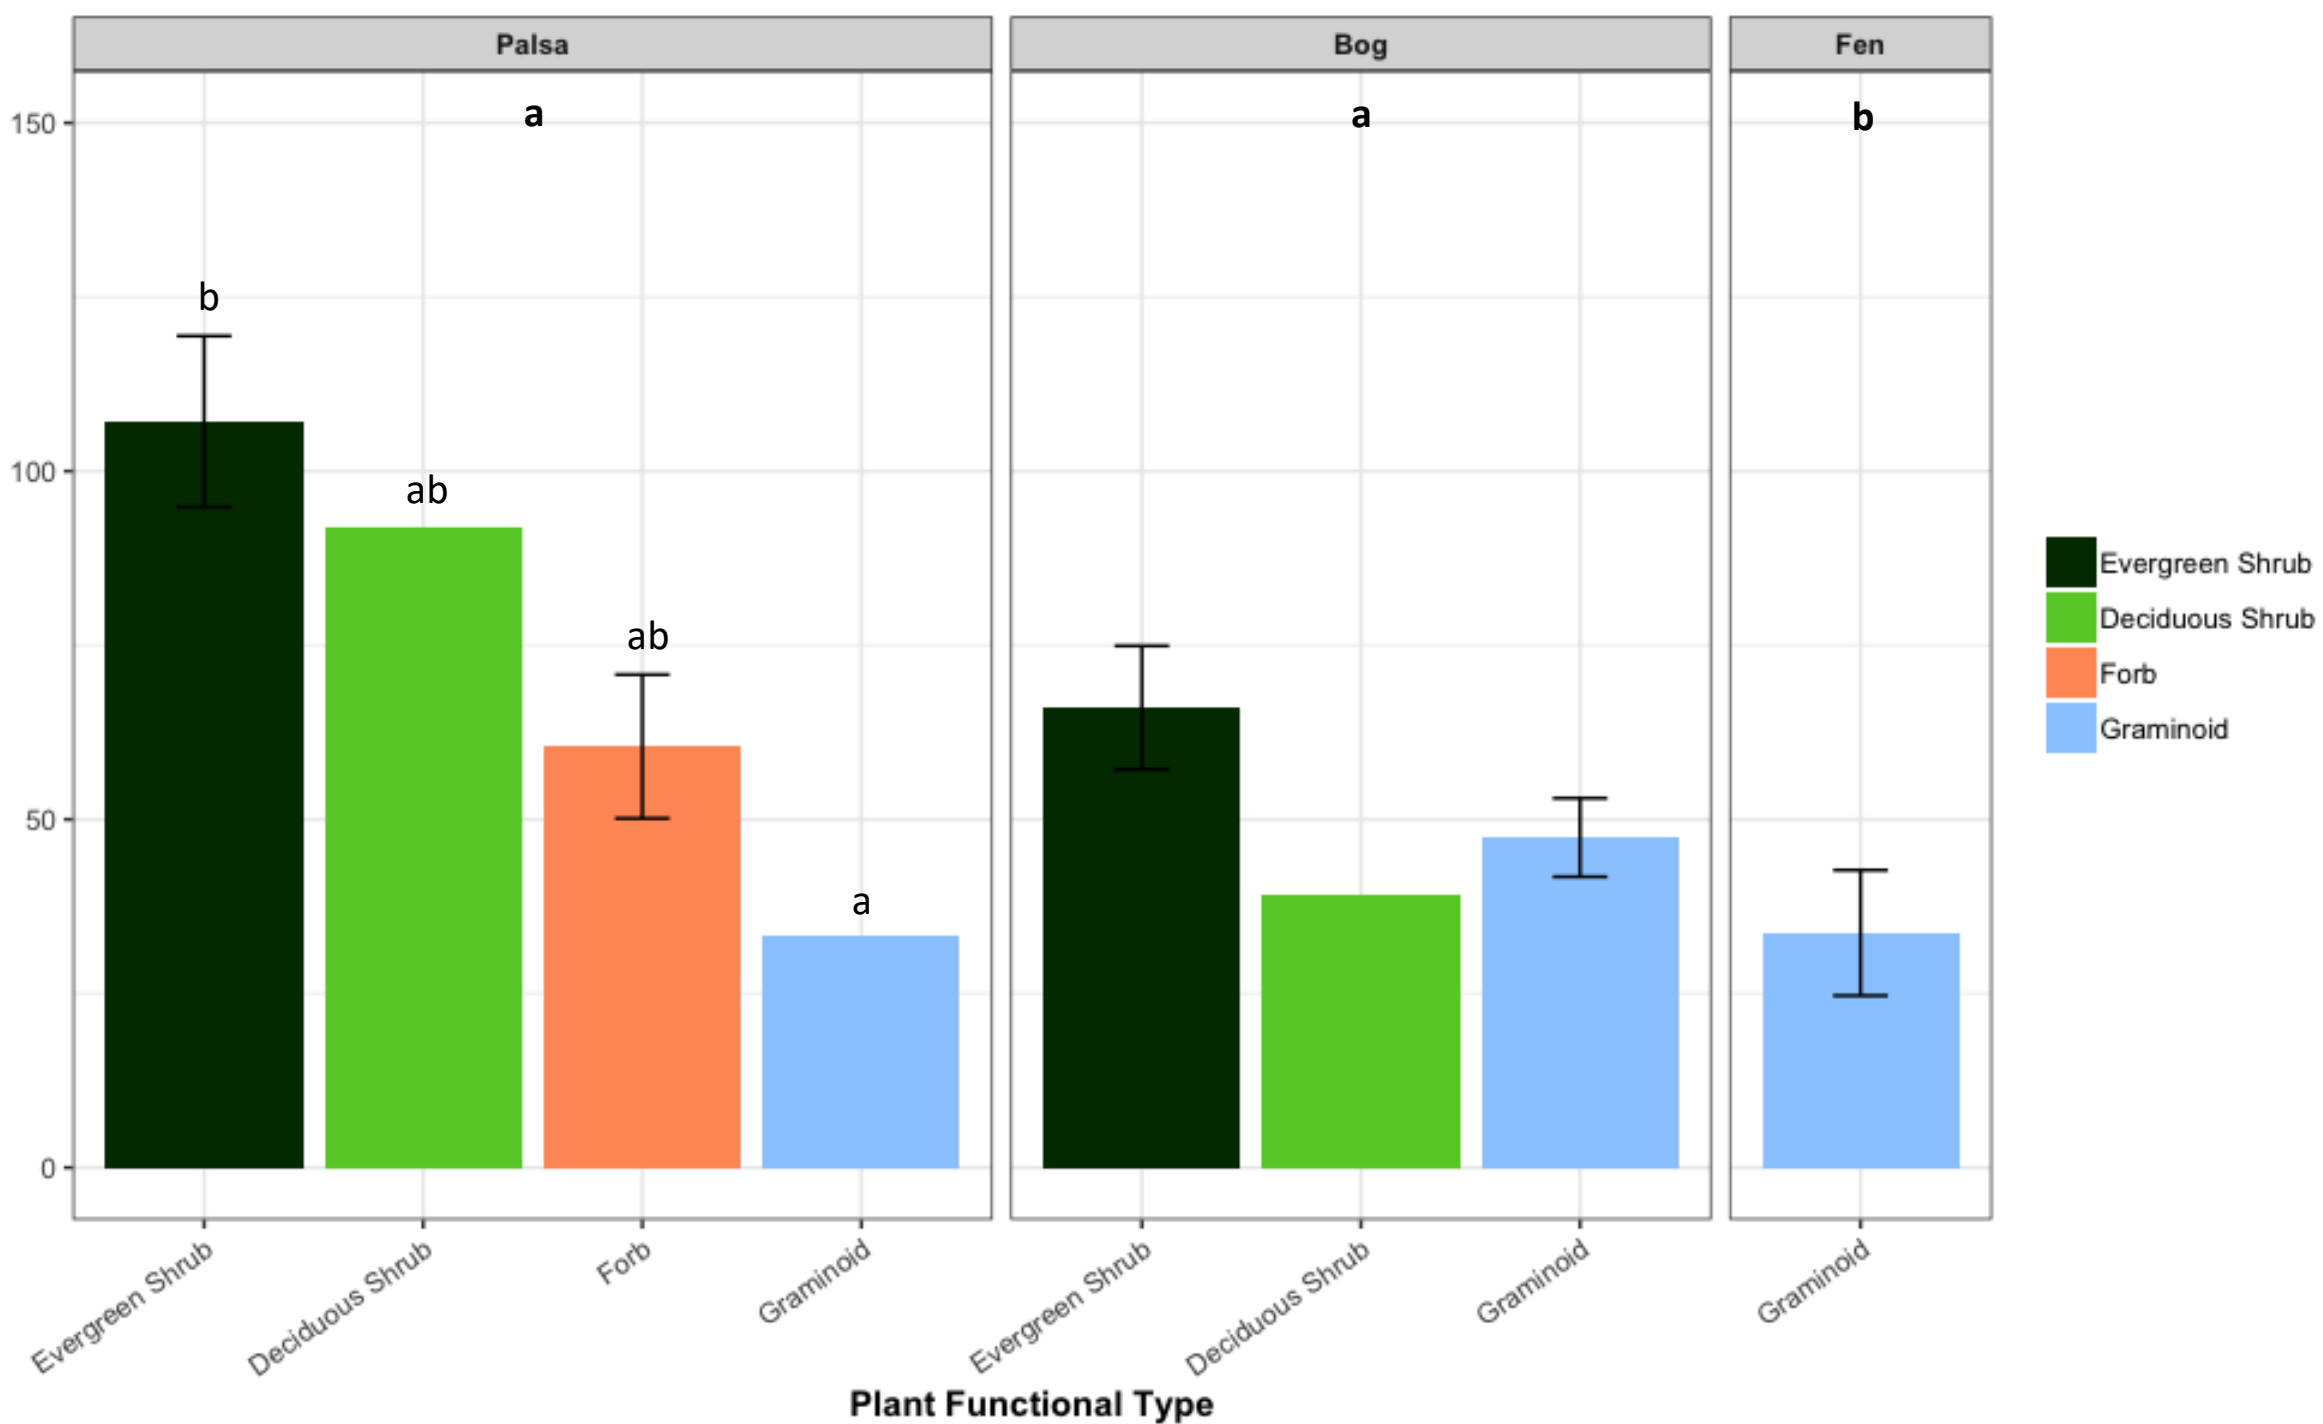

**b)**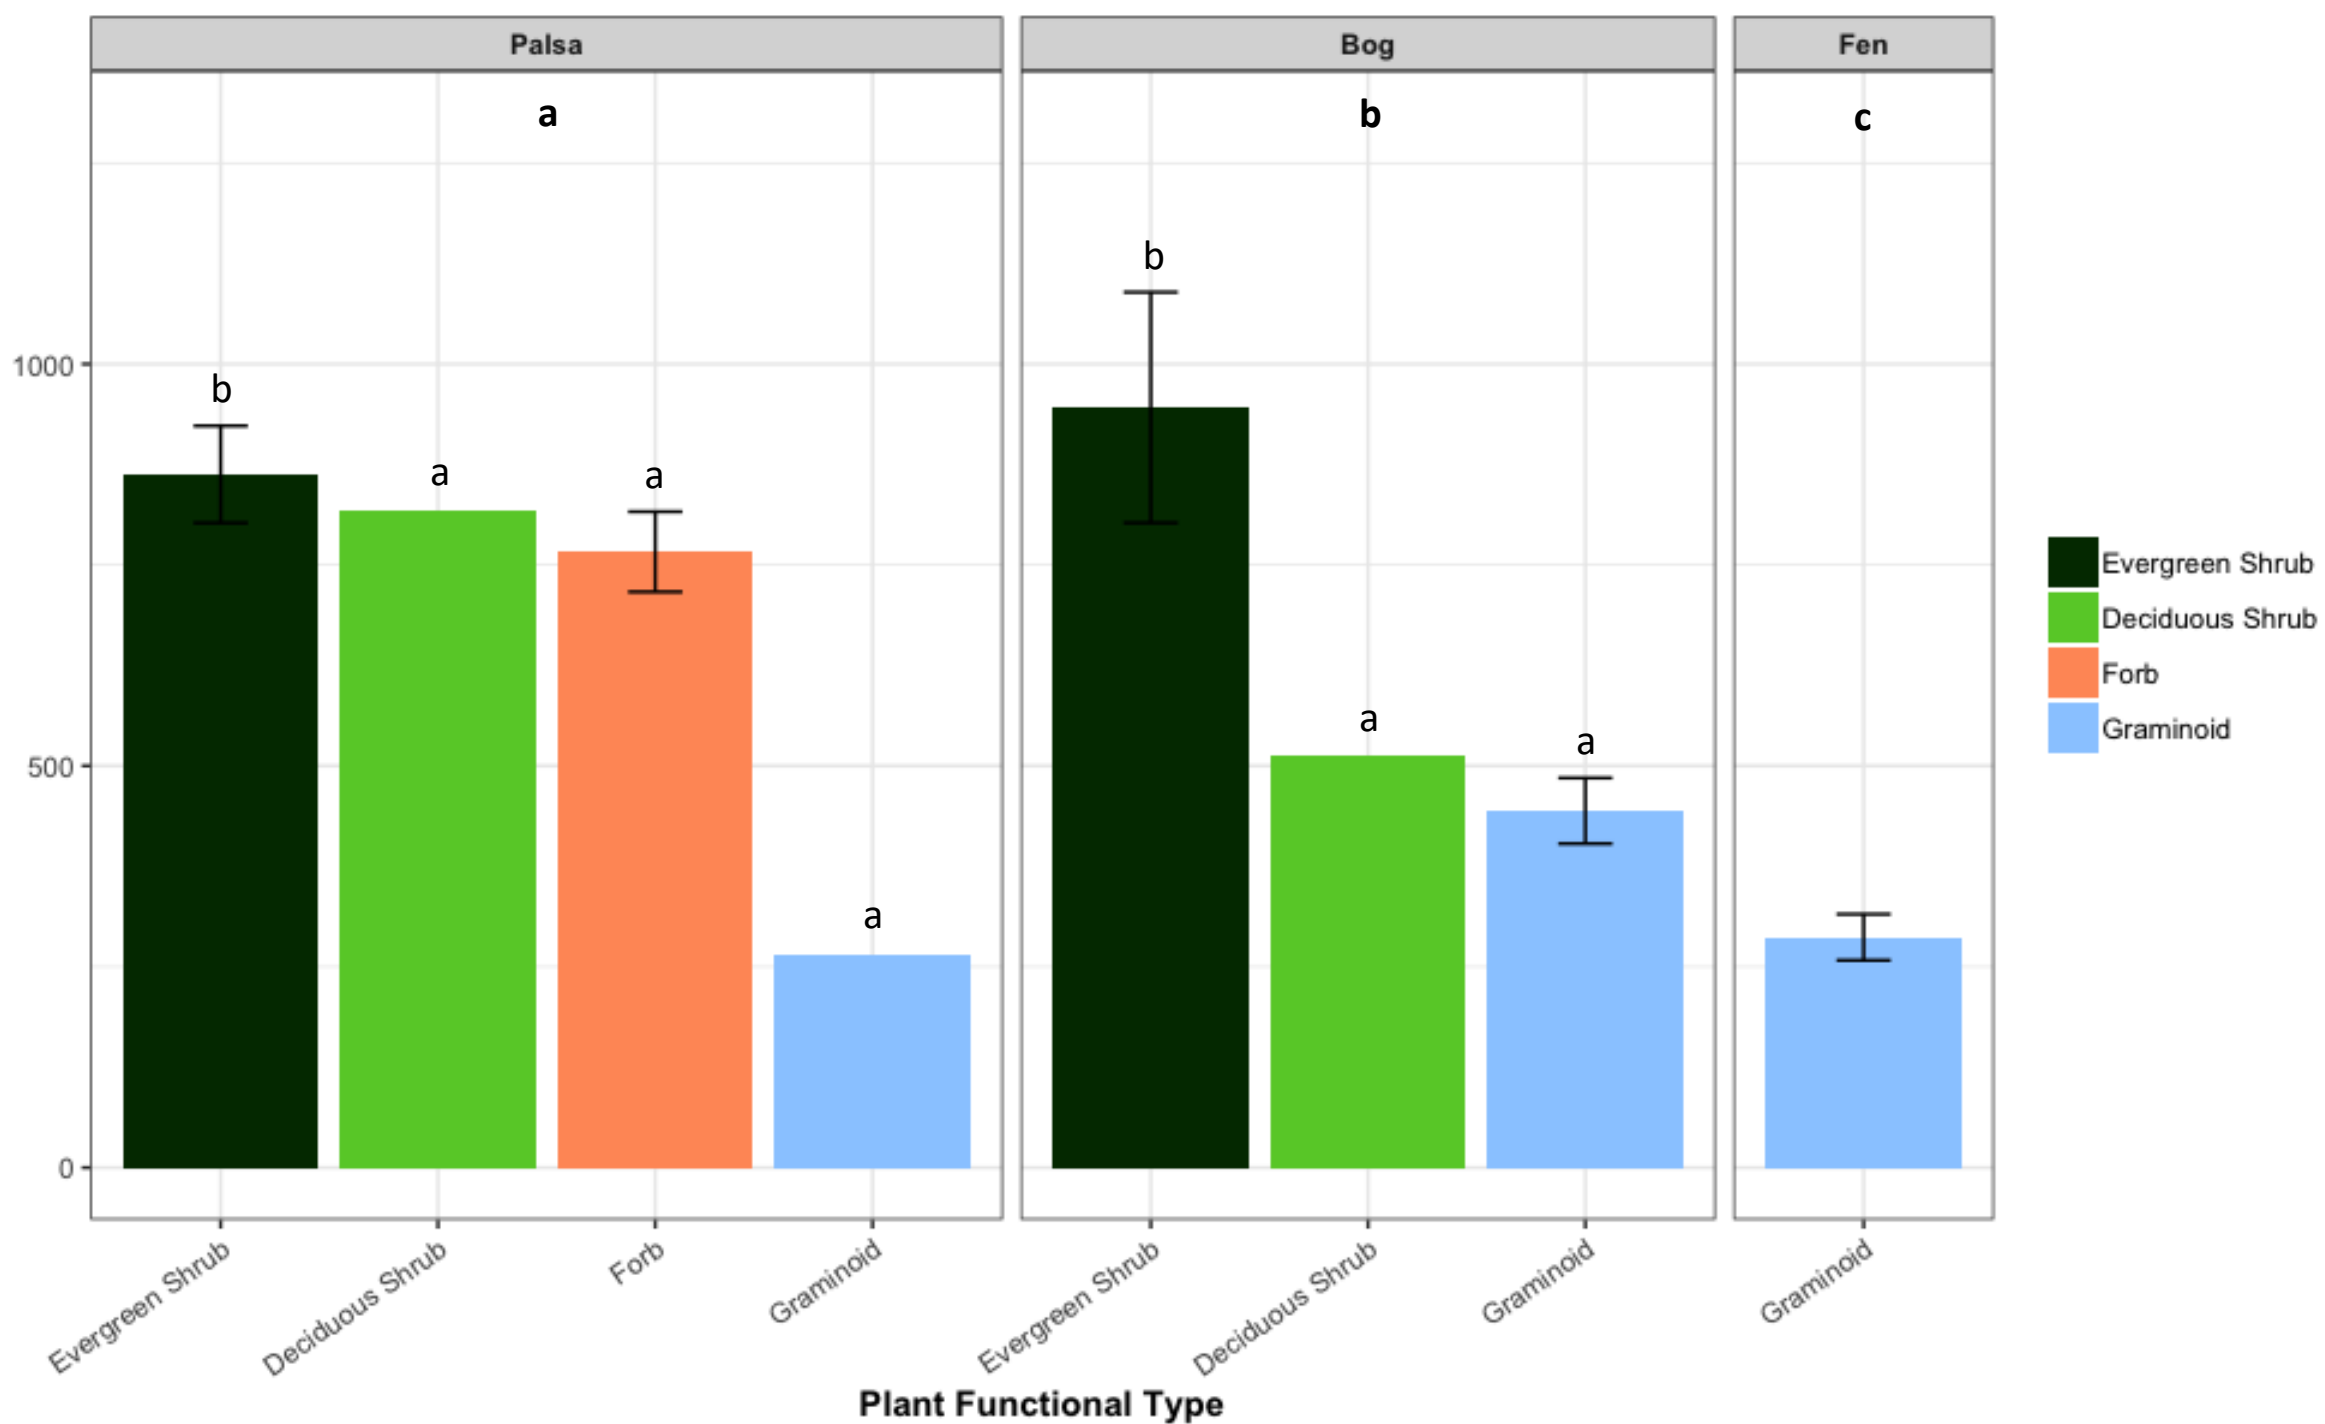

c)

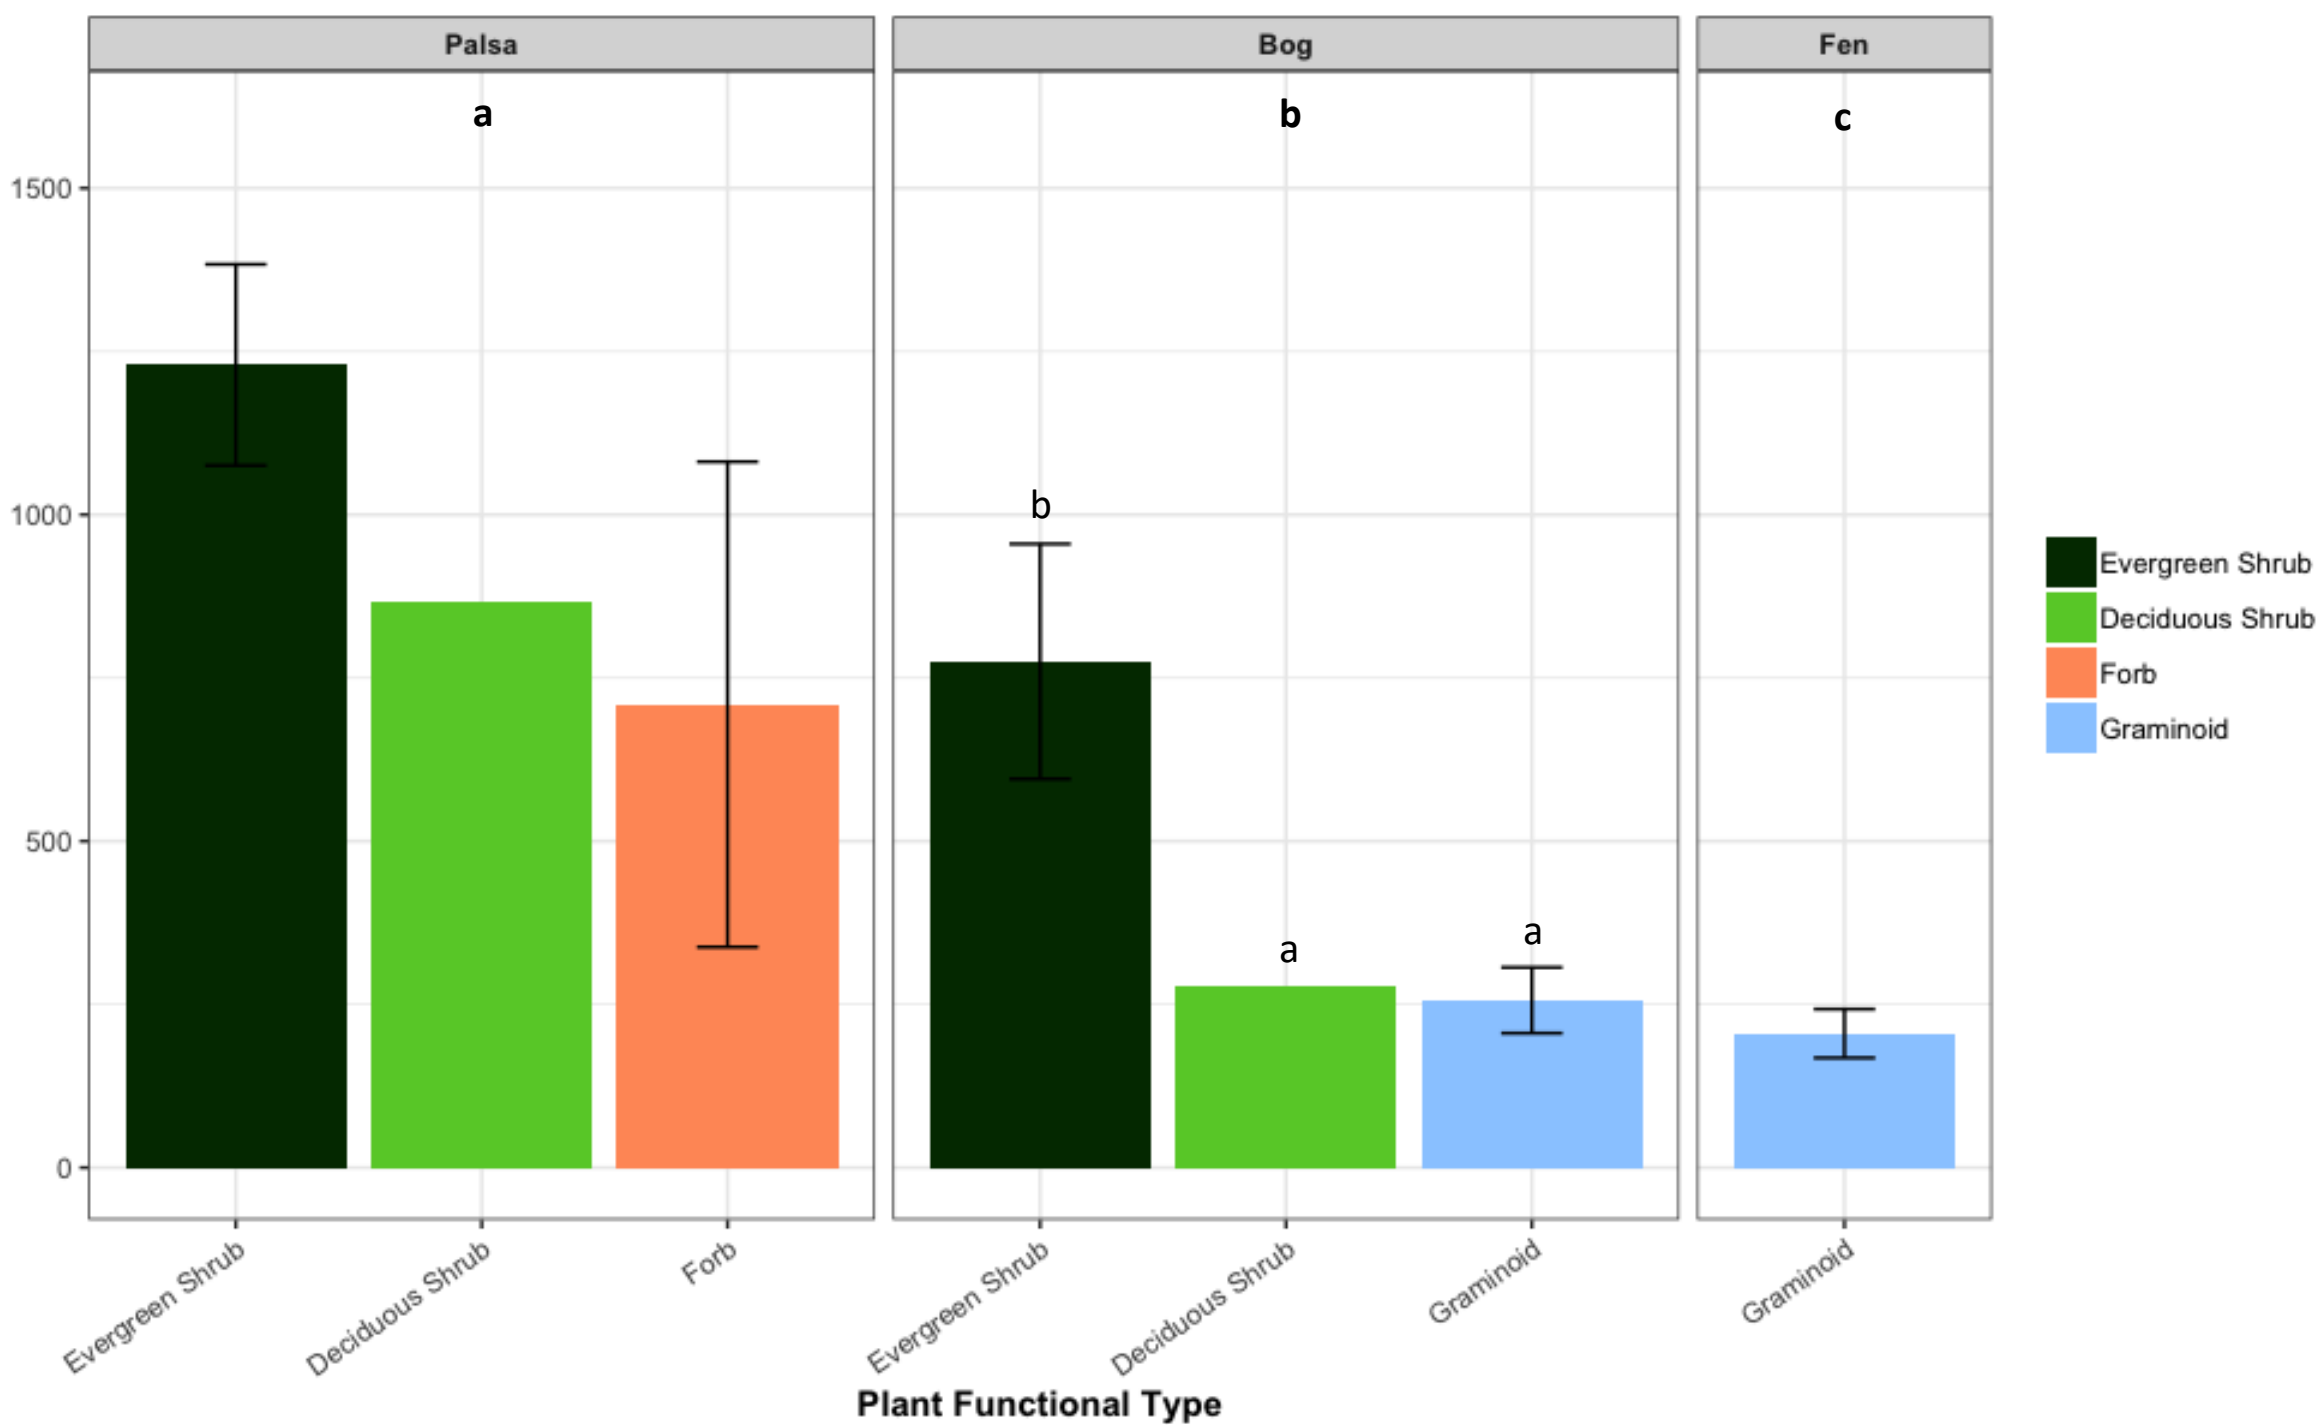

d)

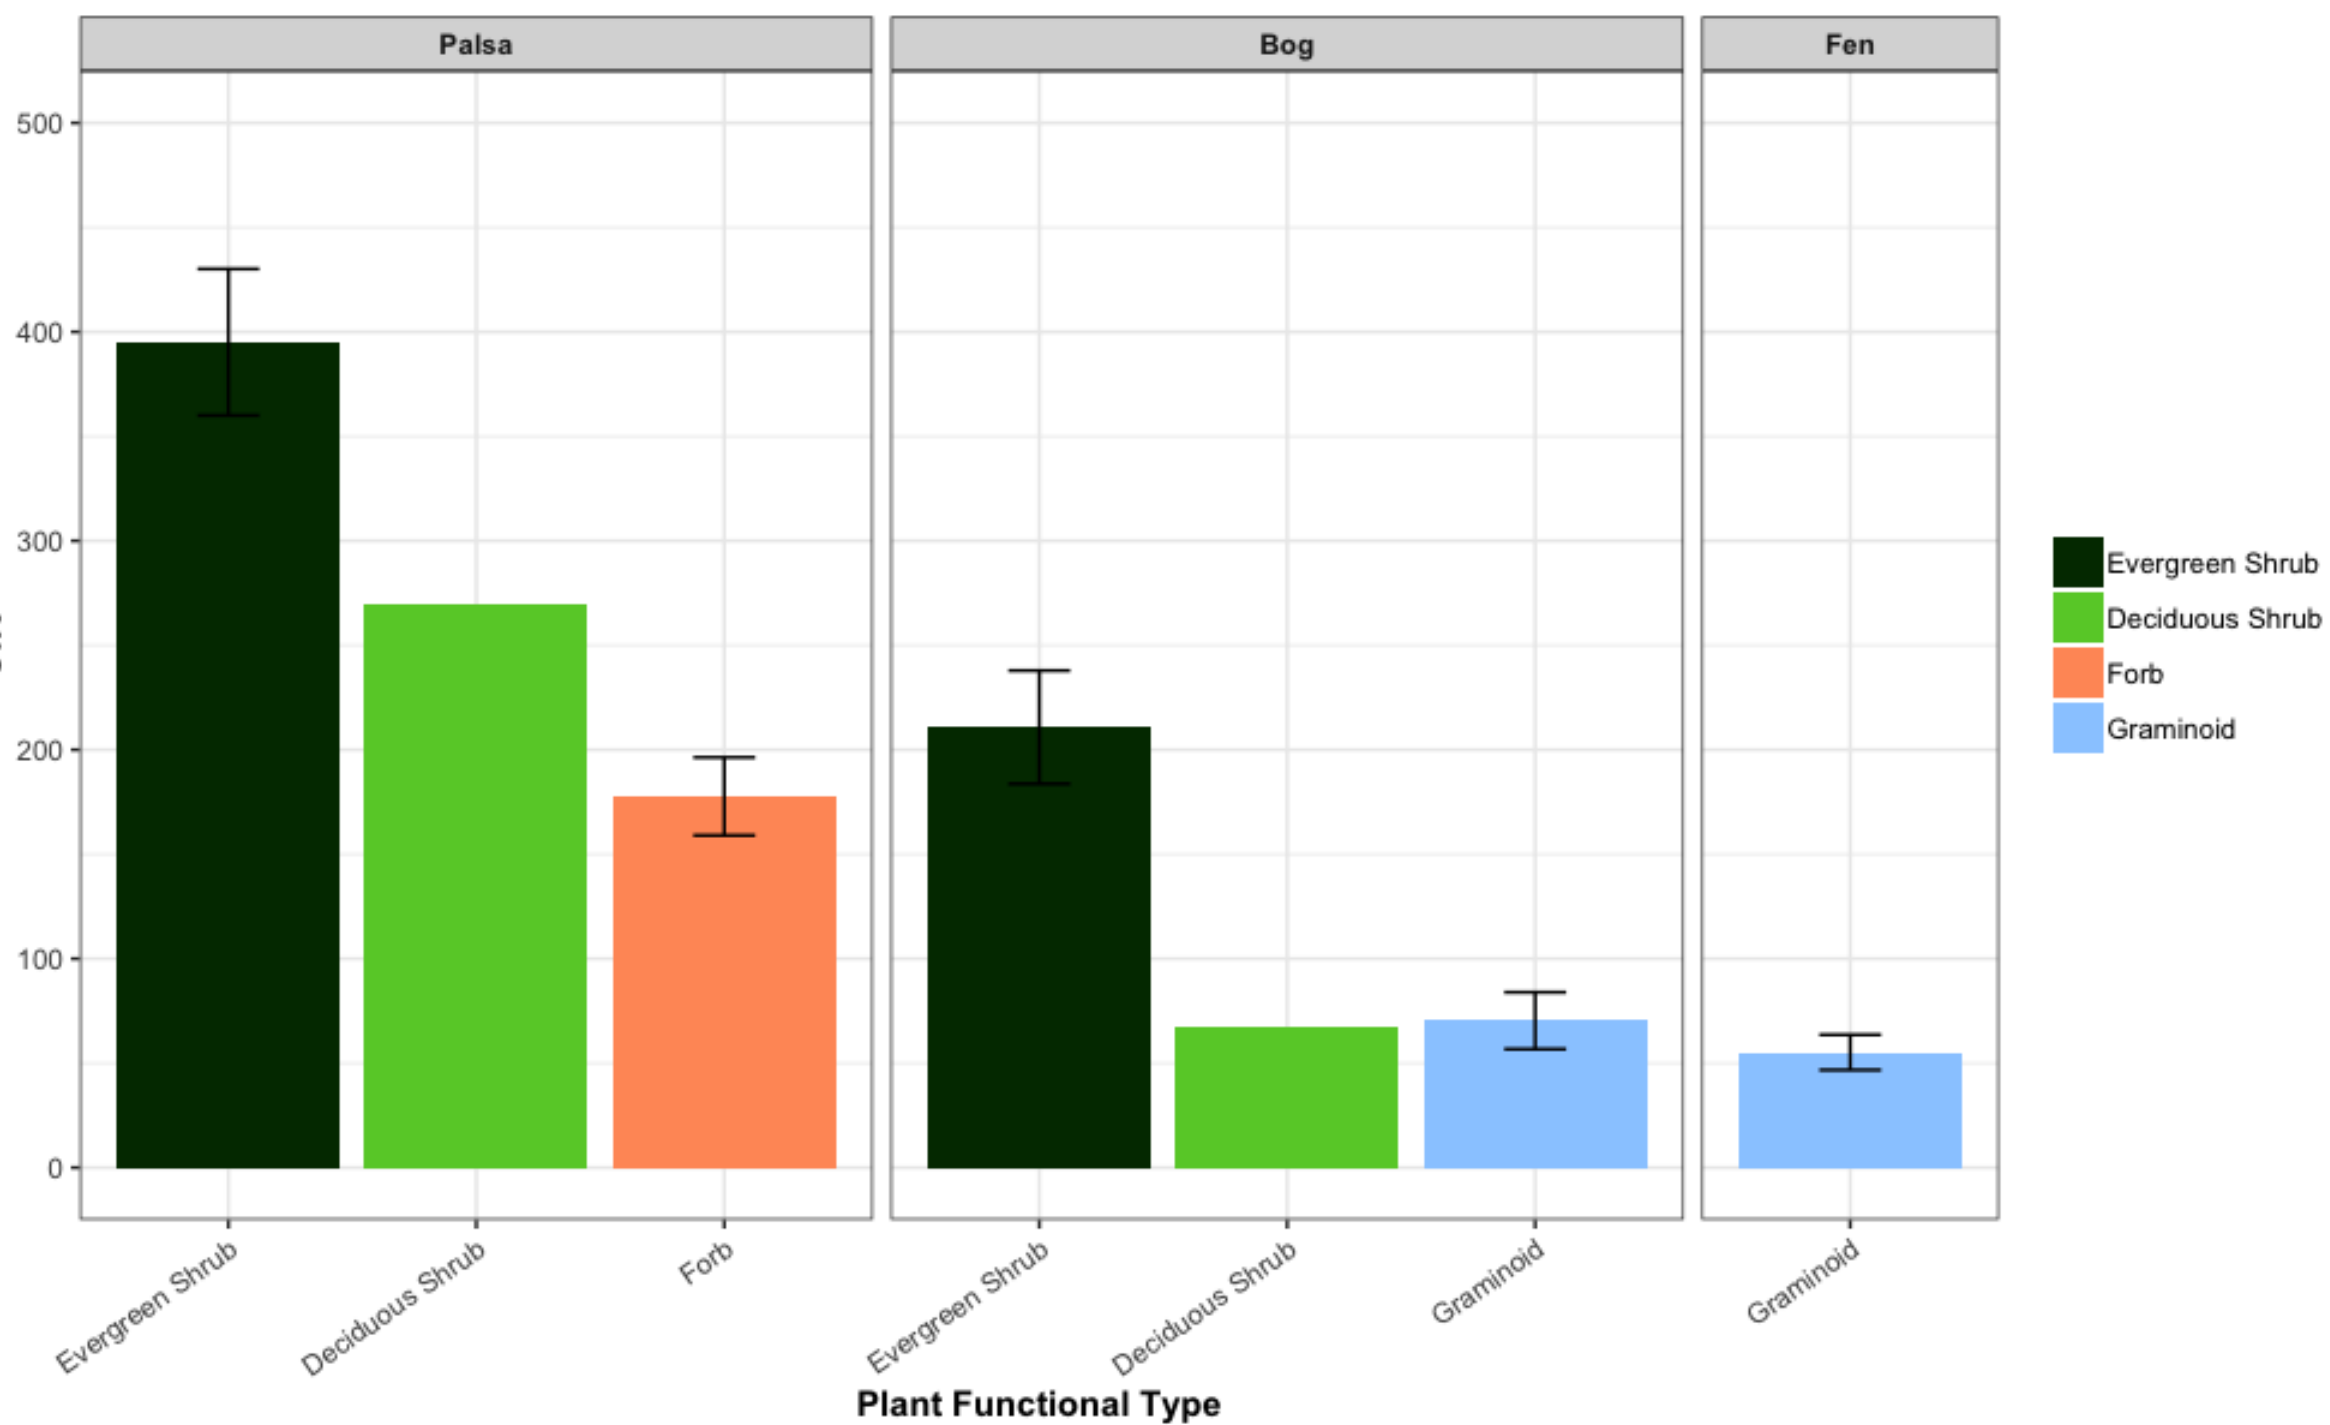

# Figure S7: *E. angustifolium* stoichiometry

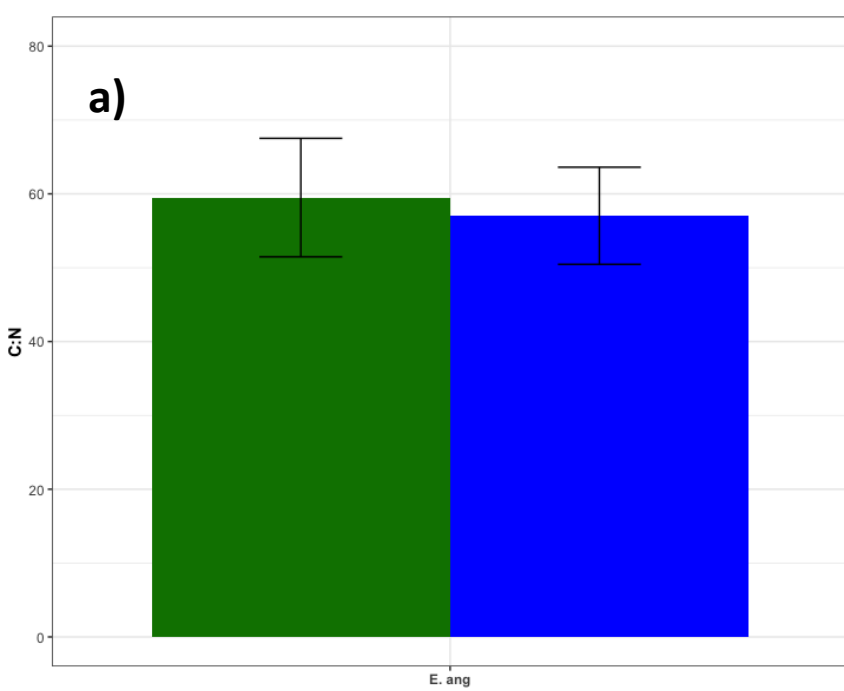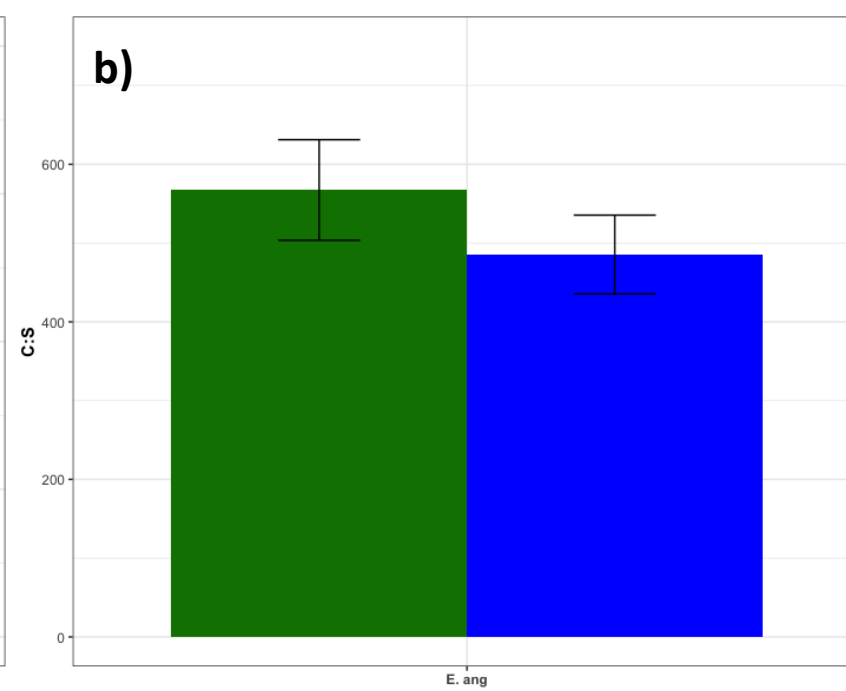

Bog  
Fen

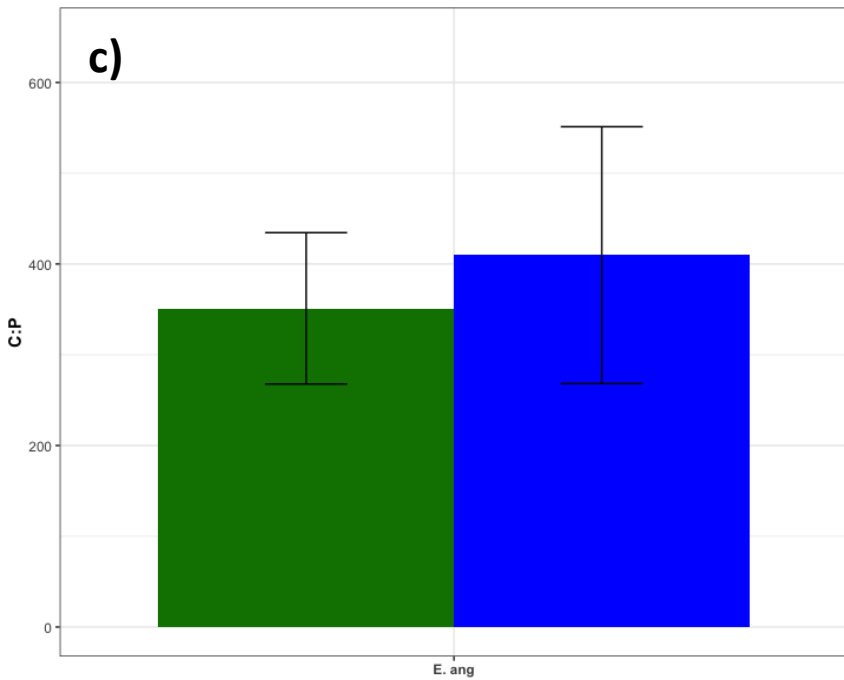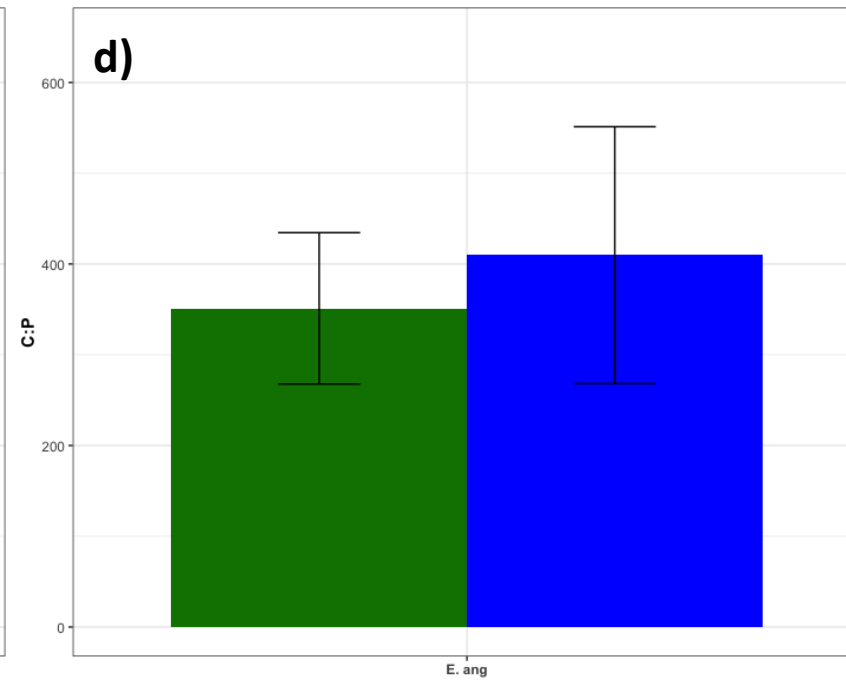

Bog  
Fen



# Figure S8: *E. vaginatum* stoichiometry

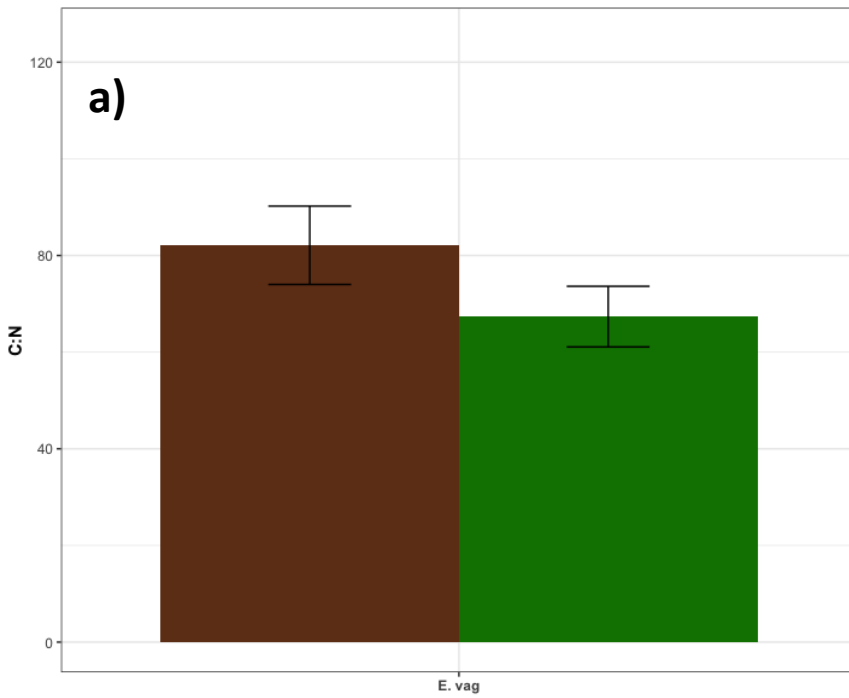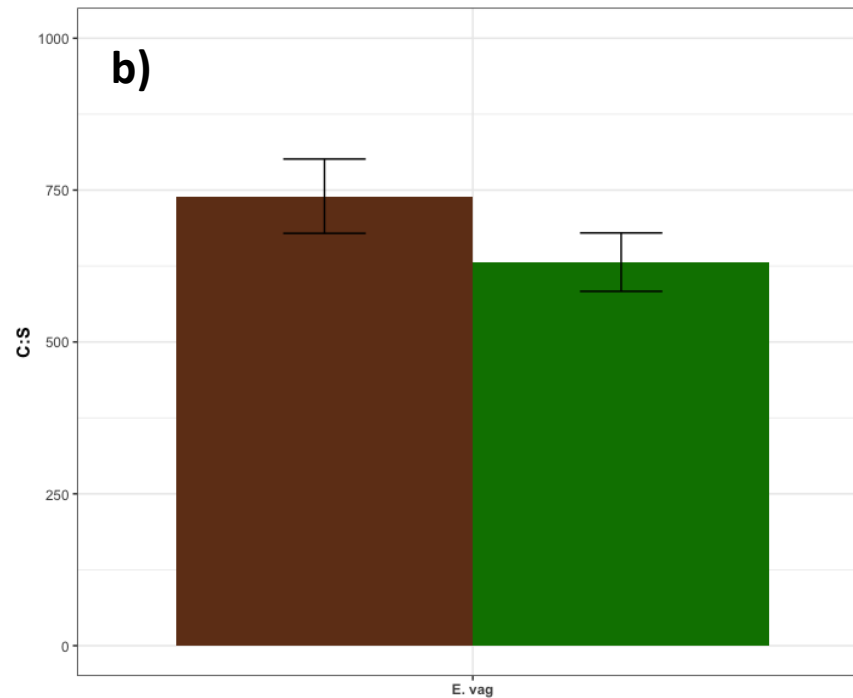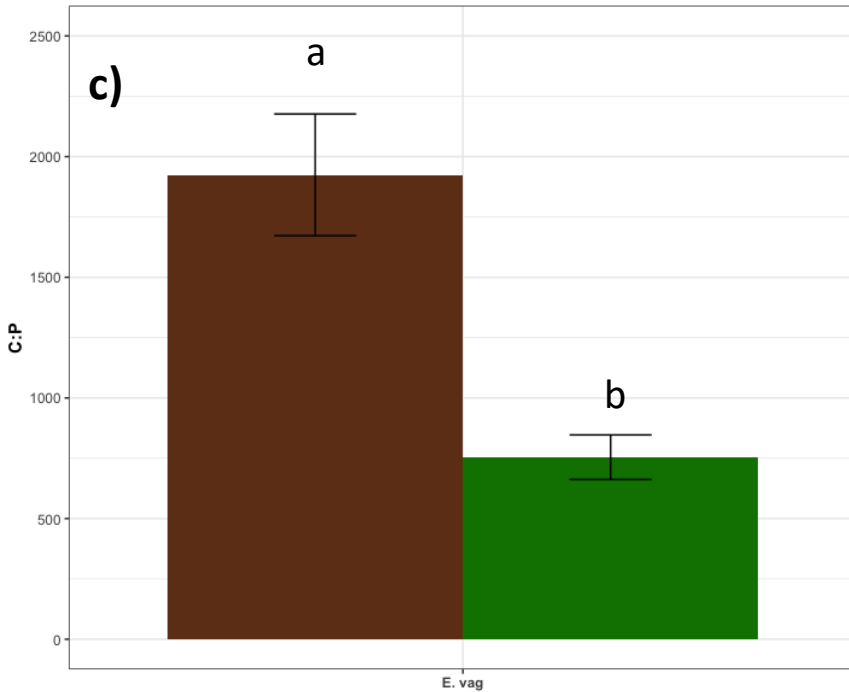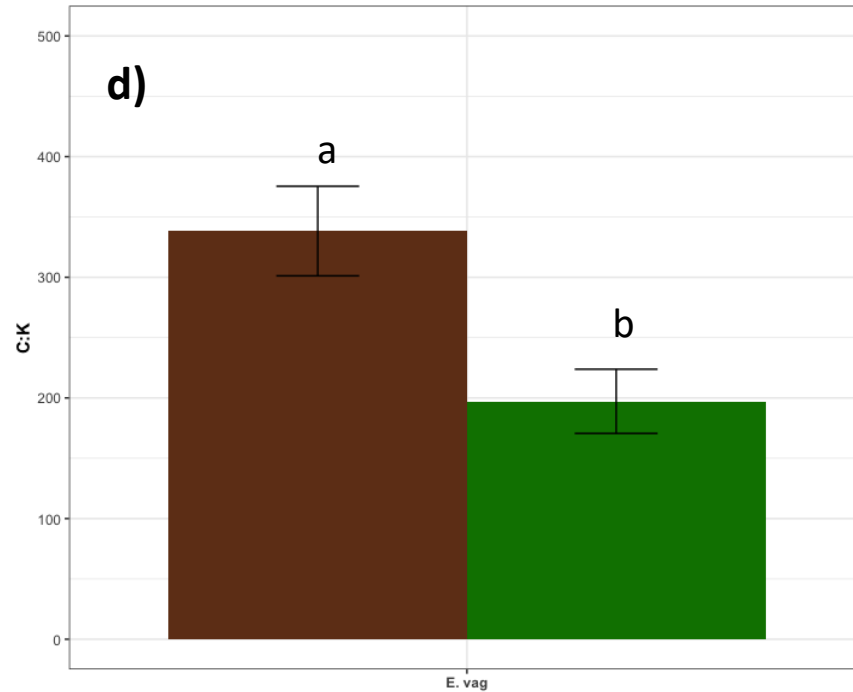

Palsa  
Bog

Palsa  
Bog

# Figure S9: *E. vaginatum* vs *E. angustifolium* stoichiometry

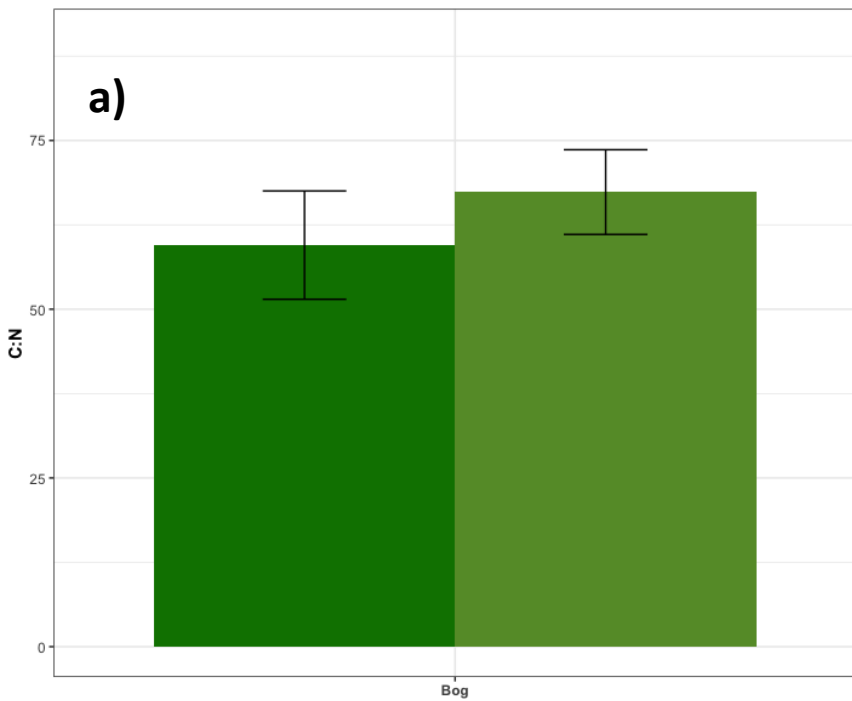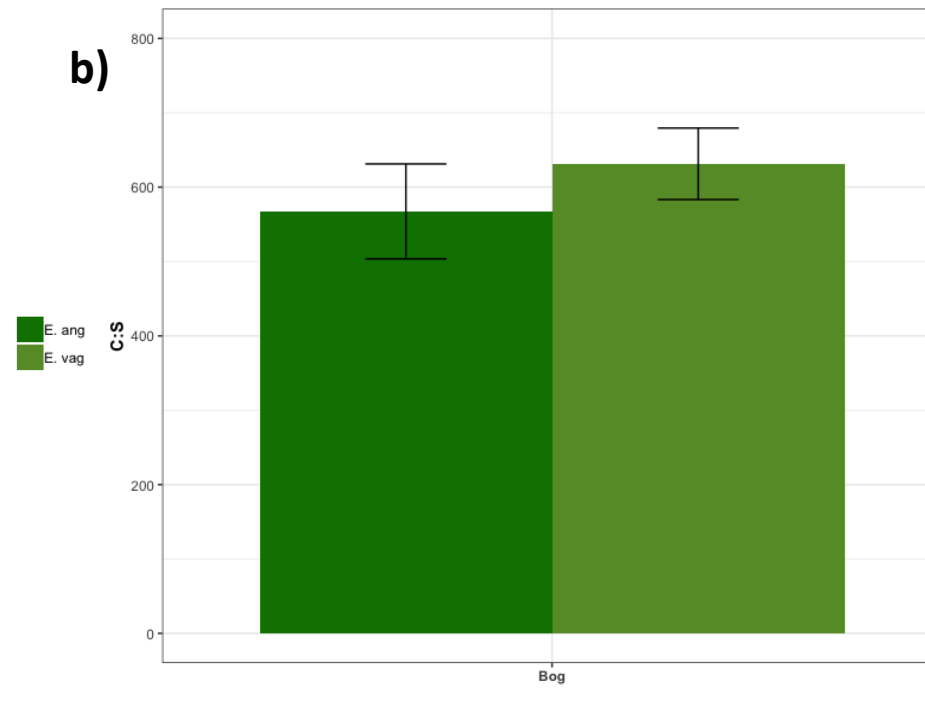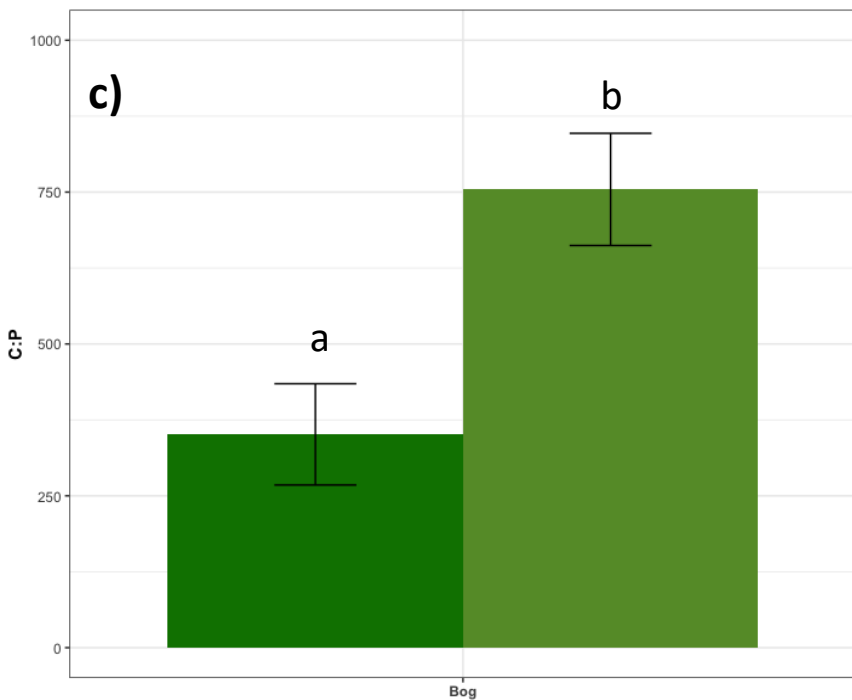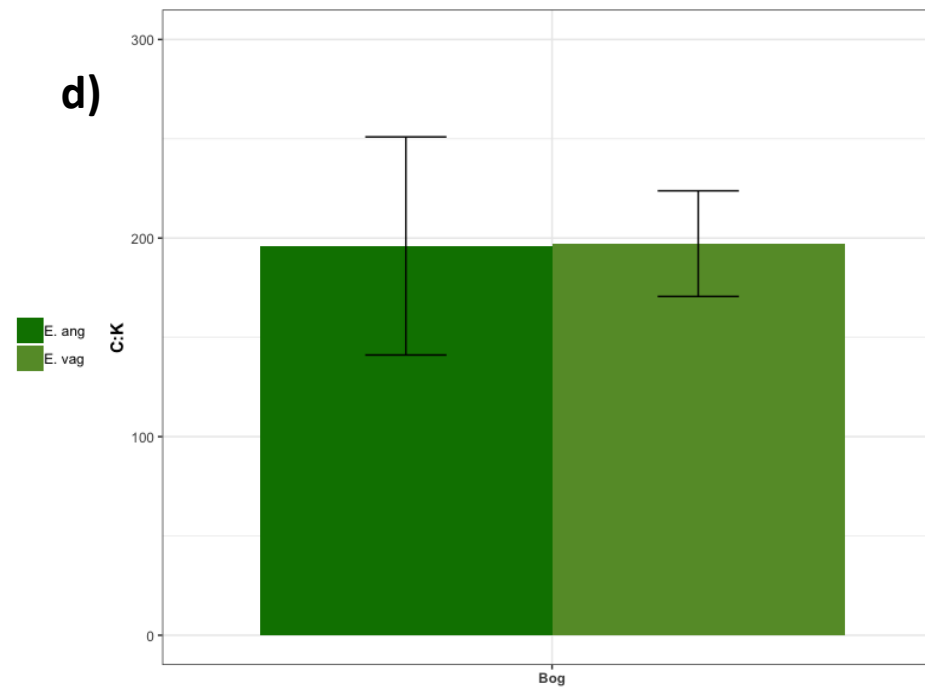

Figure S10: nutrient changes over growing season

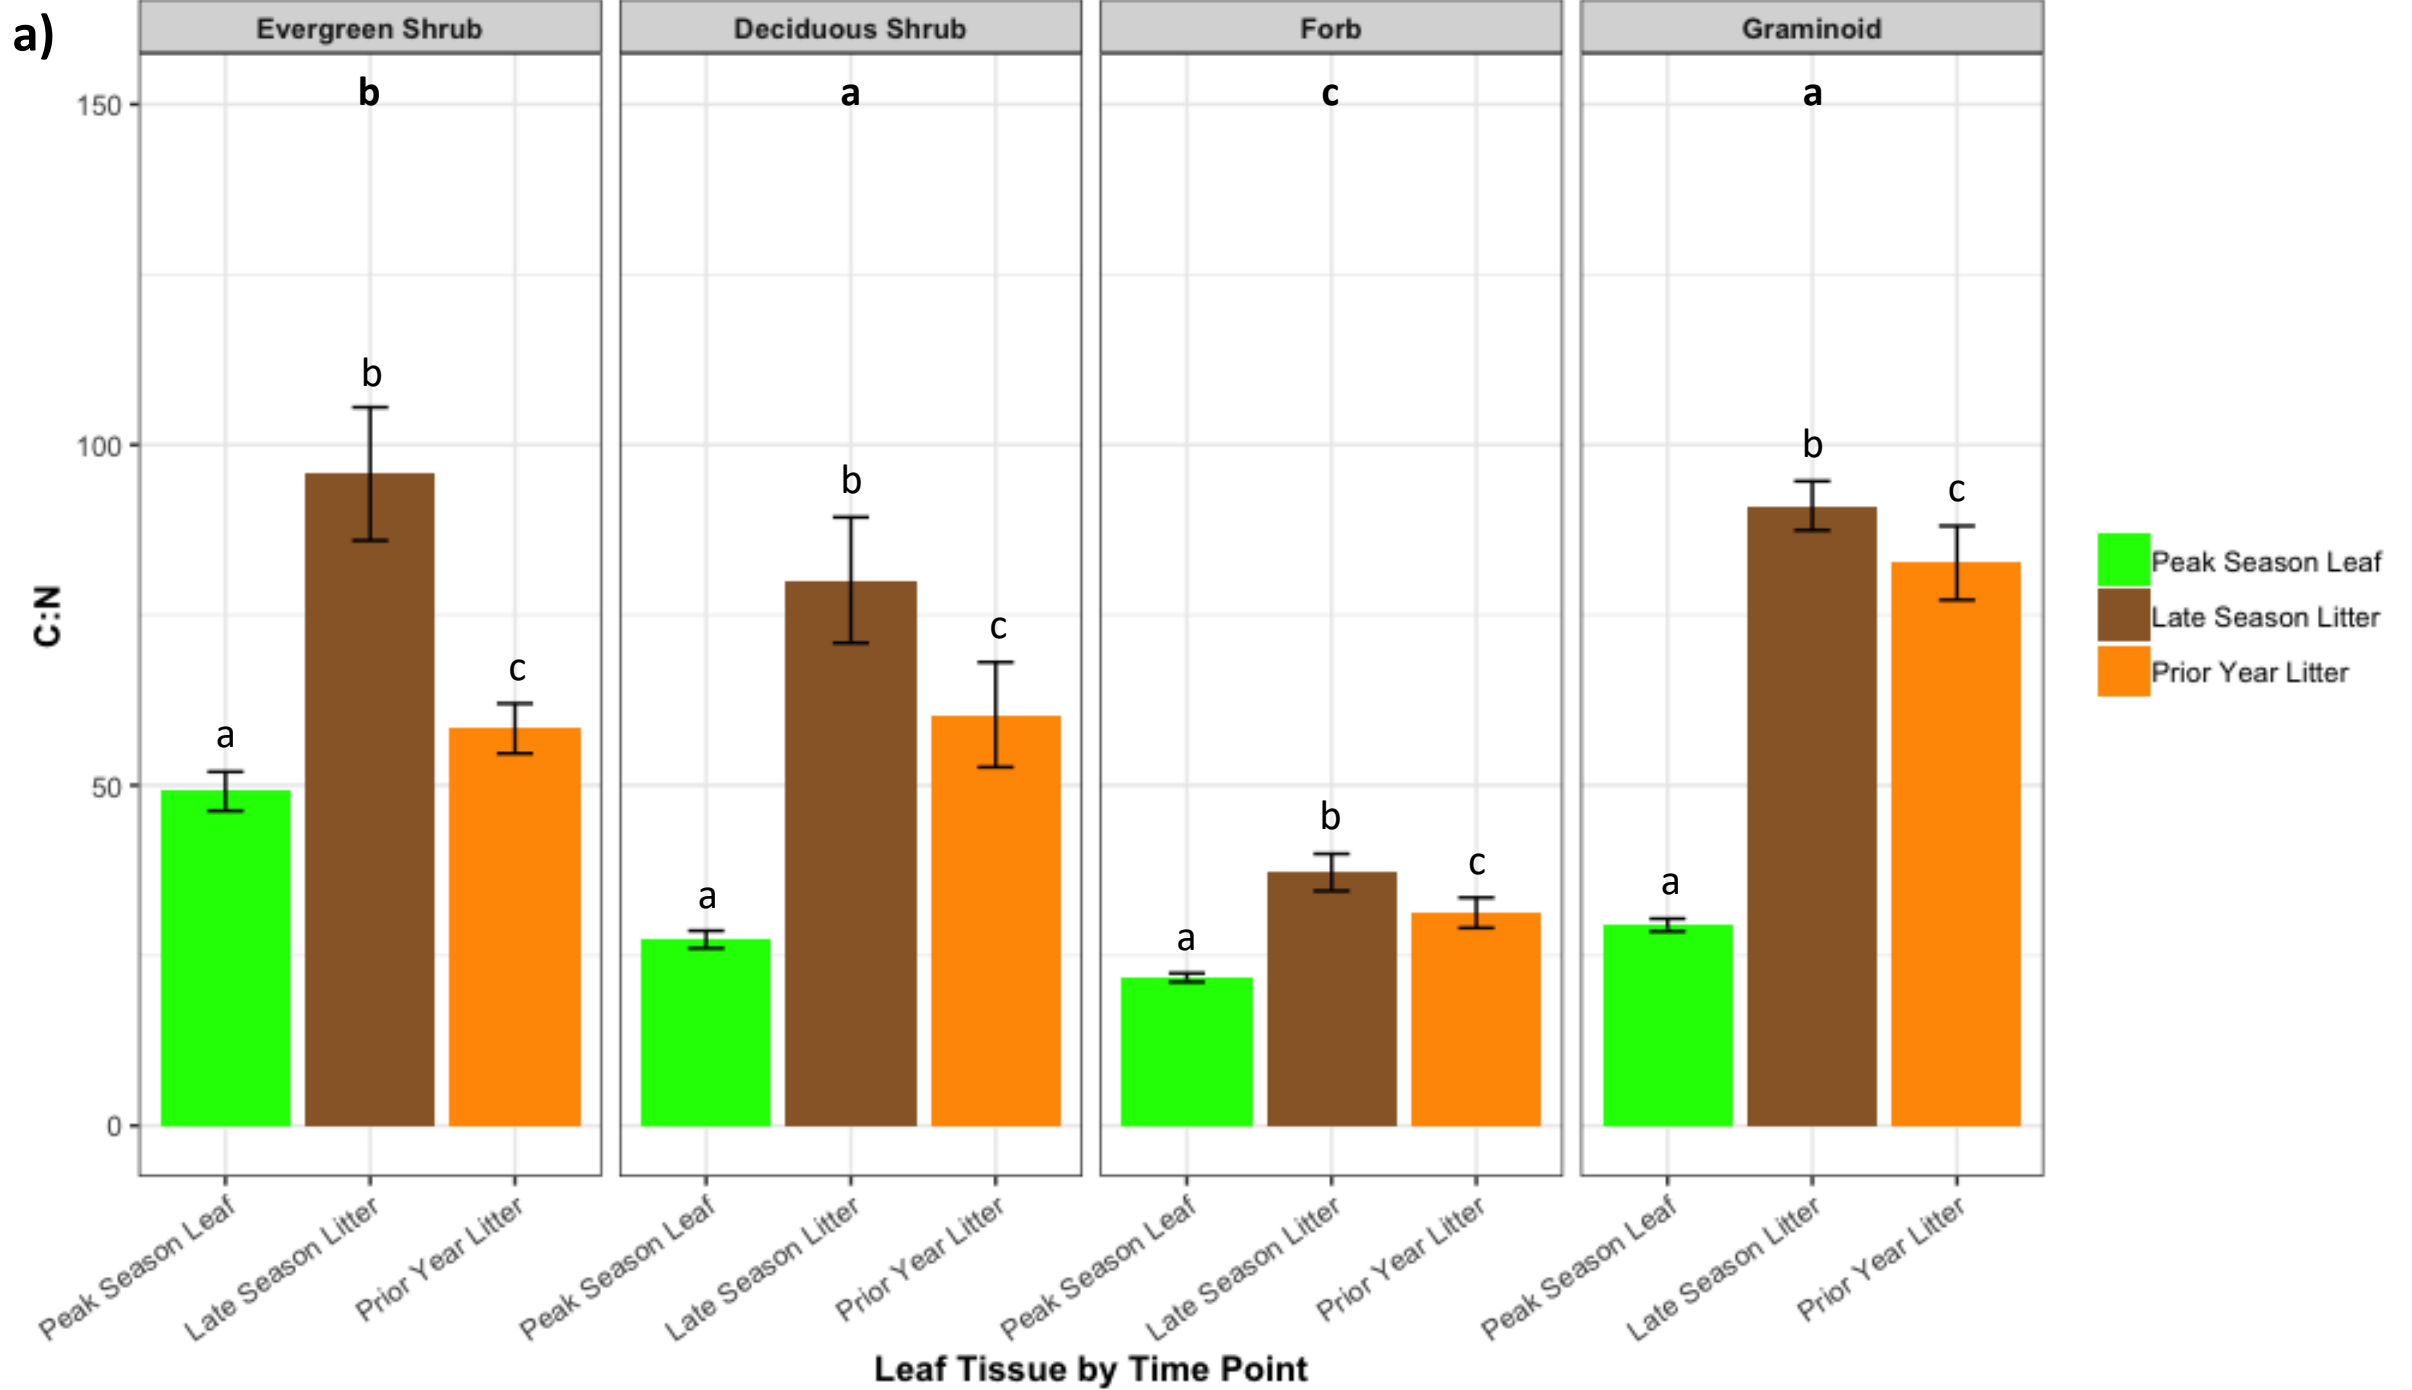

**b)**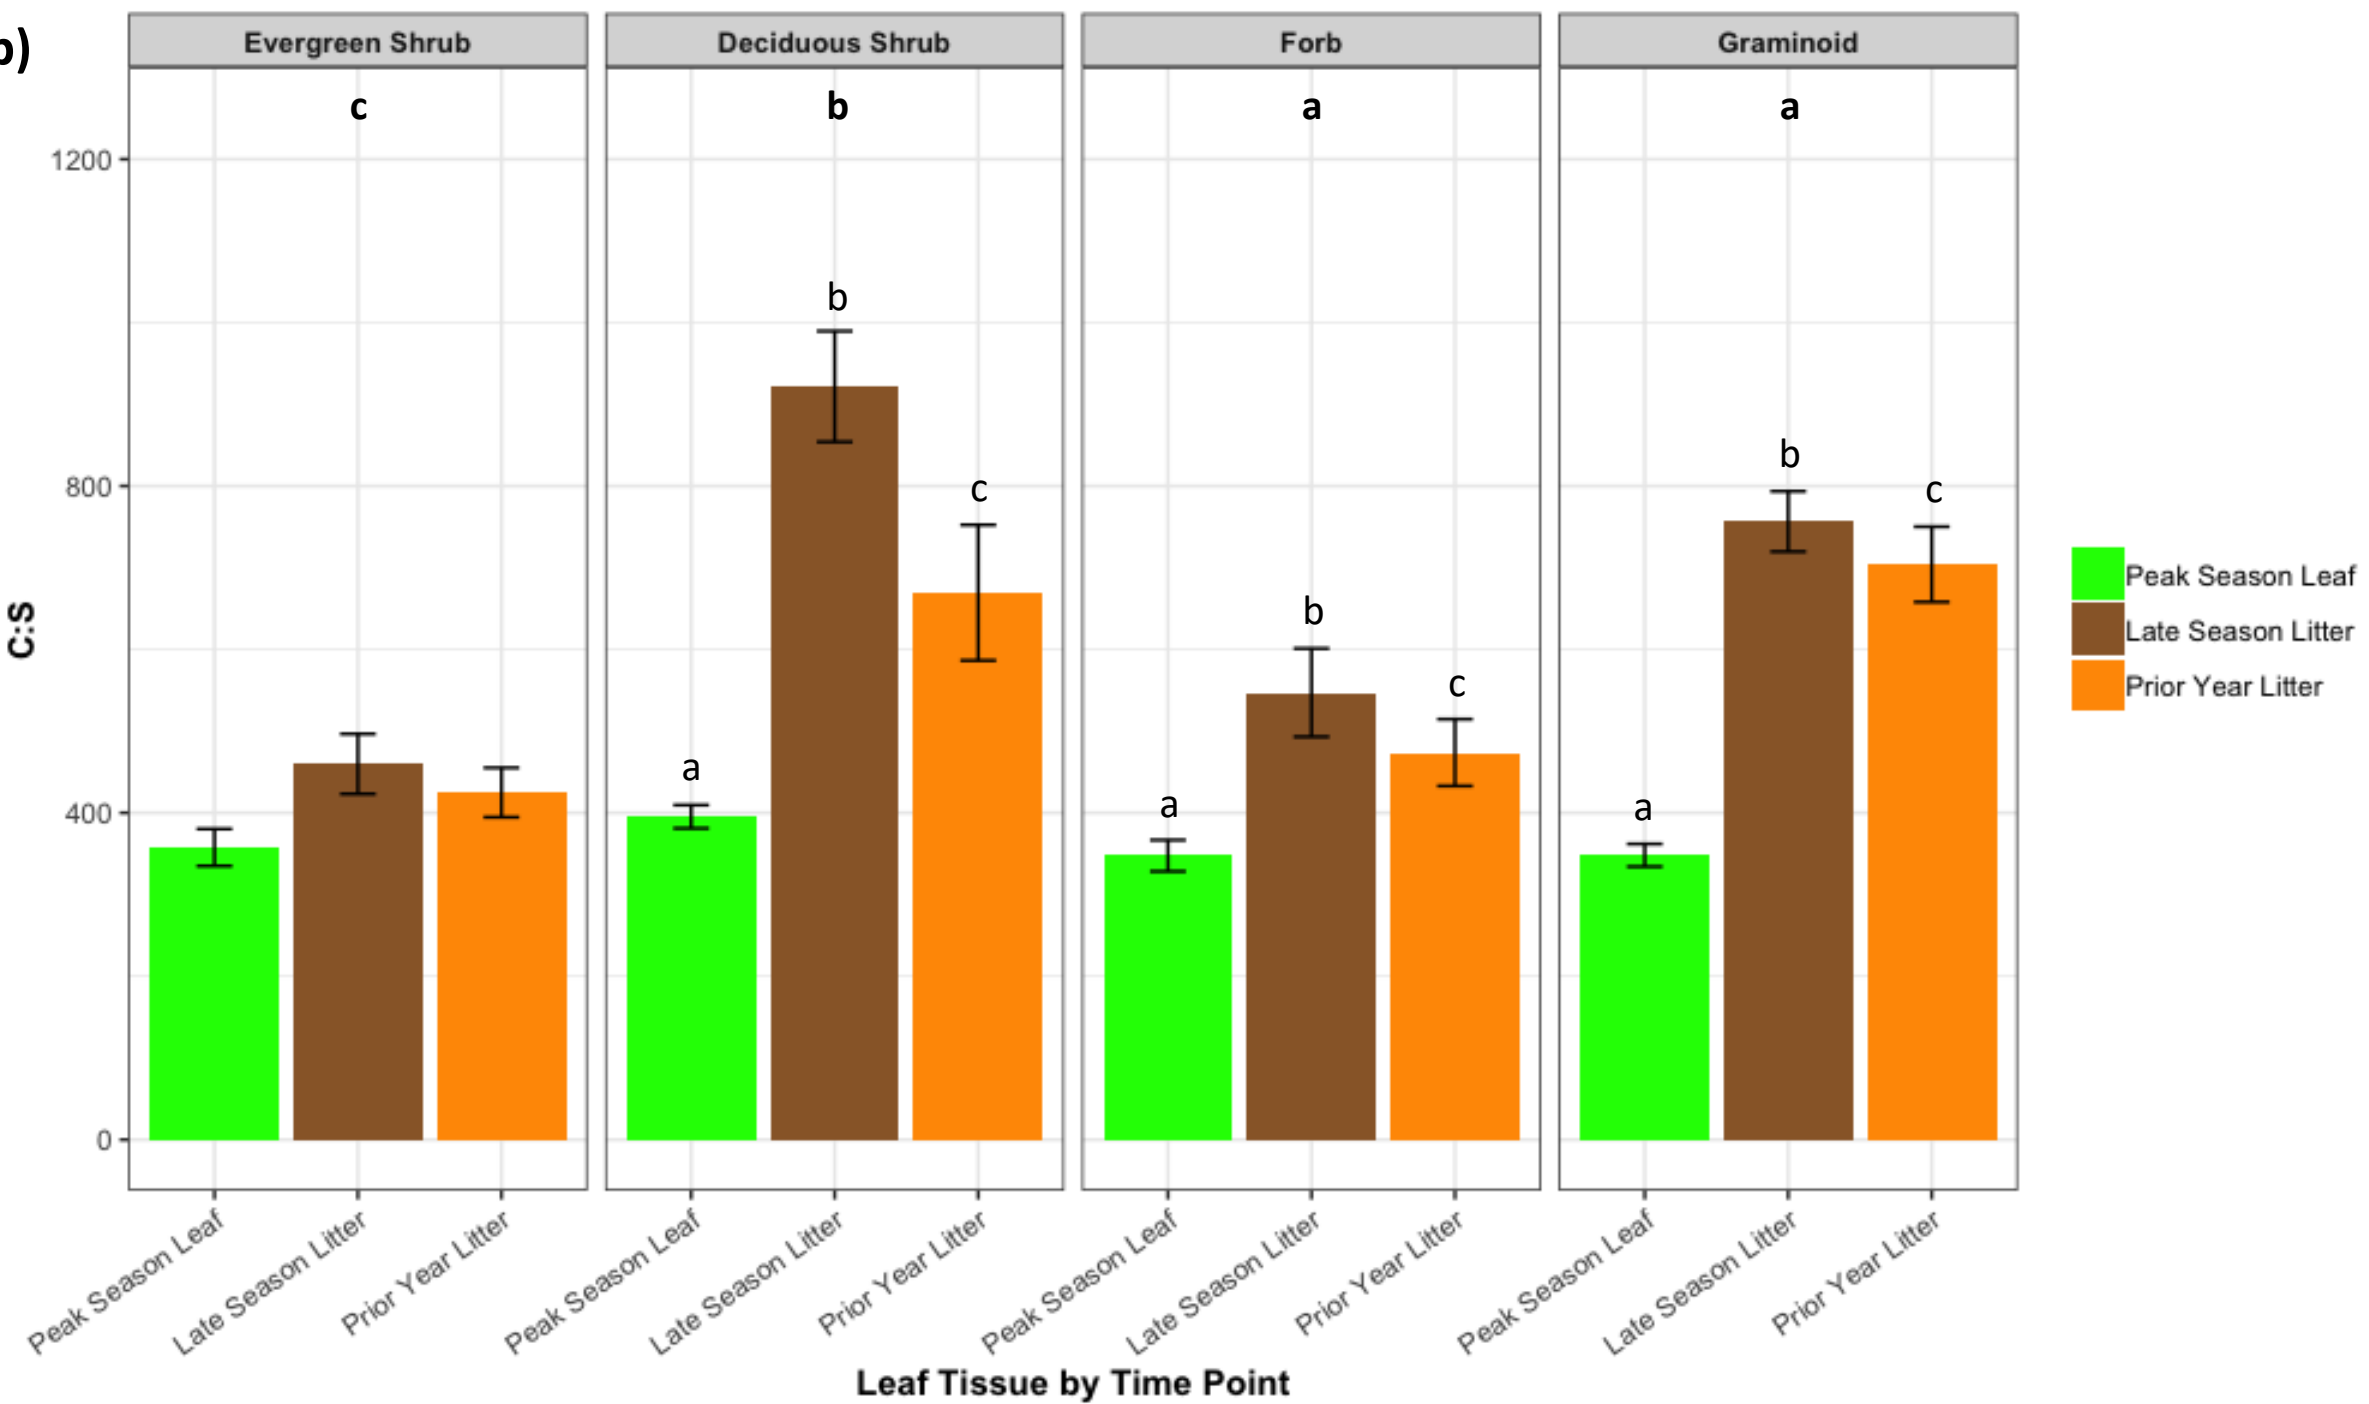

c)

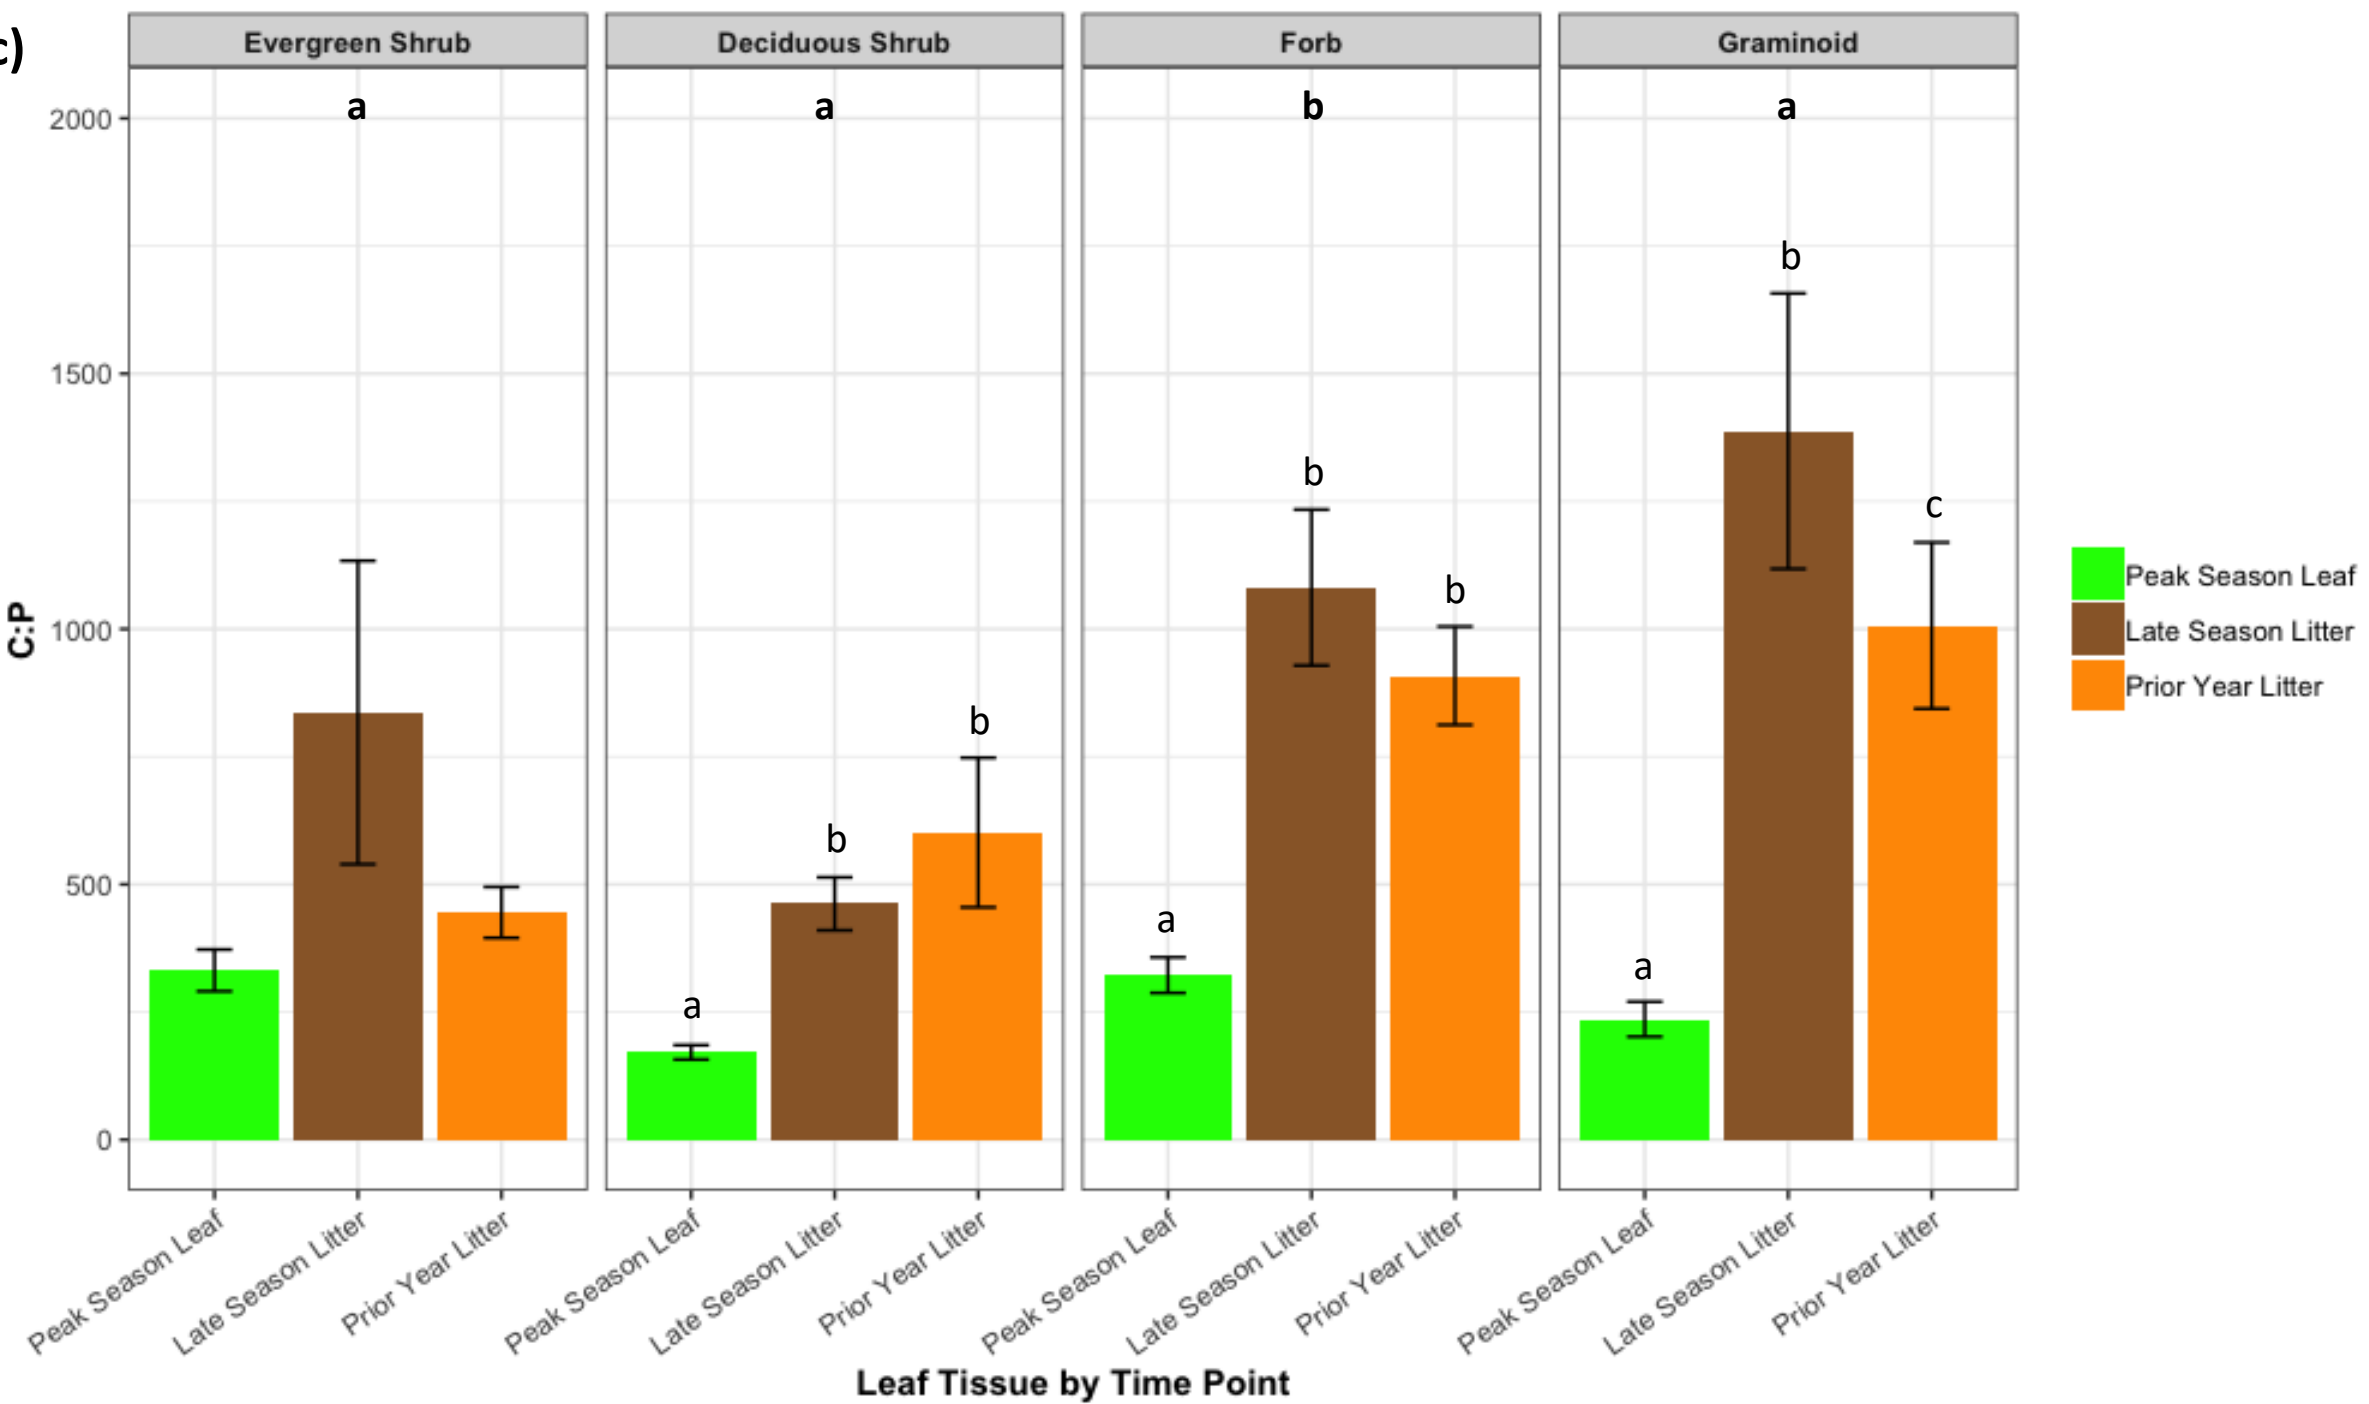

d)

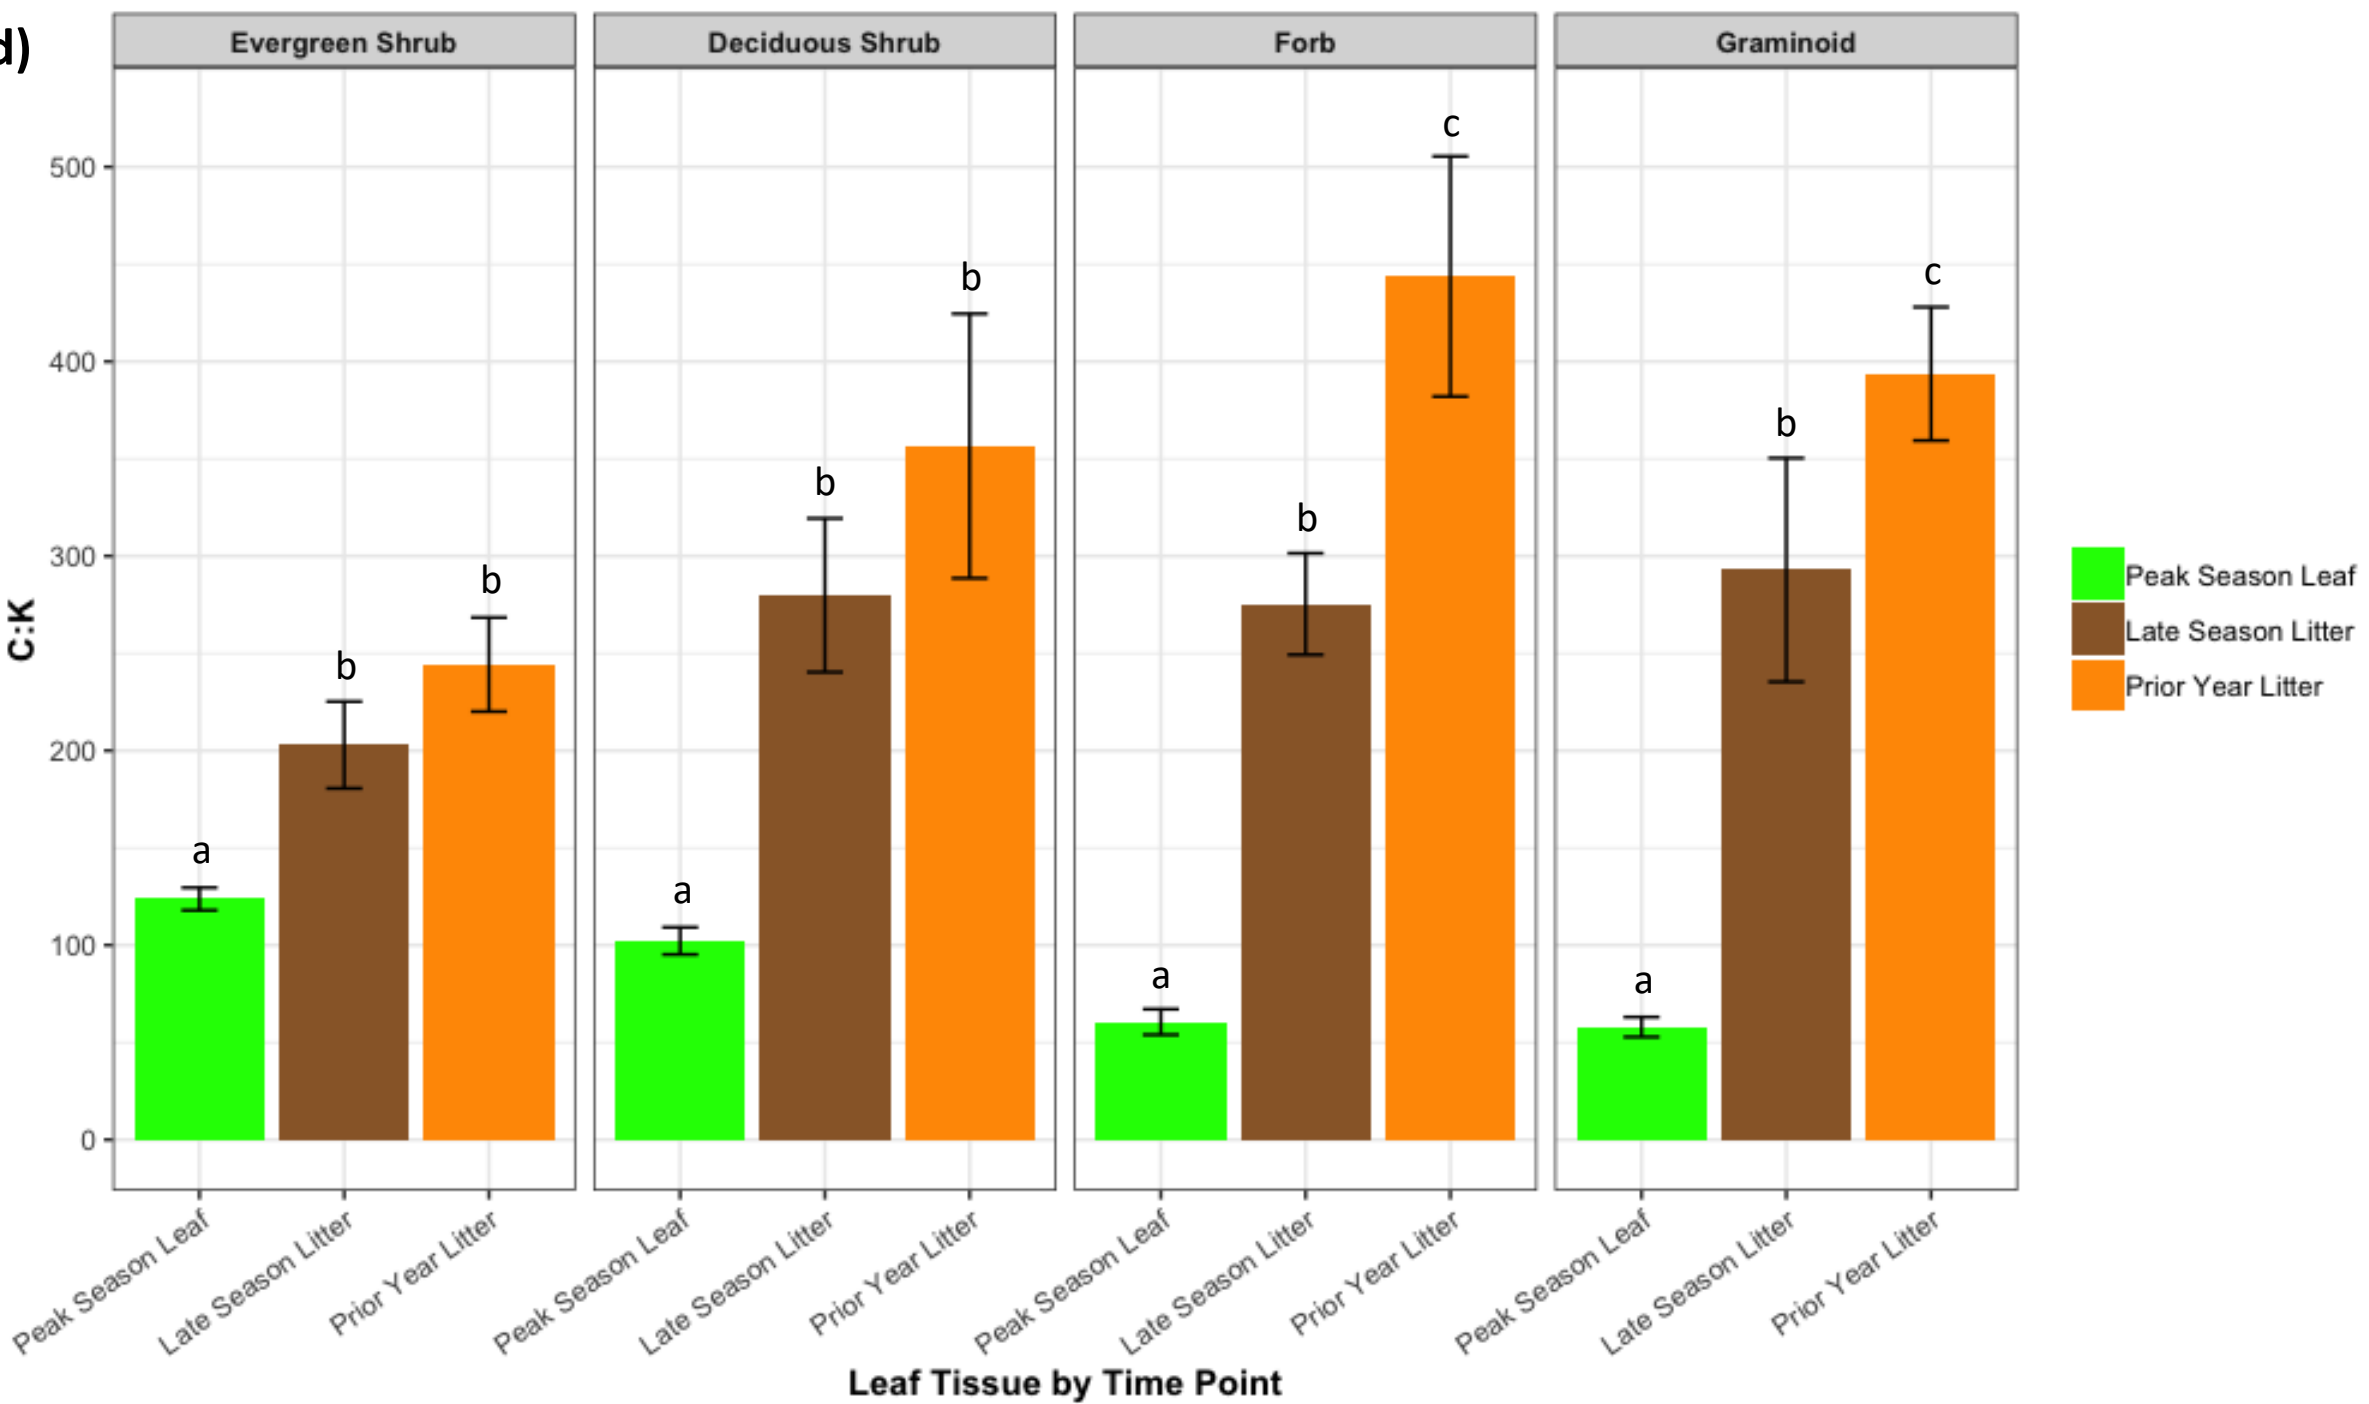

# Figure S11a

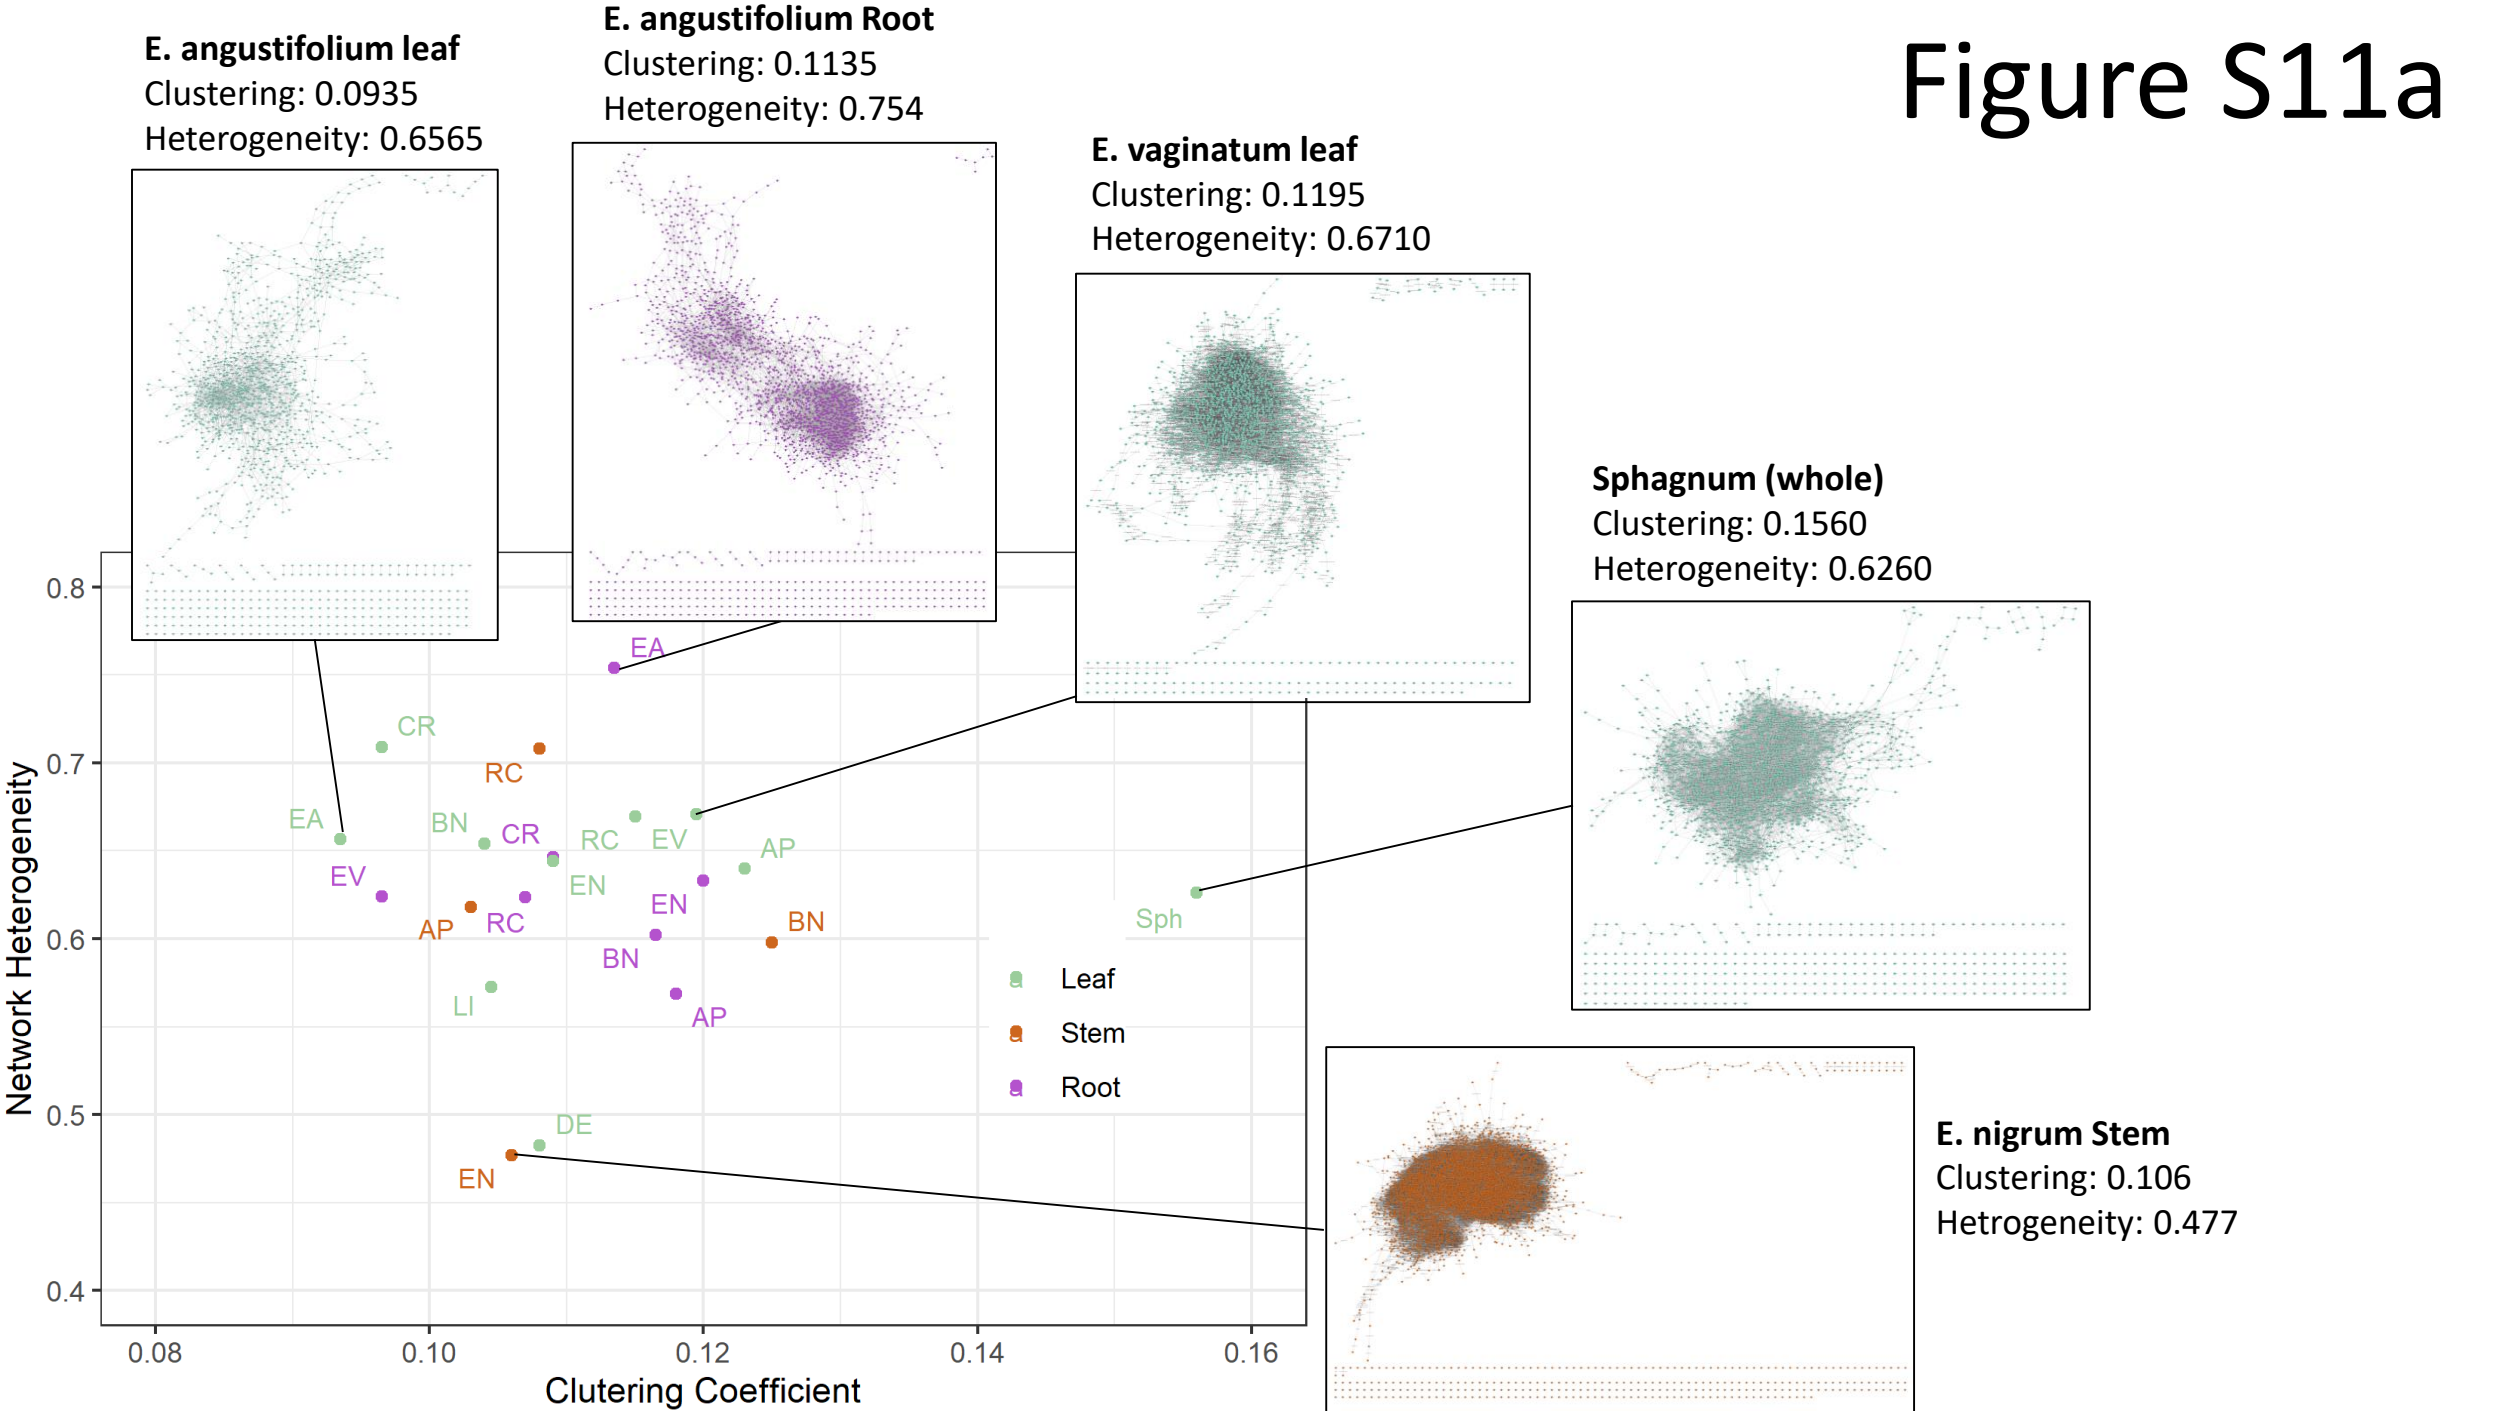



# Figure S11

B

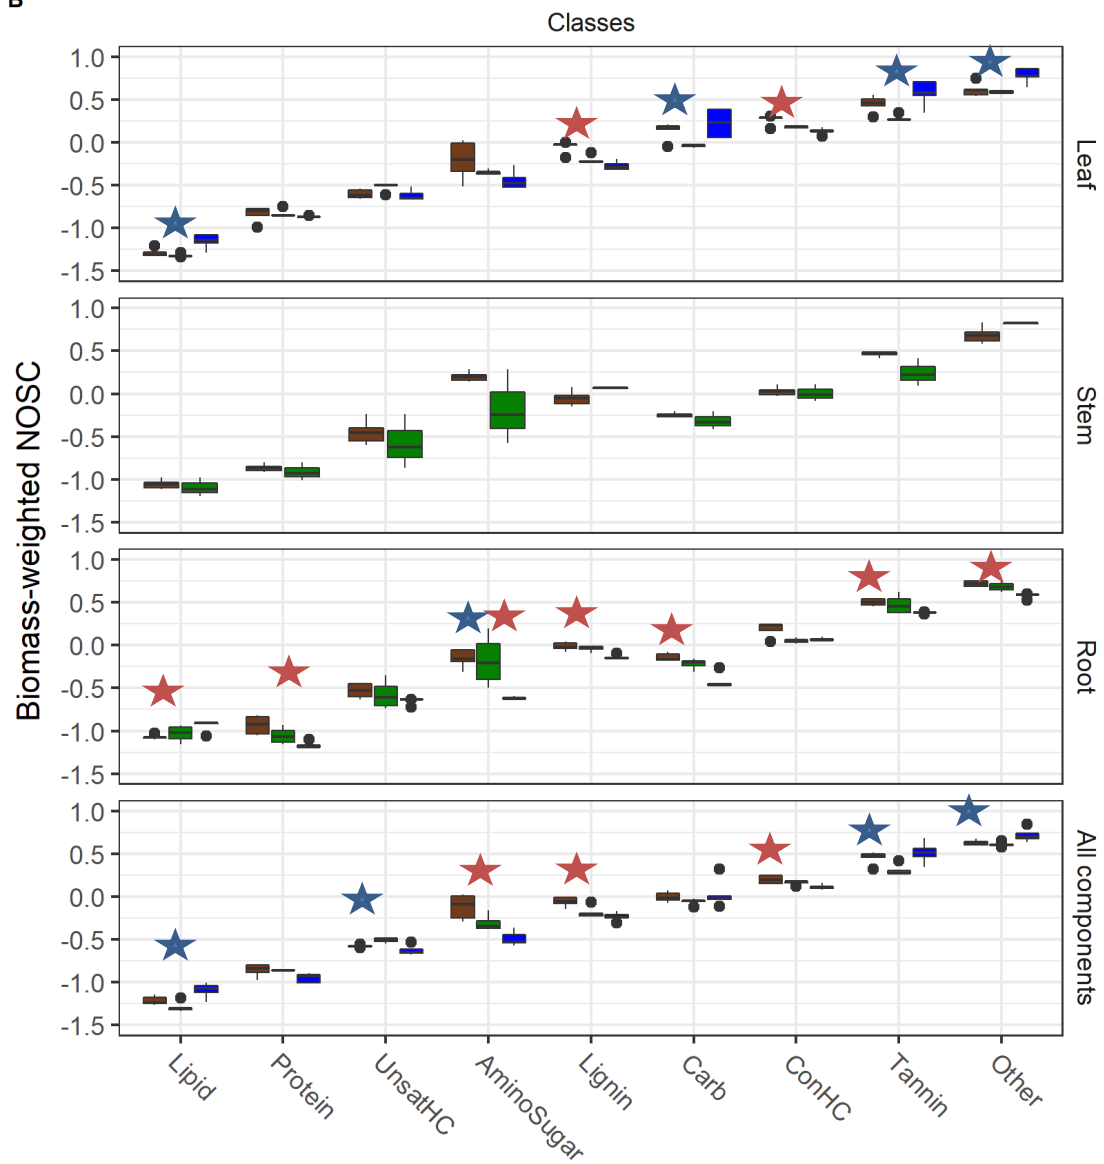

C

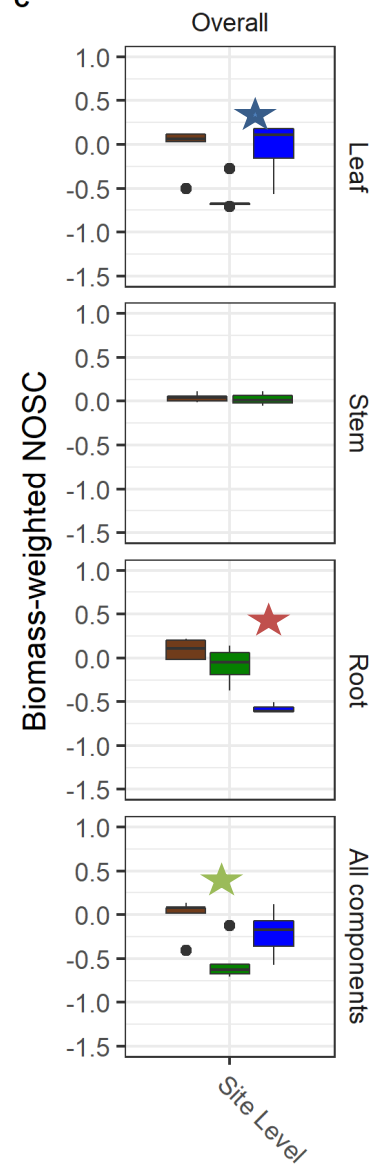

D

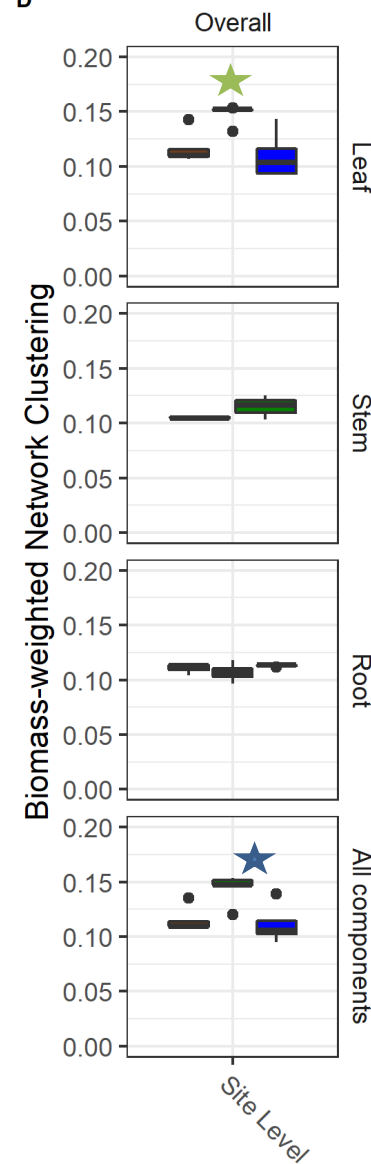

E

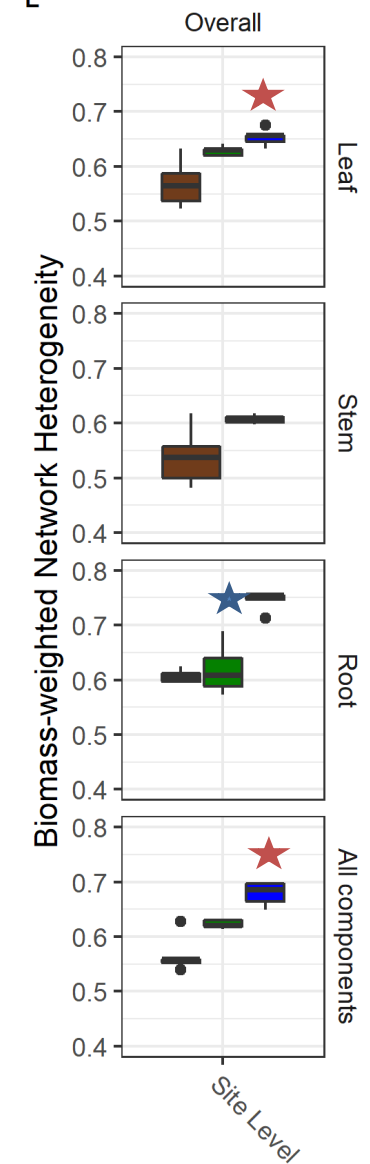

Significant at  
BH Q=0.05

★ Bog-Fen  
★ Palsa-Fen  
★ Palsa-Bog

■ Palsa  
■ Bog  
■ Fen

# Figure S12

Red dots indicate field measurements from this study. Box plots represent data found in the Fine Root Ecology Database

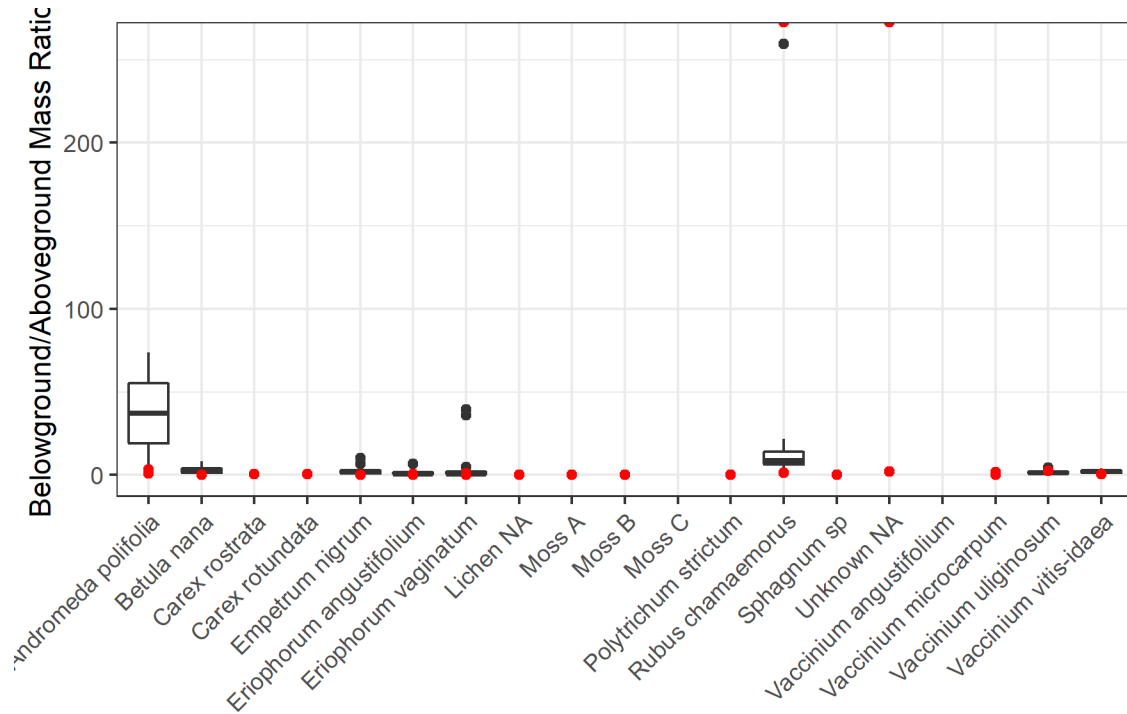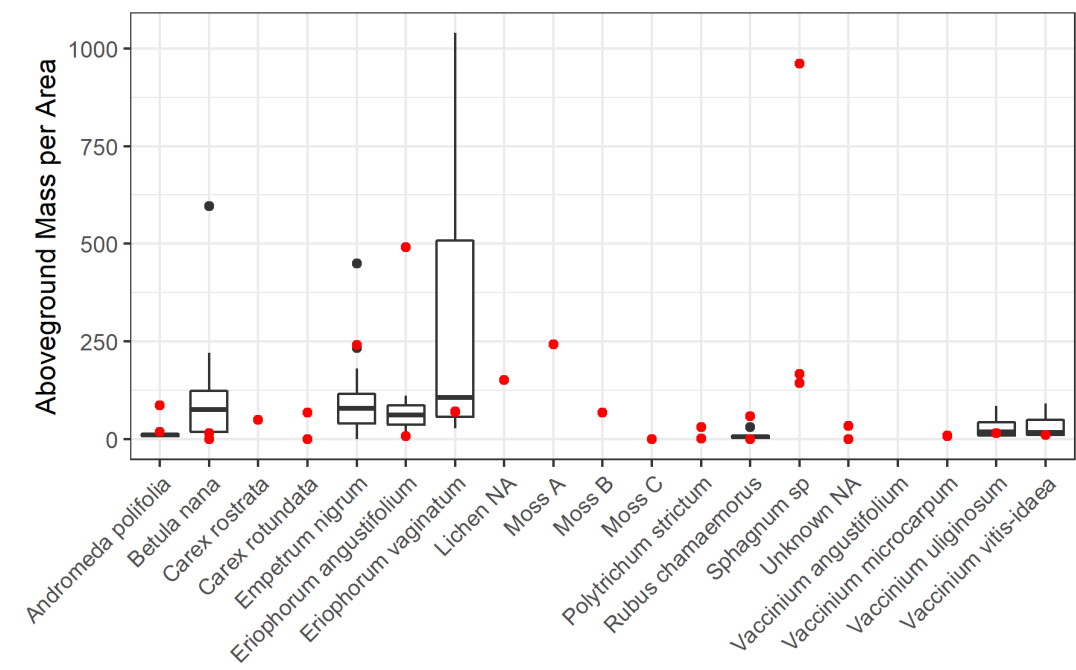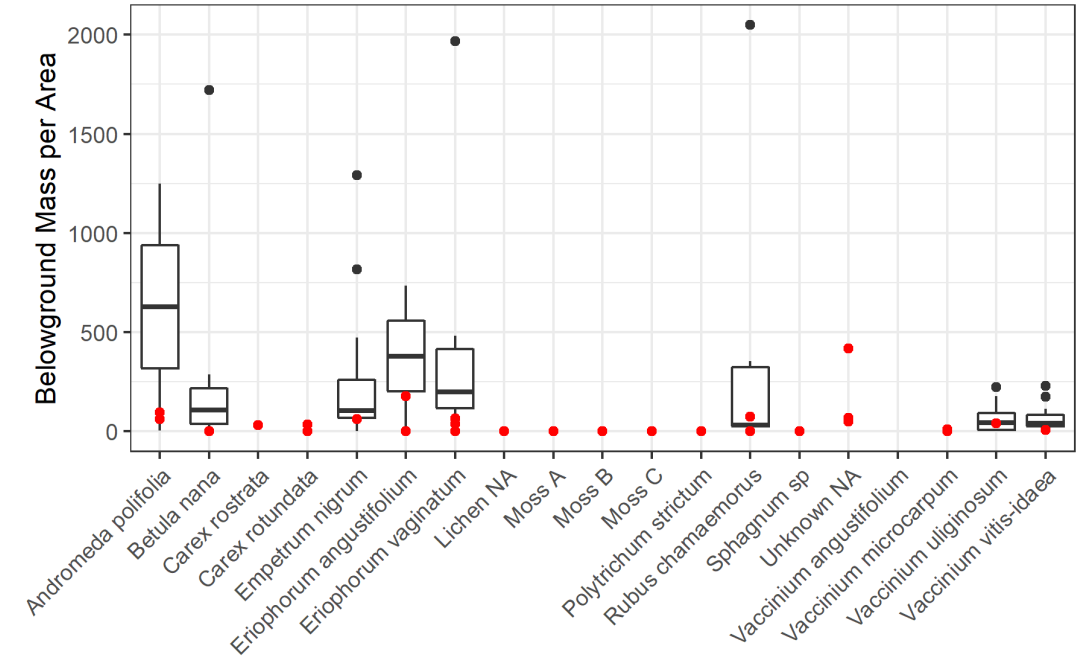

Supplement: GCB-28-950-s001.pdf [file GCB-28-950-s001.pdf]
